# Supplementary material
Source: PubMed Central journal article supplement (PMC7690001)
Supplement: NIHMS1646259-supplement-Supporting_Information.pdf [file NIHMS1646259-supplement-Supporting_Information.pdf]

## Supporting Information

### Aryl Amination Using Soluble Weak Base Enabled by a Water-Assisted Mechanism

Sii Hong Lau,<sup>†</sup> Peng Yu,<sup>†</sup> Liye Chen,<sup>†</sup> Christina B. Madsen-Duggan,<sup>¶</sup> Michael J. Williams,<sup>¶</sup>  
and Brad P. Carrow<sup>†,\*</sup>

<sup>†</sup>*Department of Chemistry, Princeton University, Princeton, NJ 08544, United States*

<sup>¶</sup>*Chemical Process Development, Bristol Myers Squibb, 556 Morris Avenue, Summit, NJ 07902, United States*

\*Email: bcarrow@princeton.edu

|                                                                         |      |
|-------------------------------------------------------------------------|------|
| General Remarks.....                                                    | S2   |
| Methodology Optimization .....                                          | S3   |
| Compound Characterization.....                                          | S9   |
| Multi-Gram Synthesis of Compounds <b>2</b> and <b>30</b> .....          | S27  |
| Synthesis, Characterization, and Reactions of Palladium Compounds ..... | S32  |
| Kinetic Experiments.....                                                | S69  |
| NMR Spectra .....                                                       | S81  |
| References .....                                                        | S116 |

## General Remarks

All reactions were performed inside a dry nitrogen filled glovebox or using standard Schlenk techniques unless otherwise noted. Solvents (tetrahydrofuran, toluene, diethyl ether, dichloromethane, *n*-pentane, *tert*-amyl alcohol (*t*-AmOH), cyclopentyl methyl ether (CPME), and anisole) were purified in a solvent purification system by percolation through neutral alumina under positive pressure of nitrogen or purchased from Millipore Sigma in Sure/Seal® containers. Deuterated solvents (chloroform-*d*<sub>3</sub>, benzene-*d*<sub>6</sub>, tetrahydrofuran-*d*<sub>8</sub>) were stored over 4 Å molecular sieves. All chemicals purchased from commercial suppliers were used as received unless otherwise noted. PdAd<sub>3</sub>,<sup>1</sup> Pd(PAd<sub>3</sub>)(4-FC<sub>6</sub>H<sub>4</sub>)Br (**1**),<sup>2</sup> and [Pd(PAd<sub>3</sub>)(4-FC<sub>6</sub>H<sub>4</sub>)]<sup>+</sup> BF<sub>4</sub><sup>-</sup> (**33**)<sup>3</sup> were prepared according to literature. <sup>1</sup>H, <sup>13</sup>C (<sup>1</sup>H decoupled), <sup>19</sup>F{<sup>1</sup>H}, and <sup>31</sup>P{<sup>1</sup>H} nuclear magnetic resonance spectra (NMR) were obtained on a Bruker Avance III 500 MHz, Bruker NanoBay 400 MHz or Bruker NanoBay 300 MHz spectrometers recorded in ppm (δ), referenced to residual solvent (CHCl<sub>3</sub>, CHDCl<sub>2</sub>, etc.).<sup>4</sup> Spin-spin coupling is described as singlet (s), doublet (d), triplet (t), quartet (q), quintet (quint), heptet (hept), broad (br) or multiplet (m); coupling constants (*J*) are reported in Hz. Purity values were utilized from commercial sources or determined via <sup>1</sup>H NMR spectroscopy (300 MHz, delay = 30 s) implementing 1,3,5-trimethoxybenzene as the internal standard. All analysis was performed on a mixture of accurately weighed (0.01 mg) standard and substrate in deuterated solvents. HR-MS was obtained from either Agilent 6320B LC TOF-MS with 0.01 M ammonium acetate in 95:5 and 5:95 mixtures of acetonitrile and water as mobile phases or Waters GCT Premier Spectrometer using the desorption chemical ionization probe (DCI) with methane as CI reagent gas. UPLC analysis was performed on a Waters I-Class instrument (MP-A: 0.05% TFA in 95:5 water:acetonitrile; MP-B: 0.05% TFA in 95:5 acetonitrile:water; Column: Agilent Zorbax Eclipse C18+ (2.1 x 50 mm; 1.8 μm); Temperature: 40 °C; flow: 0.8 mL/min; wavelength: specified for experiment; and gradient: 100 % MPA to 100% MPB over 1.2 min, hold at 100% MPB for 0.4 min, and return to initial conditions). Measurement of pH was accomplished using a Mettler Toledo Seven Excellence meter (with pH electrode) and calibrated using commercially available buffer standards (pH = 4, 7, and 10; slope ≥ 99%).

## Methodology Optimization

**General procedure for high-throughput screening.** A 96-well aluminum microvial plate (Analytical Sales & Services cat. no. 96973) was equipped with 1 mL microvials (Analytical Sales & Services cat. no. 884001). In all reactions, stock solutions of reactants were used. In cases where reactants were only partially soluble, slurry additions were employed. Catalyst Pd(PAd<sub>3</sub>)(4-C<sub>6</sub>H<sub>4</sub>F)Br **1** (0.2 μmol, 0.004 M) was loaded by one of two methods: (i) a THF solution (50 μL) was transferred to all vials in the reaction plate then the plate was evaporated to dryness using a Genevac, at RT, 15 min, 20 Torr, or (ii) a solution/slurry of **1** (50 μL) using the appropriate solvent choice for each well depicted in Figure S1 was transferred to the reaction plate last after all other reagents and solvent were charged. For reactant dosing in method *i*, stock solutions containing 4-chloro-1,1'-biphenyl (20 μmol, 0.2 M), 4-nitroaniline (24 μmol, 0.24 M), and 4-propyl-1,1'-biphenyl (internal standard, 2 μmol, 0.04 M) in the indicated solvent were each dispensed into the appropriate wells (100 μL), as shown in Figure S1. For reactant dosing in method *ii*, stock solutions containing 4-chloro-1,1'-biphenyl (20 μmol, 0.4 M), 4-nitroaniline (24 μmol, 0.48 M), and 4-propyl-1,1'-biphenyl (internal standard, 2 μmol, 0.08 M) in the indicated solvent were each dispensed into the appropriate wells (50 μL), as shown in Figure S1. To the left half of the plate (wells A1:A6, B1:B6, C1:C6, D1:D6, E1:E6, F1:F6, G1:G6, H1:H6) additional solvent (50 μL) was added to the appropriate well. Degassed water (50 μL) was added to the same left half of the plate (wells A1:A6, B1:B6, C1:C6, D1:D6, E1:E6, F1:F6, G1:G6, H1:H6), (solvent / H<sub>2</sub>O (3:1) = 150 μL solvent, 50 μL water total added per well). Degassed water (100 μL) was also added to the right half of the plate (wells A7:A12, B7:B12, C7:C12, D7:D12, E7:E12, F7:F12, G1:G12, H7:H12), (solvent / H<sub>2</sub>O (1:1) = 100 μL solvent, 100 μL water total added per well). The organic bases (40 μmol) were added neat, as diagrammed in Figure S1, the microvial plate was sealed, removed from the glovebox and shaken at 1000 rpm for 16 h at 60 °C on an Eppendorf Thermomixer C with plate adapter. After aging, the reactions were diluted with MeCN: DMSO: H<sub>2</sub>O (3:1:1) with 1% HOAc (0.5 mL) and the plate was sealed and shaken at 1000 rpm an additional 15 minutes at RT. Aliquots of the quenched reaction mixtures (30 μL) were diluted into 750 μL of 2:1 MeCN:water. The plate was filtered and analyzed on Acquity I-class plus, Zorbax Eclipse plus C18, 2.1 x 50 mm, 1.8 μm, TFA, 2 mins methods, 284 nm.

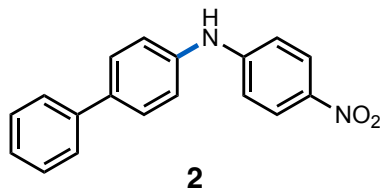

Reaction mixture from wells in columns B1:H1, B2:H2, B7:H7, B8:H8 and B10:H10 in the HTE screen were pooled and diluted with EtOAc (7 mL) and brine (7 mL) and transferred to a separatory funnel. Layers were split and the organics were collected, and solvents evaporated. The solid residue was redissolved in CH<sub>2</sub>Cl<sub>2</sub> and the mixture was purified via silica, eluted with 0-40 % EtOAc/heptanes. Evaporation of solvent, followed by drying under vacuum, provided an analytical sample of **2**, as a yellow solid.

**<sup>1</sup>H NMR** (500 MHz, DMSO-*d*<sub>6</sub>) δ 9.41 (s, 1H), 8.13–8.10 (m, 2H), 7.71–7.65 (m, 4H), 7.48–7.44 (m, 2H), 7.36–7.32 (m, 3H), 7.15–7.11 (m, 2H).

**<sup>13</sup>C NMR** (126 MHz, DMSO-*d*<sub>6</sub>) δ 150.5, 139.6, 139.5, 138.1, 134.9, 128.9, 127.6, 127.1, 126.2, 126.2, 120.8, 113.7.

**HRMS** (ESI+) Calcd. for [C<sub>18</sub>H<sub>15</sub>N<sub>2</sub>O<sub>2</sub><sup>+</sup>] (M+H), 291.1128; Found, 291.1130.

**HPLC** (Zorbax Eclipse plus C18, 2.1 x 50 mm, 1.8 μm, TFA, 2 mins methods, 284 nm):  
1.184 mins

96 total reaction conditions ( 6 bases x 8 solvents x 2 solvent / H<sub>2</sub>O ratios)

Bases: Et<sub>3</sub>N, DIPEA, DBU, MTBD, NMM, TMG

Solvents: MeCN, Anisole, IPAc, DMF, DME, 2-MeTHF, t-AmOH, MEK

Solvent / H<sub>2</sub>O ratios: (3:1) and (1:1)

|         | MTBD                                                                                                               | DBU | TMG | DIPEA | Et <sub>3</sub> N | NMM | MTBD                                                                                                                | DBU | TMG | DIPEA | Et <sub>3</sub> N | NMM |
|---------|--------------------------------------------------------------------------------------------------------------------|-----|-----|-------|-------------------|-----|---------------------------------------------------------------------------------------------------------------------|-----|-----|-------|-------------------|-----|
| MeCN    | <b>Left half of screen</b><br>Solvent / H <sub>2</sub> O (3:1)<br>20 μmol / reaction<br>200 μL scale in microvials |     |     |       |                   |     | <b>Right half of screen</b><br>Solvent / H <sub>2</sub> O (1:1)<br>20 μmol / reaction<br>200 μL scale in microvials |     |     |       |                   |     |
| toluene |                                                                                                                    |     |     |       |                   |     |                                                                                                                     |     |     |       |                   |     |
| IPAc    |                                                                                                                    |     |     |       |                   |     |                                                                                                                     |     |     |       |                   |     |
| DMF     |                                                                                                                    |     |     |       |                   |     |                                                                                                                     |     |     |       |                   |     |
| DME     |                                                                                                                    |     |     |       |                   |     |                                                                                                                     |     |     |       |                   |     |
| 2-MeTHF |                                                                                                                    |     |     |       |                   |     |                                                                                                                     |     |     |       |                   |     |
| t-AmOH  |                                                                                                                    |     |     |       |                   |     |                                                                                                                     |     |     |       |                   |     |
| MEK     |                                                                                                                    |     |     |       |                   |     |                                                                                                                     |     |     |       |                   |     |

**Figure S1.** Plate design for HTE screening of soluble base and solvent combinations at two different solvent/water ratios.



**Table S1. Tabular reaction conversions (%) for HTE screen shown in Figure 1 using catalyst loading method *i*.<sup>a</sup>**

|         |   | Solvent / H <sub>2</sub> O (3:1) |     |     |       |                   |     | Solvent / H <sub>2</sub> O (1:1) |     |     |       |                   |     |
|---------|---|----------------------------------|-----|-----|-------|-------------------|-----|----------------------------------|-----|-----|-------|-------------------|-----|
|         |   | MTBD                             | DBU | TMG | DIPEA | Et <sub>3</sub> N | NMM | MTBD                             | DBU | TMG | DIPEA | Et <sub>3</sub> N | NMM |
|         |   | 1                                | 2   | 3   | 4     | 5                 | 6   | 7                                | 8   | 9   | 10    | 11                | 12  |
| MeCN    | A | 4                                | 0   | 0   | 12    | 13                | 0   | 17                               | 3   | 5   | 40    | 37                | 14  |
| toluene | B | 46                               | 3   | 5   | 15    | 36                | 15  | 79                               | 8   | 9   | 32    | 50                | 25  |
| IPAc    | C | 64                               | 6   | 15  | 37    | 54                | 26  | 55                               | 24  | 14  | 53    | 65                | 35  |
| DMF     | D | 14                               | 3   | 5   | 41    | 49                | 14  | 49                               | 11  | 14  | 71    | 76                | 33  |
| DME     | E | 21                               | 8   | 4   | 37    | 34                | 6   | 51                               | 17  | 26  | 75    | 82                | 26  |
| 2-MeTHF | F | 62                               | 4   | 3   | 42    | 39                | 15  | 76                               | 15  | 10  | 57    | 72                | 26  |
| t-AmOH  | G | 13                               | 27  | 19  | 55    | 66                | 21  | 55                               | 27  | 38  | 74    | 84                | 41  |
| MEK     | H | 25                               | 6   | 7   | 34    | 47                | 7   | 38                               | 6   | 17  | 58    | 72                | 24  |

Conversion (%):

|    |    |    |    |    |    |    |    |
|----|----|----|----|----|----|----|----|
| 10 | 20 | 30 | 40 | 50 | 60 | 70 | 80 |
|----|----|----|----|----|----|----|----|

<sup>a</sup>Normalized conversions, versus 4-propyl-1,1'-biphenyl as internal standard, are reported as a single run.

**Table S2. Tabular reaction conversions (%) for HTE screen using catalyst loading method *ii*.<sup>a</sup>**

|         |   | Solvent / H <sub>2</sub> O (3:1) |     |     |       |                   |     | Solvent / H <sub>2</sub> O (1:1) |     |     |       |                   |     |
|---------|---|----------------------------------|-----|-----|-------|-------------------|-----|----------------------------------|-----|-----|-------|-------------------|-----|
|         |   | MTBD                             | DBU | TMG | DIPEA | Et <sub>3</sub> N | NMM | MTBD                             | DBU | TMG | DIPEA | Et <sub>3</sub> N | NMM |
|         |   | 1                                | 2   | 3   | 4     | 5                 | 6   | 7                                | 8   | 9   | 10    | 11                | 12  |
| MeCN    | A | 4                                | 0   | 0   | 9     | 5                 | 2   | 13                               | 4   | 3   | 52    | 45                | 16  |
| anisole | B | 49                               | 0   | 0   | 56    | 67                | 26  | 65                               | 1   | 5   | 62    | 71                | 38  |
| IPAc    | C | 66                               | 21  | 34  | 46    | 58                | 39  | 57                               | 37  | 35  | 59    | 69                | 39  |
| DMF     | D | 17                               | 3   | 4   | 50    | 60                | 14  | 38                               | 11  | 9   | 50    | 57                | 16  |
| DME     | E | 30                               | 9   | 7   | 49    | 58                | 9   | 54                               | 18  | 22  | 84    | 82                | 32  |
| 2-MeTHF | F | 37                               | 0   | 0   | 60    | 70                | 48  | 70                               | 5   | 7   | 72    | 82                | 57  |
| t-AmOH  | G | 32                               | 21  | 26  | 59    | 66                | 26  | 44                               | 23  | 34  | 81    | 87                | 41  |
| MEK     | H | 39                               | 3   | 17  | 41    | 54                | 10  | 52                               | 9   | 22  | 62    | 72                | 24  |

Conversion (%):

|    |    |    |    |    |    |    |    |    |
|----|----|----|----|----|----|----|----|----|
| 10 | 20 | 30 | 40 | 50 | 60 | 70 | 80 | 90 |
|----|----|----|----|----|----|----|----|----|

<sup>a</sup>Normalized conversions, versus 4-propyl-1,1'-biphenyl as internal standard, are reported as a single run.

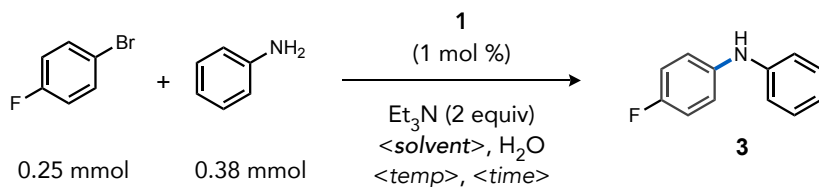

**Representative procedure for non-parallel reaction optimizations.** In a nitrogen filled glovebox, to an oven-dried 4 mL scintillation vial equipped with a stir bar was charged with 1-bromo-4-fluorobenzene (27  $\mu\text{L}$ , 0.25 mmol, 1.0 equiv), aniline (34  $\mu\text{L}$ , 0.375 mmol, 1.5 equiv), triethylamine (70  $\mu\text{L}$ , 0.50 mmol, 2.0 equiv), trifluorotoluene (internal standard, 10  $\mu\text{L}$ , 0.083 mmol, 0.33 equiv), Pd(PAD<sub>3</sub>)(4-C<sub>6</sub>H<sub>4</sub>F)Br (**1**) (1.8 mg, 2.5  $\mu\text{mol}$ , 1 mol %) and solvent. The vial was capped with a puncturable PTFE-lined cap and taken out of the glovebox. Under N<sub>2</sub> atmosphere, degassed deionized water was injected into the vial and the reaction mixture was left stirring at a certain temperature for the desired time period. After cooling down to room temperature, the mixture was diluted with CDCl<sub>3</sub> (1 mL) and the organic layer was separated for NMR characterization. The yield of **3** was obtained from the relative <sup>19</sup>F resonance integration of product and standard.<sup>5</sup>

**Table S3. Effect of water on C–N coupling yield.**

| Entry | Variation from standard conditions <sup>a</sup> | Yield (%) |
|-------|-------------------------------------------------|-----------|
| 1     | 1:2 tol:H <sub>2</sub> O                        | >99       |
| 2     | No water (1.0/0.0 mL)                           | 0         |
| 3     | 25:1 tol:H <sub>2</sub> O (1.0/0.04 mL)         | 5         |
| 4     | 10:1 tol:H <sub>2</sub> O (1.0/0.1 mL)          | 18        |
| 5     | 2:1 tol:H <sub>2</sub> O (1.0/0.5 mL)           | 50        |
| 6     | 1:1 tol:H <sub>2</sub> O (1.0/1.0 mL)           | 55        |
| 7     | 0:1 tol:H <sub>2</sub> O (0.0/1.0 mL)           | >99       |

<sup>a</sup>Conditions: toluene (0.5 mL):H<sub>2</sub>O (1 mL), 60 °C, 24 h.

**Table S4. Effect of base, additive, and electrophile identity on the C–N coupling yield.**

| Entry | Variation from standard conditions <sup>a</sup>                                                       | Yield (%) |
|-------|-------------------------------------------------------------------------------------------------------|-----------|
| 1     | None (1:4 tol:H <sub>2</sub> O (0.25/1.0 mL))                                                         | 61        |
| 2     | 1:2 toluene:H <sub>2</sub> O                                                                          | 92        |
| 3     | NCy <sub>2</sub> Me instead of NEt <sub>3</sub>                                                       | 25        |
| 4     | Triethanolamine instead of NEt <sub>3</sub>                                                           | 33        |
| 5     | With 1.1 equiv LiI as additive                                                                        | 11        |
| 6     | <i>p</i> -F-C <sub>6</sub> H <sub>4</sub> OTf instead of <i>p</i> -F-C <sub>6</sub> H <sub>4</sub> Br | 3         |

<sup>a</sup>Conditions: toluene (0.5 mL):H<sub>2</sub>O (1 mL), 60 °C, 6 h.

**Table S5. Effect of solvent choice on the C–N coupling yield.**

| Entry | Variation from standard conditions <sup>a</sup>                         | Yield (%) |
|-------|-------------------------------------------------------------------------|-----------|
| 1     | None                                                                    | 59        |
| 2     | THF instead of toluene                                                  | 52        |
| 3     | Dioxane instead of toluene                                              | 44        |
| 4     | 2-MeTHF instead of toluene                                              | 53        |
| 5     | DMF instead of toluene                                                  | 45        |
| 6     | DMA instead of toluene                                                  | 35        |
| 7     | K Phosphate Buffer pH 7.0 (0.1 M) instead of water, no NEt <sub>3</sub> | 0         |
| 8     | K Phosphate Buffer pH 6.0 (0.1 M) instead of water                      | 44        |
| 9     | K Phosphate Buffer pH 7.0 (0.1 M) instead of water                      | 46        |
| 10    | K Phosphate Buffer pH 8.0 (0.1 M) instead of water                      | 26        |

<sup>a</sup>Conditions: toluene (0.25 mL):H<sub>2</sub>O (1 mL), 60 °C, 1 h.

**Catalyst screen.** Complex **1** was compared against other selected palladium catalysts<sup>6</sup> for Buchwald-Hartwig amination using three substrate combinations:

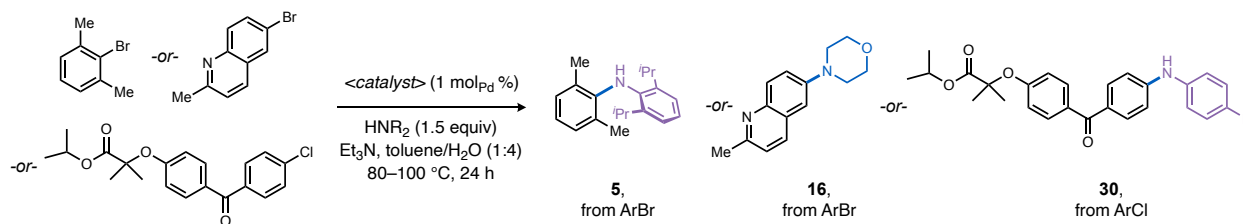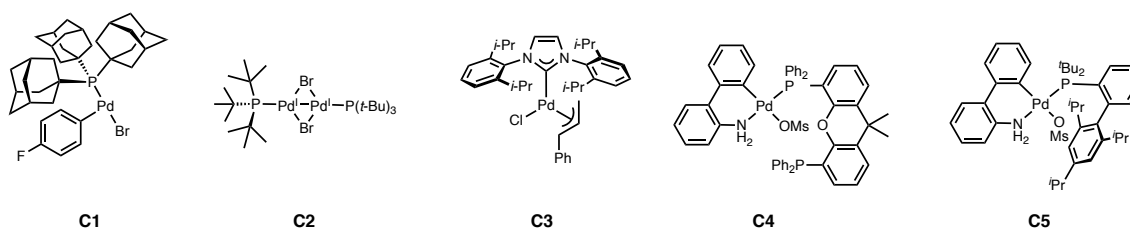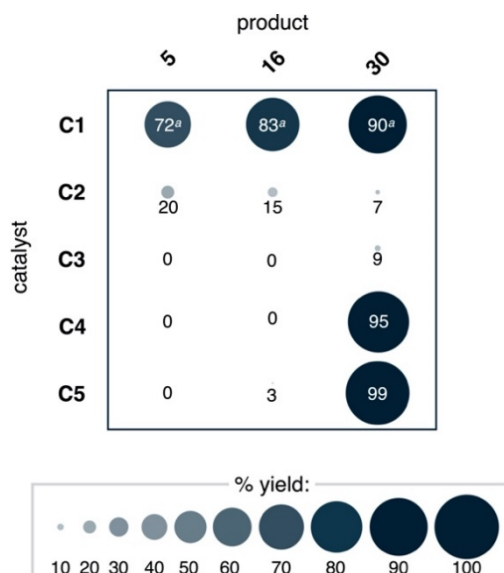

**Figure S2.** Survey of alternative Pd catalysts to form products **5** or **16** using procedure A on 0.25 mmol scale, or **30** using procedure B on 0.25 mmol scale. Yields were determined by <sup>1</sup>H or <sup>19</sup>F NMR using 1,3,5-(CF<sub>3</sub>)<sub>3</sub>C<sub>6</sub>H<sub>3</sub>, 1,3,5-(MeO)<sub>3</sub>C<sub>6</sub>H<sub>3</sub>, or CF<sub>3</sub>C<sub>6</sub>H<sub>5</sub> as internal standard for **5**, **16**, or **30**, respectively. <sup>a</sup>Isolated yield.

**Comparison of **1** to commercial precatalyst.** Into separate 4 mL vials equipped with stir bar and PTFE septa in a nitrogen filled glovebox were added either **1** (1.8 mg, 2.5  $\mu$ mol, 1 mol %) or (2'-amino-1,1'-biphenyl-2-yl)methanesulfonatopalladium(II) dimer, CAS [1435520-65-2] (0.924 mg, 1.250  $\mu$ mol, 0.5 mol %) and PAd<sub>3</sub> (1.092 mg, 2.500  $\mu$ mol, 1 mol %). Toluene (0.25 mL) was charged into each vial and the mixture was capped and stirred for approximately 10 min. 4-Chloro-1,1'-biphenyl (0.047 g, 0.25 mmol, 1.0 equiv) and 4-nitroaniline (0.052 g, 0.375 mmol, 0.375 mmol, 1.5 equiv) were then added to each vial. Additional toluene (0.25 mL) was added to the vial containing **1**. Triethylamine (70  $\mu$ L, 0.50 mmol, 2.0 equiv) was added to each vial, then they were sealed with a puncturable PTFE-lined cap and taken out of the glovebox. Degassed deionized water (1 mL) was injected into the vials and the reaction mixture was heated and stirring at 80 °C overnight. After cooling down to room temperature, the mixtures were each transferred and diluted into a 100 mL volumetric flask with THF (5 mL), MeCN (60 mL), water (20 mL) and DMSO (15 mL) whereupon conversion (%) and solution yield (%) were determined for each of the reactions using calibrated UPLC analysis.

**Table S6. Effect of (Ad<sub>3</sub>P)Pd precatalyst on the C–N coupling yield.**

Reaction scheme: 4-chlorobiphenyl + 4-nitroaniline  $\xrightarrow[\text{Et}_3\text{N (2 equiv), toluene, H}_2\text{O (1:4), 80 }^\circ\text{C, overnight}]{\text{< catalyst > (1.0 mol \% )}}$  2

| Entry | Catalyst                                   | Conversion (%) | Yield (%) |
|-------|--------------------------------------------|----------------|-----------|
| 1     | <b>1</b>                                   | 99.3           | 95        |
| 2     | PAd <sub>3</sub> -Buchwald-G3 <sup>a</sup> | 87.5           | 86        |

<sup>a</sup>Generated *in situ* by the admixture of PAd<sub>3</sub> and (2'-amino-1,1'-biphenyl-2-yl)methanesulfonatopalladium(II) dimer (CAS [1435520-65-2]) in 2:1 ratio.

## General procedures for C–N coupling reactions

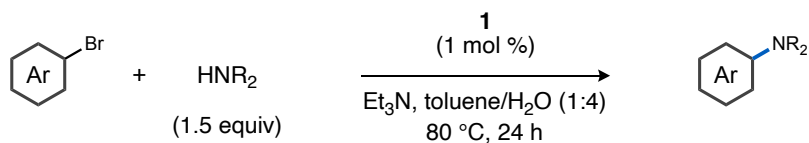

**Procedure A (bromoarenes).** To an oven-dried 20 mL scintillation vial equipped with a stir bar was charged with Pd(PAd<sub>3</sub>)(4-C<sub>6</sub>H<sub>4</sub>F)Br (**1**) (5.4 mg, 7.5 μmol, 1 mol %), aryl bromide (0.75 mmol), amine nucleophile (1.13 mmol, 1.5 equiv), triethylamine (0.20 mL, 1.5 mmol, 2.0 equiv), and toluene (0.75 mL) under nitrogen (a 4 mL scintillation vial was used as reaction vessel for reactions conducted on 0.05 or 0.25 mmol-scale). The vial was capped with a puncturable PTFE-lined cap and taken out of the glovebox.<sup>a</sup> Degassed deionized water (3.0 mL) was injected into the vial *via* a syringe. The reaction mixture was stirred at 80 °C for 24 h. After cooling to room temperature, the mixture was extracted with dichloromethane (3 x 5 mL) and the organic layer was dried over Na<sub>2</sub>SO<sub>4</sub>. After evaporation, the crude product was purified by column chromatography.

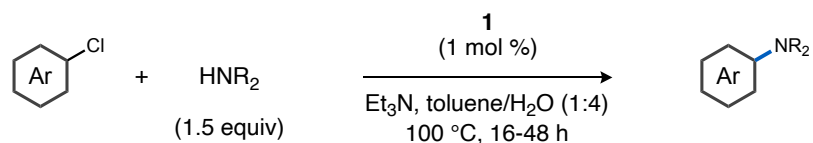

**Procedure B (chloroarenes).** To an oven-dried 4 mL scintillation vial equipped with a stir bar was charged with Pd(PAd<sub>3</sub>)(4-C<sub>6</sub>H<sub>4</sub>F)Br (**1**) (1.8 mg, 2.5 μmol, 1 mol %), aryl chloride (0.25 mmol), amine nucleophile (0.38 mmol, 1.5 equiv), triethylamine (70 μL, 0.50 mmol, 2.0 equiv), and toluene (0.25 mL) under nitrogen. The vial was capped with a puncturable PTFE-lined cap and taken out of the glovebox.<sup>a</sup> Degassed deionized water (1.0 mL) was injected into the vial *via* a syringe. The reaction mixture was left stirring at 100 °C for the indicated time. After cooling to room temperature, the mixture was extracted with dichloromethane (3 x 5 mL) and the organic layer was dried over Na<sub>2</sub>SO<sub>4</sub>. After evaporation, the crude product was purified by column chromatography.

<sup>a</sup>Note that reaction preparation in a glove box was convenient but unnecessary. A benchtop procedure has also been demonstrated. See scaled synthesis of **30** on pS29 for details.

### Compound Characterization:

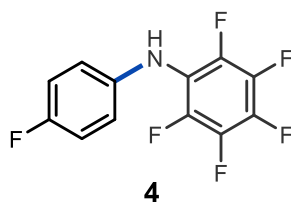

General procedure A was used, except using water (3.0 mL) as the only solvent, on 0.75 mmol scale, and 191 mg of **4** (92%) was obtained as a pink solid.

**<sup>1</sup>H NMR** (500 MHz, CDCl<sub>3</sub>) δ 7.07–6.96 (m, 2H), 6.83–6.81 (m, 2H), 5.37 (s, 1H).

**<sup>13</sup>C NMR** (126 MHz, CDCl<sub>3</sub>) δ 158.6 (d,  $J = 241.4$  Hz), 141.0 (m, only  $^1J_{\text{CF}} = 246.3$  Hz is well-resolved), 138.4 (m, only  $^1J_{\text{CF}} = 250.2$  Hz is well-resolved), 138.2 (d,  $J = 2.5$  Hz), 137.0 (m, only  $^1J_{\text{CF}} = 249.6$  Hz is well-resolved), 118.8 (d,  $J = 8.1$  Hz), 118.4–118.2 (m), 116.0 (d,  $J = 22.9$  Hz).

**<sup>19</sup>F NMR** (376 MHz, CDCl<sub>3</sub>) δ -121.3 (m, 1F), -150.5 – -150.6 (m, 2F), -162.7 (td,  $J = 21.8, 5.3$  Hz, 2F), -164.3 (tt,  $J = 21.8, 3.4$  Hz, 1F).

**HRMS** (DCI) Calcd. for [C<sub>12</sub>H<sub>5</sub>F<sub>6</sub>N] (M), 277.0326; Found, 277.0338.

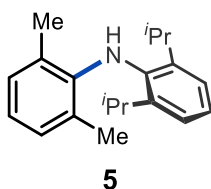

General procedure A was used on 0.75 mmol scale, and 152 mg (72%) of **5** was obtained as a colorless liquid.

**<sup>1</sup>H NMR** (500 MHz, CDCl<sub>3</sub>) δ 7.16–7.10 (m, 3H), 6.94 (d,  $J = 7.5$  Hz, 2H), 6.72 (t,  $J = 7.5$  Hz, 1H), 4.79 (s, 1H), 3.15 (hept,  $J = 7.0$  Hz, 2H), 1.98 (s, 6H), 1.12 (d,  $J = 7.0$  Hz, 12H).

**<sup>13</sup>C NMR** (126 MHz, CDCl<sub>3</sub>) δ 144.3, 143.3, 138.9, 129.6, 125.7, 124.9, 123.4, 119.7, 28.2, 23.6, 19.5.

**HRMS** (ESI+) Calcd. for [C<sub>20</sub>H<sub>28</sub>N<sup>+</sup>] (M+H<sup>+</sup>), 282.2216; Found, 282.2222.

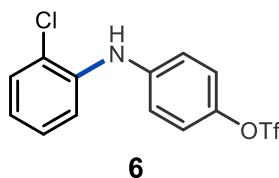

General procedure A was used, except using water (3.0 mL) as the only solvent, on 0.75 mmol scale, and 219 mg (83%) of **6** was obtained as a colorless liquid.

**<sup>1</sup>H NMR** (500 MHz, CDCl<sub>3</sub>) δ 7.40 (dd, *J* = 8.0, 1.5 Hz, 1H), 7.30 (dd, *J* = 8.0, 1.5 Hz, 1H), 7.22–7.13 (m, 5H), 6.91 (td, *J* = 7.5, 1.5 Hz, 1H), 6.14 (s, 1H).

**<sup>13</sup>C NMR** (126 MHz, CDCl<sub>3</sub>) δ 143.9, 142.3, 139.0, 130.2, 127.7, 123.0, 122.6, 122.1, 119.8, 118.9 (q, *J* = 321.3 Hz), 117.2.

**HRMS** (ESI+) Calcd. for [C<sub>13</sub>H<sub>10</sub>ClF<sub>3</sub>NO<sub>3</sub>S<sup>+</sup>] (M+H<sup>+</sup>), 352.0017; Found, 352.0020.

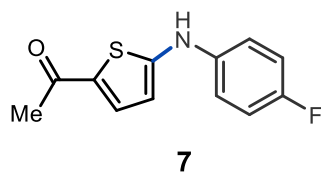

General procedure B was used on 0.25 mmol scale (48 h reaction time), and 26.5 mg (45%) of **7** was obtained as a grey solid.

**<sup>1</sup>H NMR** (500 MHz, CDCl<sub>3</sub>) δ 7.45 (d, *J* = 4.0 Hz, 1H), 7.18–7.16 (m, 2H), 7.04 (t, *J* = 9.0 Hz, 2H), 6.50 (s, 1H), 6.39 (d, *J* = 4.0 Hz, 1H), 2.46 (s, 3H).

**<sup>13</sup>C NMR** (126 MHz, CDCl<sub>3</sub>) δ 189.6, 159.0 (d, *J* = 243.2 Hz), 158.4, 137.5 (d, *J* = 2.6 Hz), 134.2, 130.3, 120.5 (d, *J* = 7.8 Hz), 116.5 (d, *J* = 22.9 Hz), 109.3, 25.7.

**<sup>19</sup>F NMR** (376 MHz, CDCl<sub>3</sub>) δ -119.2.

**HRMS** (DCI) Calcd. for [C<sub>12</sub>H<sub>11</sub>FNOS<sup>+</sup>] (M+H), 236.0545; Found, 236.0536.



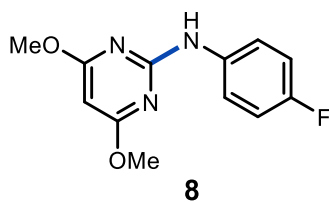

General procedure B was used on 0.25 mmol scale (16 h reaction time), and 56 mg (90%) of **8** was obtained as a white solid.

**<sup>1</sup>H NMR** (500 MHz, CDCl<sub>3</sub>) δ 7.58–7.54 (m, 2H), 7.03–6.99 (m, 2H), 6.97 (s, 1H), 5.58 (s, 1H), 3.90 (s, 6H)

**<sup>13</sup>C NMR** (126 MHz, CDCl<sub>3</sub>) δ 172.1, 158.4 (d, *J* = 240.0 Hz), 157.5, 135.8 (d, *J* = 2.5 Hz), 120.83 (d, *J* = 7.5 Hz), 115.5 (d, *J* = 21.3 Hz), 81.2, 54.0.

**<sup>19</sup>F NMR** (282 MHz, CDCl<sub>3</sub>) δ -121.1.

**HRMS** (ESI+) Calcd. for [C<sub>12</sub>H<sub>13</sub>FN<sub>3</sub>O<sub>2</sub><sup>+</sup>] (M+H<sup>+</sup>), 250.0986; Found, 250.0995.

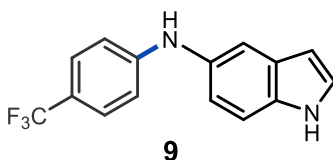

General procedure A was used on 0.75 mmol scale, and 174 mg (84%) of **9** was obtained as a brown solid.

**<sup>1</sup>H NMR** (500 MHz, CDCl<sub>3</sub>) δ 8.17 (s, 1H), 7.47 (d, *J* = 2.5 Hz, 1H), 7.40 (t, *J* = 8.5 Hz, 3H), 7.25 (d, *J* = 3.0 Hz, 1H), 7.05 (dd, *J* = 8.5, 2.0 Hz, 1H), 6.88 (d, *J* = 9.0 Hz, 2H), 6.53 (t, *J* = 2.0 Hz, 1H), 5.87 (s, 1H).

**<sup>13</sup>C NMR** (126 MHz, CDCl<sub>3</sub>) δ 149.6, 133.5, 133.3, 128.7, 126.7 (q, *J* = 3.8 Hz), 125.4, 125.0 (q, *J* = 270.6 Hz), 120.0 (q, *J* = 32.6 Hz), 119.5, 115.5, 113.6, 112.0, 102.8.

**HRMS** (ESI+) Calcd. for [C<sub>15</sub>H<sub>12</sub>F<sub>3</sub>N<sub>2</sub><sup>+</sup>] (M+H<sup>+</sup>), 277.0947; Found, 277.0955.

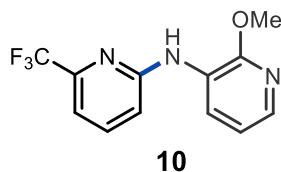

General procedure A was used on 0.25 mmol scale, and 61.2 mg (91%) of **10** was obtained as a white solid.

**<sup>1</sup>H NMR** (500 MHz, CDCl<sub>3</sub>) δ 8.71 (dd, *J* = 7.9, 1.7 Hz, 1H), 7.78 (d, *J* = 1.7 Hz, 1H), 7.65 (t, *J* = 8.0 Hz, 1H), 7.17 (s, 1H), 7.14 (d, *J* = 7.3 Hz, 1H), 6.94 (dd, *J* = 7.8, 5.0 Hz, 1H), 6.91 (d, *J* = 8.4 Hz, 1H), 4.05 (s, 3H).

**<sup>13</sup>C NMR** (126 MHz, CDCl<sub>3</sub>) δ 155.06, 153.04, 146.36 (q, *J* = 34.3 Hz), 138.36, 138.01, 124.91, 124.30, 121.68 (q, *J* = 274.1 Hz), 117.54, 113.99, 111.62, 53.81.

**<sup>19</sup>F NMR** (376 MHz, CDCl<sub>3</sub>) δ -68.64.

**HRMS** (ESI+) Calcd. for [C<sub>12</sub>H<sub>11</sub>F<sub>3</sub>N<sub>3</sub>O<sup>+</sup>] (M+H<sup>+</sup>), 270.0849; Found, 270.0858.

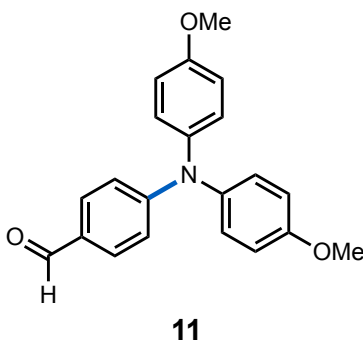

General procedure A was used on 0.75 mmol scale, and 228 mg (91%) of **11** was obtained as a yellow oil.

**<sup>1</sup>H NMR** (500 MHz, CDCl<sub>3</sub>) δ 9.76 (s, 1H), 7.64–7.62 (m, 2H), 7.14–7.12 (m, 4H), 6.91–6.84 (m, 6H), 3.82 (s, 6H).

**<sup>13</sup>C NMR** (126 MHz, CDCl<sub>3</sub>) δ 190.43, 157.43, 154.19, 138.94, 131.56, 128.20, 127.89, 116.87, 115.18, 55.64.

**HRMS** (ESI+) Calcd. for [C<sub>21</sub>H<sub>20</sub>NO<sub>3</sub><sup>+</sup>] (M+H<sup>+</sup>), 334.1438; Found, 334.1445.

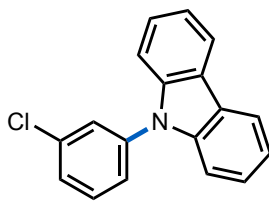

**12**

General procedure A was used on 0.75 mmol scale, and 165 mg (79%) of **12** was obtained as a yellow oil.

**<sup>1</sup>H NMR** (500 MHz, CDCl<sub>3</sub>) δ 8.15 (d, *J* = 8.0 Hz, 2H), 7.60 (t, *J* = 2.0 Hz, 1H), 7.55 (t, *J* = 8.0 Hz, 1H), 7.50 – 7.48 (m, 1H), 7.47 – 7.44 (m, 1H), 7.44 – 7.41 (m, 4H), 7.33 – 7.29 (m, 2H).

**<sup>13</sup>C NMR** (126 MHz, CDCl<sub>3</sub>) δ 140.7, 139.1, 135.5, 131.0, 127.7, 127.4, 126.3, 125.4, 123.6, 120.5, 120.5, 109.8.

**HRMS** (ESI+) Calcd. for [C<sub>18</sub>H<sub>13</sub>ClN<sup>+</sup>] (M+H<sup>+</sup>), 278.0731; Found, 278.0737.

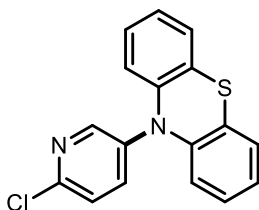

**13**

General procedure A was used on 0.25 mmol scale, and 67.6 mg (87%) of **13** was obtained as a white solid.

**<sup>1</sup>H NMR** (500 MHz, CDCl<sub>3</sub>) δ 8.40 – 8.39 (m, 1H), 7.66 (dd, *J* = 8.5, 3.0 Hz, 1H), 7.49 – 7.47 (m, 1H), 7.18 – 7.16 (m, 2H), 7.04 – 7.00 (m, 2H), 6.99 – 6.95 (m, 2H), 6.48 – 6.46 (m, 2H).

**<sup>13</sup>C NMR** (126 MHz, CDCl<sub>3</sub>) δ 148.6, 143.0, 138.2, 127.8, 127.4, 125.8, 124.5, 124.3, 118.8, 118.8.

**HRMS** (ESI+) Calcd. for [C<sub>17</sub>H<sub>12</sub>ClN<sub>2</sub>S<sup>+</sup>] (M+H<sup>+</sup>), 311.0404; Found, 311.0411.

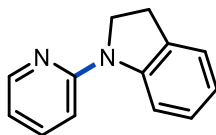

**14**

General procedure A was used, except using water (3.00 mL) as the only solvent and 3 mol % **1**, on 0.75 mmol scale, and 119 mg (81%) of **14** was obtained as an off-white solid.

**<sup>1</sup>H NMR** (500 MHz, CDCl<sub>3</sub>) δ 8.37 – 8.35 (m, 1H), 8.22 – 8.19 (m, 1H), 7.61 – 7.56 (m, 1H), 7.21 – 7.17 (m, 2H), 6.87 (t, *J* = 9.0 Hz, 1H), 6.79 – 6.76 (m, 2H), 4.04 (t, *J* = 10.5 Hz, 2H), 3.21 (t, *J* = 10.5 Hz, 2H).

**<sup>13</sup>C NMR** (126 MHz, CDCl<sub>3</sub>) δ 155.6, 148.1, 145.0, 137.4, 131.5, 127.4, 124.7, 120.5, 114.5, 113.4, 108.7, 49.5, 27.8.

**HRMS** (ESI+) Calcd. for [C<sub>13</sub>H<sub>13</sub>N<sub>2</sub><sup>+</sup>] (M+H<sup>+</sup>), 197.1073; Found, 197.1080.

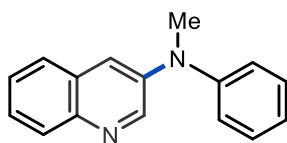

**15**

General procedure A was used on 0.25 mmol scale, and 57.4 mg (98%) of **15** was obtained as a yellow oil.

**<sup>1</sup>H NMR** (500 MHz, CDCl<sub>3</sub>) δ 8.69 (d, *J* = 3.0 Hz, 1H), 7.99 (d, *J* = 8.5 Hz, 1H), 7.67 (dd, *J* = 8.0, 2.0 Hz, 1H), 7.52 – 7.50 (m, 2H), 7.49 – 7.46 (m, 1H), 7.36 – 7.33 (m, 2H), 7.16 – 7.13 (m, 2H), 7.11 – 7.08 (m, 1H), 3.44 (s, 3H).

**<sup>13</sup>C NMR** (126 MHz, CDCl<sub>3</sub>) δ 148.2, 146.4, 143.3, 142.6, 129.8, 129.1, 129.1, 127.1, 126.7, 126.6, 123.4, 122.3, 119.6, 40.6.

**HRMS** (ESI+) Calcd. for [C<sub>16</sub>H<sub>15</sub>N<sub>2</sub><sup>+</sup>] (M+H<sup>+</sup>), 235.1230; Found, 235.1233.

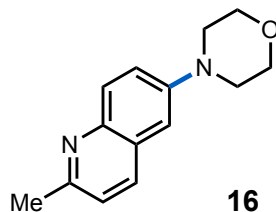

General procedure A was used on 0.25 mmol scale, and 47.4 mg (83%) of **16** was obtained as an orange solid.

**<sup>1</sup>H NMR** (500 MHz, CDCl<sub>3</sub>) δ 7.91 (dd, *J* = 9.0, 3.0 Hz, 2H), 7.45 (dd, *J* = 9.0, 3.0 Hz, 1H), 7.22 (d, *J* = 8.0 Hz, 1H), 7.01 (d, *J* = 7.5 Hz, 1H), 3.93–3.91 (m, 4H), 3.28 – 3.26 (m, 4H), 2.70 (s, 3H).

**<sup>13</sup>C NMR** (126 MHz, CDCl<sub>3</sub>) δ 156.4, 148.9, 143.7, 135.2, 129.6, 127.5, 122.5, 122.1, 109.4, 67.0, 49.8, 25.2.

**HRMS** (ESI+) Calcd. for [C<sub>14</sub>H<sub>17</sub>N<sub>2</sub>O<sup>+</sup>] (M+H<sup>+</sup>), 229.1335; Found, 229.1343.

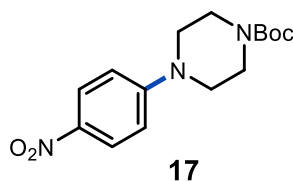

General procedure A was used on 0.75 mmol scale, and 205 mg (89%) of **17** was obtained as an orange solid.

**<sup>1</sup>H NMR** (500 MHz, CDCl<sub>3</sub>) δ 8.14 (d, *J* = 9.5 Hz, 2H), 6.82 (d, *J* = 9.0 Hz, 2H), 3.61 – 3.59 (m, 4H), 3.43 – 3.41 (m, 4H), 1.49 (s, 9H).

**<sup>13</sup>C NMR** (126 MHz, CDCl<sub>3</sub>) δ 154.8, 154.7, 138.9, 126.1, 113.0, 80.5, 47.0, 28.5.

**HRMS** (ESI+) Calcd. for [C<sub>15</sub>H<sub>22</sub>N<sub>3</sub>O<sub>4</sub><sup>+</sup>] (M+H<sup>+</sup>), 308.1605; Found, 308.1606.

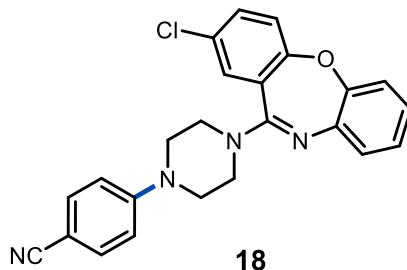

General procedure A was used (48 h reaction time) on 0.25 mmol scale, and 63.3 mg (61%) of **18** was obtained as an off-white solid.

**<sup>1</sup>H NMR** (500 MHz, CDCl<sub>3</sub>) δ 7.53 (d, *J* = 9.0 Hz, 2H), 7.42 (d, *J* = 9.0, 3.0 Hz, 1H), 7.36 (d, *J* = 3.0 Hz, 1H), 7.21 (d, *J* = 8.5 Hz, 1H), 7.18 – 7.16 (m, 1H), 7.12 – 7.09 (m, 2H), 7.04 – 7.01 (m, 1H), 6.91 (d, *J* = 8.5 Hz, 2H), 3.69 (s, 4H), 3.46 (s, 4H).

**<sup>13</sup>C NMR** (126 MHz, CDCl<sub>3</sub>) δ 159.5, 158.9, 153.4, 151.9, 139.9, 133.7, 133.0, 130.6, 129.0, 127.3, 126.0, 125.1, 124.9, 123.0, 120.3, 120.0, 114.7, 101.1, 47.2.

**HRMS** (ESI+) Calcd. for [C<sub>24</sub>H<sub>20</sub>ClN<sub>4</sub>O<sup>+</sup>] (M+H<sup>+</sup>), 415.1320; Found, 415.1326.

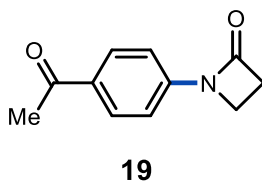

General procedure A was used on 0.25 mmol scale, and 42.1 mg (89%) of **19** was obtained as an off-white solid.

**<sup>1</sup>H NMR** (500 MHz, CDCl<sub>3</sub>) δ 7.96 (d, *J* = 9.0 Hz, 2H), 7.41 (d, *J* = 8.5 Hz, 2H), 3.70 (t, *J* = 4.5 Hz, 2H), 3.18 (d, *J* = 4.5 Hz, 2H), 2.58 (s, 3H).

**<sup>13</sup>C NMR** (126 MHz, CDCl<sub>3</sub>) δ 196.9, 164.9, 142.3, 132.7, 130.1, 115.9, 38.4, 36.7, 26.6.

**HRMS** (ESI+) Calcd. for [C<sub>11</sub>H<sub>12</sub>NO<sub>2</sub><sup>+</sup>] (M+H<sup>+</sup>), 190.0863; Found, 190.0870.

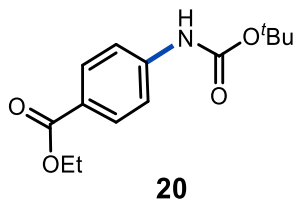

General procedure A was used on 0.75 mmol scale, and 193 mg (97%) of **20** was obtained as a white solid.

**<sup>1</sup>H NMR** (500 MHz, CDCl<sub>3</sub>) δ 7.98 (d, *J* = 9.0 Hz, 2H), 7.42 (d, *J* = 8.5 Hz, 2H), 6.66 (s, 1H), 4.35 (d, *J* = 7.0 Hz, 2H), 1.53 (s, 9H), 1.38 (t, *J* = 7.0 Hz, 3H).

**<sup>13</sup>C NMR** (126 MHz, CDCl<sub>3</sub>) δ 166.4, 152.3, 142.7, 131.0, 124.9, 117.4, 81.3, 60.9, 28.4, 14.5.

**HRMS** (ESI+) Calcd. for [C<sub>14</sub>H<sub>20</sub>NO<sub>4</sub><sup>+</sup>] (M+H<sup>+</sup>), 266.1387; Found, 266.1391.

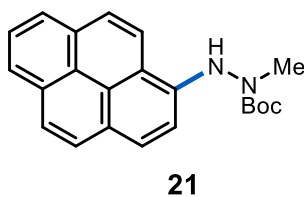

General procedure A was used (48 h reaction time) on 0.25 mmol scale, and 59.8 mg (69%) of **21** was obtained as an off-white solid.

**<sup>1</sup>H NMR** (500 MHz, CDCl<sub>3</sub>) δ 8.12 – 8.06 (m, 3H), 8.05 – 7.99 (m, 2H), 7.98 – 7.93 (m, 2H), 7.87 (d, *J* = 9.0 Hz, 1H), 7.43 (d, *J* = 8.4 Hz, 1H), 7.02 (s, 1H), 3.40 (s, 3H), 1.35 (s, 9H).

**<sup>13</sup>C NMR** (126 MHz, CDCl<sub>3</sub>) δ 156.2, 141.0, 132.0, 131.3, 127.6, 126.6, 126.0, 125.9, 125.7, 125.6, 125.3, 124.6, 124.5, 124.0, 119.3, 117.1, 109.9, 81.3, 37.7, 28.2.

**HRMS** (ESI+) Calcd. for [C<sub>22</sub>H<sub>23</sub>N<sub>2</sub>O<sub>2</sub><sup>+</sup>] (M+H<sup>+</sup>), 369.1573; Found, 369.1580.

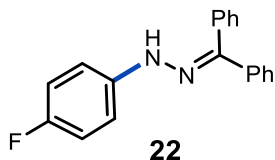

General procedure A was used on 0.25 mmol scale, and 58.1 mg (80%) of **22** was obtained as a brown solid.

**<sup>1</sup>H NMR** (500 MHz, CDCl<sub>3</sub>) δ 7.60 – 7.56 (m, 4H), 7.54 – 7.51 (m, 1H), 7.42 (s, br, 1H), 7.34 – 7.29 (m, 5H), 7.04 – 7.01 (m, 2H), 6.97 – 6.94 (m, 2H).

**<sup>13</sup>C NMR** (126 MHz, CDCl<sub>3</sub>) δ 157.4 (d, *J* = 237.8 Hz), 144.5, 141.1 (d, *J* = 2.1 Hz), 138.4, 132.8, 129.8, 129.4, 129.2, 128.3, 128.2, 126.6, 115.9 (d, *J* = 22.6 Hz), 113.9 (d, *J* = 7.7 Hz).

**HRMS** (ESI+) Calcd. for [C<sub>19</sub>H<sub>16</sub>FN<sub>2</sub><sup>+</sup>] (M+H<sup>+</sup>), 291.1292; Found, 291.1305.

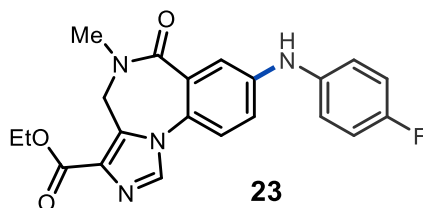

General procedure A was used on 50 μmol scale, and 17.7 mg (90%) of **23** was obtained as an off-white solid.

**<sup>1</sup>H NMR** (500 MHz, CDCl<sub>3</sub>) δ 7.84 (s, 1H), 7.52 (d, *J* = 2.7 Hz, 1H), 7.26 (d, *J* = 8.6 Hz, 1H, obscured by chloroform-*d*<sub>6</sub> peak), 7.17 – 7.10 (m, 3H), 7.08 – 7.02 (m, 2H), 5.93 (s, 1H), 5.25–5.07 (m, 1H), 4.51 – 4.29 (m, 3H), 3.23 (s, 3H), 1.45 (t, *J* = 7.2 Hz, 3H).

**<sup>13</sup>C NMR** (126 MHz, CDCl<sub>3</sub>) δ 166.6, 163.3, 159.4 (d, *J* = 242.9 Hz), 145.2, 136.9 (d, *J* = 2.9 Hz), 135.5, 134.8, 130.4, 128.3, 124.2, 123.3, 123.2 (d, *J* = 8.1 Hz), 118.7, 118.0, 116.6 (d, *J* = 22.6 Hz), 61.1, 42.6, 36.0, 14.6.

**<sup>19</sup>F NMR** (376 MHz, CDCl<sub>3</sub>) δ -118.8.

**HRMS** (ESI+) Calcd. for [C<sub>21</sub>H<sub>20</sub>FN<sub>4</sub>O<sub>3</sub><sup>+</sup>] (M+H<sup>+</sup>), 395.1514; Found, 395.1521.



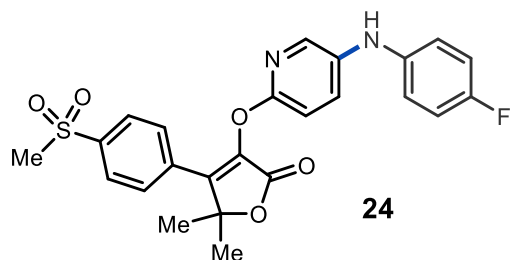

General procedure A was used on 50  $\mu\text{mol}$  scale, and 21.3 mg (91%) of **24** was obtained as a green oil.

**$^1\text{H}$  NMR** (500 MHz,  $\text{CDCl}_3$ )  $\delta$  8.03 – 7.97 (m, 2H), 7.83 – 7.81 (m, 1H), 7.80 – 7.76 (m, 2H), 7.40 (dd,  $J = 8.7, 2.8$  Hz, 1H), 7.01 – 6.89 (m, 6H), 3.07 (s, 3H), 1.76 (s, 6H).

**$^{13}\text{C}$  NMR** (126 MHz,  $\text{CDCl}_3$ )  $\delta$  165.9, 158.2 (d,  $J = 240.8$  Hz), 155.6, 147.6, 141.2, 138.7, 138.1, 137.4, 136.4, 135.1, 129.7, 129.0, 127.9, 120.0 (d,  $J = 7.6$  Hz), 116.2 (d,  $J = 22.6$  Hz), 111.6, 84.3, 44.4, 26.5.

**HRMS** (ESI+) Calcd. for  $[\text{C}_{24}\text{H}_{22}\text{FN}_2\text{O}_5\text{S}^+]$  ( $\text{M}+\text{H}^+$ ), 469.1228; Found, 469.1233.

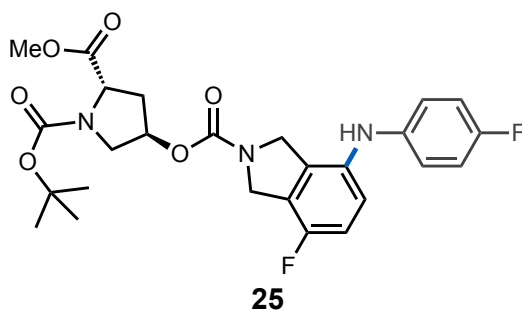

General procedure A was used on 50  $\mu\text{mol}$  scale, and 24.3 mg (94%) of **25** was obtained as an orange solid. Note that the starting aryl bromide (X4 in Merck informer library) is supplied as a mixture of diastereomers. Flash chromatography did not separate the diastereomers of **25**, and spectral data are reported for the mixture as a result.

**$^1\text{H}$  NMR** (500 MHz,  $\text{CDCl}_3$ )  $\delta$  7.01 – 6.84 (m, 6H), 5.36 – 5.26 (m, 1H), 5.18 (d,  $J = 28.1$  Hz, 1H), 4.81 – 4.77 (m, 1H), 4.72 (s, 1H), 4.59 (s, 1H), 4.56 – 4.53 (m, 1H), 4.49 – 4.30 (m, 1H), 3.78 – 3.72 (m, 4H), 3.78 – 3.59 (m, 1H), 2.52 – 2.37 (m, 1H), 2.29 – 2.16 (m, 1H), 1.49 – 1.39 (m, 9H).

$^{13}\text{C}$  NMR (126 MHz,  $\text{CDCl}_3$ )  $\delta$  173.2, 173.1, 172.9, 172.8, 159.0, 158.9, 157.1, 157.0, 154.4, 154.4, 154.1, 154.0, 153.9, 153.8, 153.7, 153.7, 152.1, 152.1, 151.9, 139.1, 139.1, 139.0, 139.0, 134.8, 134.7, 134.7, 134.6, 134.6, 129.7, 129.7, 129.5, 129.5, 129.3, 129.2, 124.7, 124.5, 124.4, 124.4, 124.3, 124.2, 119.7, 119.7, 119.6, 119.5, 119.5, 118.8, 116.2, 116.2, 116.0, 116.0, 115.4, 115.3, 115.3, 115.2, 115.2, 115.1, 80.6, 73.8, 73.8, 73.2, 73.2, 58.1, 58.0, 57.7, 57.6, 52.8, 52.7, 52.5, 52.4, 52.2, 51.5, 51.0, 51.0, 50.3, 49.8, 37.0, 37.0, 36.1, 36.0, 28.4, 28.3.

**HRMS** (ESI+) Calcd. for  $[\text{C}_{26}\text{H}_{30}\text{F}_2\text{N}_3\text{O}_6^+]$  ( $\text{M}+\text{H}^+$ ), 540.1917; Found, 540.1925.

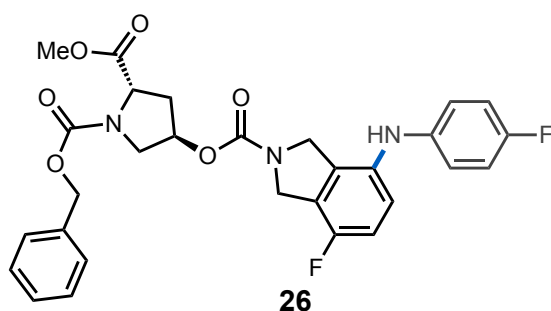

General procedure A was used on 50  $\mu\text{mol}$  scale, and 26.1 mg (98%) of **26** was obtained as an orange solid. Note that the starting aryl bromide (X8 in Merck informer library) is supplied as a mixture of diastereomers. Flash chromatography did not separate the diastereomers of **26**, and spectral data are reported for the mixture as a result.

$^1\text{H}$  NMR (500 MHz,  $\text{CDCl}_3$ )  $\delta$  7.38 – 7.28 (m, 5H), 7.18 (t,  $J = 7.8$  Hz, 1H), 7.07 – 6.92 (m, 5H), 6.86 – 6.77 (m, 1H), 5.38 – 4.96 (m, 4H), 4.74 (s, 1H), 4.69 – 4.42 (m, 4H), 3.93 – 3.73 (m, 4H), 3.56 (d,  $J = 5.2$  Hz, 1H), 2.56 – 2.45 (m, 1H), 2.32 – 2.19 (m, 1H).

$^{13}\text{C}$  NMR (126 MHz,  $\text{CDCl}_3$ )  $\delta$  172.7, 172.7, 172.5, 172.5, 159.4, 159.4, 157.5, 157.5, 154.9, 154.9, 154.3, 153.9, 153.7, 139.3, 139.3, 138.2, 138.1, 138.1, 138.0, 138.0, 137.9, 137.9, 136.3, 136.3, 136.3, 136.2, 129.1, 128.5, 128.1, 128.1, 127.9, 127.9, 125.0, 124.8, 124.8, 124.7, 121.5, 121.4, 121.3, 121.3, 116.2, 116.0, 114.9, 114.8, 114.8, 114.8, 114.4, 114.2, 114.1, 73.6, 73.0, 72.9, 67.4, 58.1, 58.1, 57.8, 57.8, 53.1, 53.0, 53.0, 52.8, 52.7, 52.7, 52.5, 52.3, 51.0, 50.6, 50.5, 37.2, 37.1, 36.1, 36.1.

**HRMS** (ESI+) Calcd. for  $[\text{C}_{29}\text{H}_{29}\text{FN}_3\text{O}_6^+]$  ( $\text{M}+\text{H}^+$ ), 534.2035; Found, 534.2038.

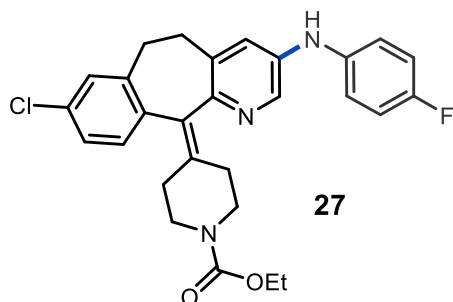

General procedure A was used on 50  $\mu\text{mol}$  scale, and 18.7 mg (76%) of **27** was obtained as an orange solid.

**$^1\text{H}$  NMR** (500 MHz,  $\text{CDCl}_3$ )  $\delta$  8.10 (d,  $J = 2.7$  Hz, 1H), 7.20 – 7.07 (m, 3H), 7.06 – 6.96 (m, 5H), 5.63 (s, 1H), 4.13 (q,  $J = 7.1$  Hz, 2H), 3.82 (d,  $J = 16.1$  Hz, 2H), 3.41 – 3.31 (m, 1H), 3.31 – 3.20 (m, 1H), 3.18 – 3.04 (m, 2H), 2.85 – 2.68 (m, 2H), 2.55 – 2.44 (m, 1H), 2.43 – 2.35 (m, 1H), 2.35 – 2.28 (m, 2H), 1.25 (t,  $J = 7.1$  Hz, 3H).

**$^{13}\text{C}$  NMR** (126 MHz,  $\text{CDCl}_3$ )  $\delta$  158.5 (d,  $J = 241.5$  Hz), 155.5, 148.6, 139.7, 139.3, 138.5, 137.7 (d,  $J = 2.9$  Hz), 137.2, 136.0, 133.8, 133.6, 132.7, 130.2, 128.7, 126.2, 123.8, 121.2 (d,  $J = 7.9$  Hz), 116.2 (d,  $J = 22.6$  Hz), 61.3, 44.9, 44.9, 32.0, 31.5, 30.8, 30.6, 14.7.

**HRMS** (ESI+) Calcd. for  $[\text{C}_{28}\text{H}_{28}\text{ClFN}_3\text{O}_2]^+$  ( $\text{M}+\text{H}^+$ ), 492.1849; Found, 492.1855.

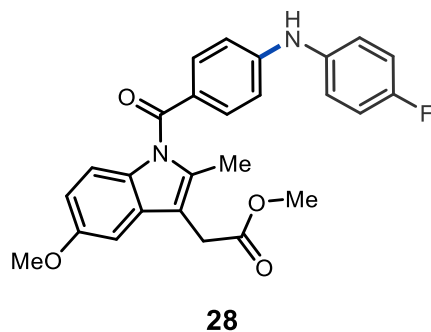

General procedure A was used on 0.25 mmol scale, and 100 mg (90%) of **28** was obtained as a brown solid.

**$^1\text{H}$  NMR** (500 MHz,  $\text{CDCl}_3$ )  $\delta$  7.62 (d,  $J = 9.0$  Hz, 2H), 7.18 – 7.15 (m, 2H), 7.07 – 7.03 (m, 2H), 6.98 – 6.96 (m, 2H), 6.88 (d,  $J = 8.5$  Hz, 2H), 6.67 (dd,  $J = 9.0, 2.5$  Hz, 1H), 6.14 (s, 1H), 3.84 (s, 3H), 3.70 (s, 3H), 3.68 (s, 2H), 2.47 (s, 3H).

$^{13}\text{C}$  NMR (126 MHz,  $\text{CDCl}_3$ )  $\delta$  171.8, 168.9, 159.5 (d,  $J = 242.5$  Hz), 155.7, 149.5, 136.3, 136.3, 132.9, 131.3, 130.3, 125.3, 123.9 (d,  $J = 7.5$  Hz), 116.5 (d,  $J = 22.5$  Hz), 114.8, 113.9, 111.5, 111.1, 101.0, 55.9, 52.2, 30.4, 13.0.

$^{19}\text{F}$  NMR (282 MHz,  $\text{CDCl}_3$ )  $\delta$  -118.2.

HRMS (ESI+) Calcd. for  $[\text{C}_{26}\text{H}_{24}\text{FN}_2\text{O}_4]^+$  ( $\text{M}+\text{H}^+$ ), 447.1715; Found, 447.1720.

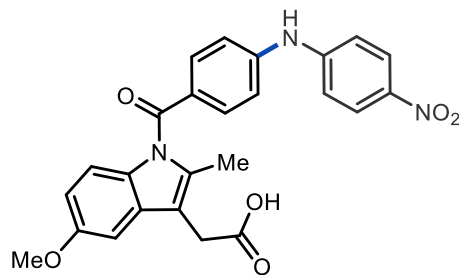

**29**

General procedure B was used (48 h reaction time), except using 2 mol % **1**, on 0.25 mmol scale, and 58.6 mg (51%) of **29** was obtained as a yellow solid.

$^1\text{H}$  NMR (500 MHz,  $\text{DMSO}-d_6$ )  $\delta$  9.78 (s, 1H), 8.18 (d,  $J = 9.5$  Hz, 2H), 7.65 (d,  $J = 8.5$  Hz, 2H), 7.36 (d,  $J = 9.0$  Hz, 2H), 7.31 (d,  $J = 9.0$  Hz, 2H), 7.03 (d,  $J = 2.5$  Hz, 1H), 6.93 (d,  $J = 9.0$  Hz, 1H), 6.71 (dd,  $J = 9.0, 3.0$  Hz, 1H), 3.76 (s, 3H), 3.67 (s, 2H), 2.28 (s, 3H).

$^{13}\text{C}$  NMR (126 MHz,  $\text{DMSO}-d_6$ )  $\delta$  172.3, 168.1, 155.2, 148.6, 145.5, 139.7, 135.3, 131.9, 130.5, 130.4, 127.6, 126.0, 117.8, 116.0, 114.2, 112.5, 111.2, 101.4, 55.4, 29.6, 12.9.

HRMS (ESI+) Calcd. for  $[\text{C}_{25}\text{H}_{22}\text{N}_3\text{O}_6]^+$  ( $\text{M}+\text{H}^+$ ), 460.1503; Found, 460.1505.

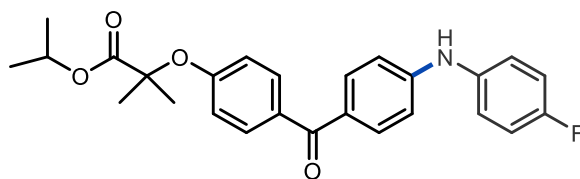

**30**

General procedure B was used (36 h reaction time) on 0.25 mmol scale, and 98.0 mg (90%) of **30** was obtained as a white solid.

**<sup>1</sup>H NMR** (500 MHz, CDCl<sub>3</sub>) δ 7.71 – 7.69 (m, 4H), 7.17 – 7.14 (m, 2H), 7.05 – 7.01 (m, 2H), 6.90 (d, *J* = 10 Hz, 2H), 6.85 (d, *J* = 10 Hz, 2H), 6.21 (s, 1H), 5.08 (hept, *J* = 6.5 Hz, 1H), 1.65 (s, 6H), 1.20 (d, *J* = 6.5 Hz, 6H).

**<sup>13</sup>C NMR** (126 MHz, CDCl<sub>3</sub>) δ 194.2, 173.4, 159.2 (d, *J* = 241.3 Hz), 159.0, 148.7, 136.8 (d, *J* = 2.5 Hz), 132.6, 131.7, 131.7, 128.9, 123.4 (d, *J* = 7.5 Hz), 117.3, 116.3 (d, *J* = 22.5 Hz), 113.8, 79.4, 69.4, 25.5, 21.6.

**<sup>19</sup>F NMR** (282 MHz, CDCl<sub>3</sub>) δ -118.9.

**HRMS** (ESI+) Calcd. for [C<sub>26</sub>H<sub>27</sub>FNO<sub>4</sub><sup>+</sup>] (M+H<sup>+</sup>), 436.1919; Found, 436.1907.

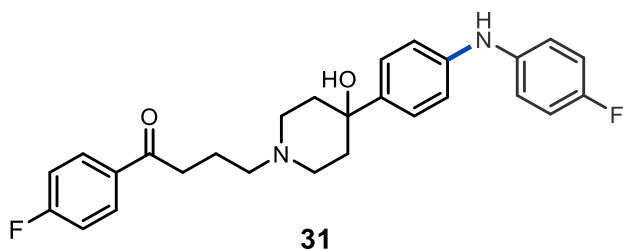

General procedure B was used (48 h reaction time), except using 2 mol % **1**, on 0.25 mmol scale, and 65.3 mg (58%) of **31** was obtained as a white solid. The yield of **31** was 60% as determined by <sup>19</sup>F NMR analysis versus internal standard. The product is poorly soluble in common deuterated solvents.

**<sup>1</sup>H NMR** (500 MHz, DMSO-*d*<sub>6</sub>) δ 8.13 (s, 1H), 8.09 – 8.07 (m, 2H), 7.37 (t, *J* = 9.0, 2H), 7.30 (t, *J* = 8.5, 2H), 7.06 (d, *J* = 6.5, 4H), 6.99 (d, *J* = 8.5, 2H), 6.98 (brs, 1H), 3.36 – 3.17 (m, 10H), 2.02 (s, 2H), 1.72 (s, 2H).

**<sup>13</sup>C NMR** (126 MHz, DMSO-*d*<sub>6</sub>) δ 197.6, 165.0 (d, *J* = 251.7 Hz), 156.2 (d, *J* = 236.0 Hz), 142.4, 140.0, 133.4, 130.9 (d, *J* = 9.6 Hz), 125.6, 118.4 (d, *J* = 7.7 Hz), 115.8, 115.7 (d, *J* = 21.9 Hz), 115.7 (d, *J* = 22.2 Hz), 68.2, 48.5, 35.4, 21.0.

**<sup>19</sup>F NMR** (376 MHz, CD<sub>2</sub>Cl<sub>2</sub>) δ -107.1, -123.2.

**HRMS** (ESI+) Calcd. for [C<sub>27</sub>H<sub>29</sub>FNO<sub>4</sub><sup>+</sup>] (M+H<sup>+</sup>), 451.2192; Found, 451.2193.

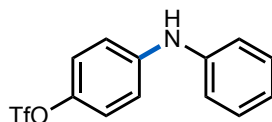

**S1**

General procedure A was used on 0.25 mmol scale, and 72 mg (91%) of **S1** was obtained as a colorless liquid.

$^1\text{H NMR}$  (400 MHz,  $\text{CDCl}_3$ )  $\delta$  7.34–7.30 (m, 2H), 7.15–7.09 (m, 4H), 7.06–7.01 (m, 3H), 5.80 (s, 1H).

$^{13}\text{C NMR}$  (101 MHz,  $\text{CDCl}_3$ )  $\delta$  143.9, 142.8, 141.8, 129.7, 122.7, 122.4, 119.5, 118.9 (d,  $J = 319.3$  Hz), 117.4.

$^{19}\text{F NMR}$  (376 MHz,  $\text{CDCl}_3$ )  $\delta$  -72.8.

**HRMS** (ESI+) Calcd. for  $[\text{C}_{13}\text{H}_{11}\text{F}_3\text{NO}_3\text{S}^+]$  (M+H $^+$ ), 318.0406; Found, 318.0408.

**Table S7. Attempted reactions with primary aliphatic amines.**

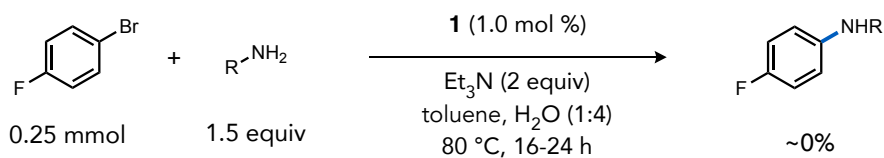

| Entry | R group                         | Yield (%) |
|-------|---------------------------------|-----------|
| 1     | CPh <sub>3</sub>                | 0         |
| 2     | 1-adamantyl                     | 0         |
| 3     | CH <sub>3</sub> CF <sub>3</sub> | 0         |
| 4     | cyclohexyl                      | 0         |
| 5     | benzyl                          | 0         |
| 6     | <i>n</i> -butyl                 | trace     |

Conditions: General Procedure A. Yields determined by  $^{19}\text{F NMR}$  versus internal standard.

## Scale-Up of Synthesis of Fenofibrate Derivative **30**:

**Reaction Conversion Calibration Curve.** To 4 x 8 mL vials was charged fenofibrate (MW 360.83 g/mol; measured purity 98%) and **30** (MW 435.495 g/mol; measured purity 99.5%) according to the values in the Table S6. The mixtures were then dissolved in EtOAc (7 mL), sampled (30 uL in 1.5 mL of 2:1 acetonitrile:water), and assayed via UPLC analysis. The resulting areas of each peak were measured at 304 nm and conversion (%) values were compared to the actual mass conversion values (%).

**Table S8. Tabular data for detector response for substrate and product analytes.**

| Entry | Compound    | Wt. (mg) | Corrected wt. (mg) | mmol            | Measured Area (304 nm) |
|-------|-------------|----------|--------------------|-----------------|------------------------|
| 1     | fenofibrate | 159.4    | 156.212            | 0.4329          | 333319.00              |
|       | <b>30</b>   | 44.9     | 44.6755            | 0.103           | 77607                  |
|       |             |          |                    | conversion: 19% | 19%                    |
| 2     | fenofibrate | 84.2     | 82.516             | 0.228           | 183257                 |
|       | <b>30</b>   | 116      | 115.42             | 0.265           | 203654                 |
|       |             | -        | -                  | conversion: 54% | 53%                    |
| 3     | fenofibrate | 25.7     | 25.186             | 0.0697          | 58840                  |
|       | <b>30</b>   | 194.0    | 193.03             | 0.4432          | 323089                 |
|       |             |          |                    | conversion: 86% | 85%                    |
| 4     | fenofibrate | 5.4      | 5.292              | 0.014           | 16690                  |
|       | <b>30</b>   | 226.8    | 225.666            | 0.5181          | 382633                 |
|       |             | -        | -                  | conversion: 97% | 96%                    |

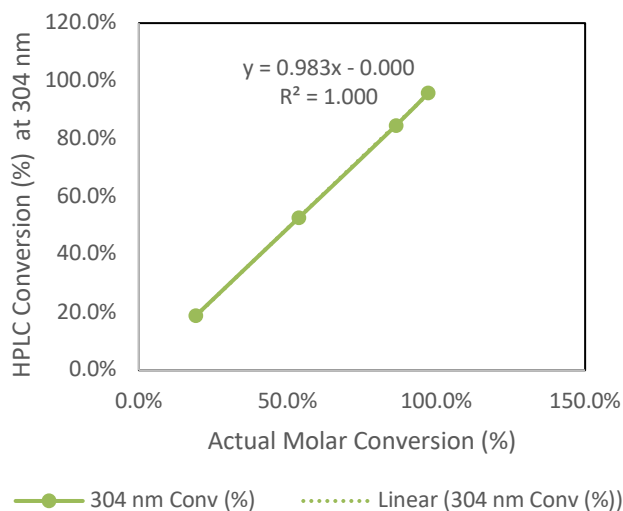

**Figure S3.** Calibration curve of measured versus actual conversion of fenofibrate to **30**.

**Optimization of solvent and temperature in synthesis of 30.** To 8 x 20 mL vials with stir bars outside of the glovebox was charged isopropyl 2-(3-(3-chlorobenzoyl)phenoxy)-2-methylpropanoate (fenofibrate) (530 mg, 1.44 mmol, 98% purity), 4-fluoroaniline (245 mg, 2.16 mmol, 1.5 equiv, 98% purity), and **1** (9.39 mg, 0.013 mmol, 0.9 mol %). The vials were then brought into the glovebox and charged with solvent (1.5 mL), degassed water (6 mL), and triethylamine (405 uL, 2.88 mmol, 2 equiv, 99% purity). The vials were sealed, removed from the glovebox, and placed into a pre-heated hotplate at the specified temperatures and aged for 21 h with vigorous stir bar agitation. Upon cooling, aliquots (50 uL) were taken with continued agitation, diluted into 2:1 acetonitrile:water (7 mL), and assayed for reaction completion using UPLC-MS analysis at 304 nm.

**Table S9. Results of Temperature and Solvent Variation During Synthesis of 30.**

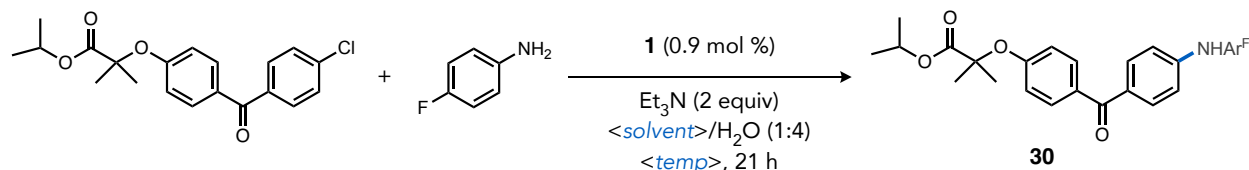

| Entry | Solvent        | Temperature (°C) | Conversion (%) |
|-------|----------------|------------------|----------------|
| 1     | anisole        | 98               | 89             |
| 2     | CPME           | 98               | 98             |
| 3     | <i>t</i> -AmOH | 98               | 96             |
| 4     | toluene        | 98               | 97             |
| 5     | anisole        | 80               | 74             |
| 6     | CPME           | 80               | 71             |
| 7     | <i>t</i> -AmOH | 80               | 94             |
| 8     | toluene        | 80               | 83             |

**Monitoring aqueous pH at initial reaction time.** To a 20 mL vial with stir bar was charged isopropyl 2-(3-(3-chlorobenzoyl)phenoxy)-2-methylpropanoate (fenofibrate) (1.00 g, 2.72 mmol, 98% purity), 4-fluoroaniline (462 mg, 4.07 mmol, 1.5 equiv., 98% purity), *tert*-amyl alcohol (3 mL), degassed water (9 mL), and triethylamine (765 μL, 5.43 mmol, 2 equiv., 99% purity). The vial was agitated for ~10 min where upon the initial pH measurement was obtained (pH = 11.9) using the pH meter, electrode, and calibration procedure (*vide supra*).



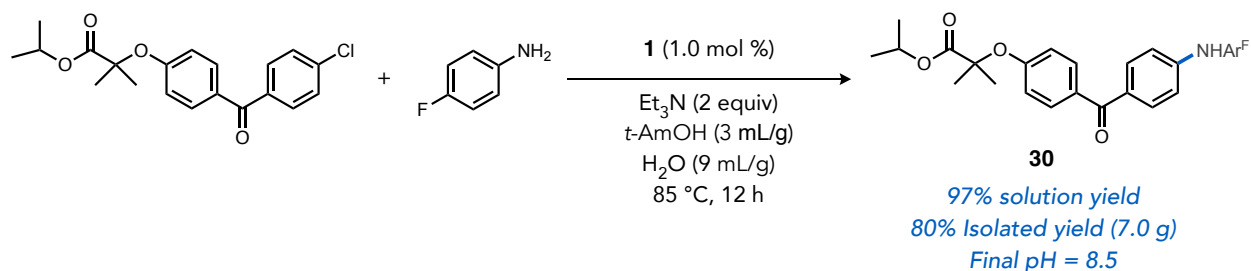

**Synthesis of 30 on 20-mmol Scale.** To a 100 mL 2-piece EasyMax vessel fitted with reflux condenser, pitched blade impeller, and nitrogen inlet was charged isopropyl 2-(3-(3-chlorobenzoyl)phenoxy)-2-methylpropanoate (fenofibrate) (7.36 g, 20.0 mmol, 98% purity) and 4-fluoroaniline (3.40 g, 30.0 mmol, 1.5 equiv, 98% purity). The vessel was sealed and purged with  $\text{N}_2$ . Degassed water (66 mL, 9 mL/g), *t*-Amyl alcohol (22 mL, 3 mL/g, commercially available anhydrous solvent from Millipore Sigma), and degassed triethylamine (5.63 mL, 40.0 mmol, 2 equiv, 99% purity) were charged to the reactor via syringe (inert handling) while keeping the internal temperature at 25 °C with agitation set at 600 RPM. To the reactor was then charged complex **1** (144 mg, 200  $\mu\text{mol}$ , 1 mol %) as a solid under nitrogen purge. The reaction was then ramped to 85 °C over 15 min at 600 RPM agitation rate, aged for 12 h, sampled (50  $\mu\text{L}$  in 7 mL of 2:1 acetonitrile:water), and deemed complete (100% conversion). The reaction mixture was cooled to 25 °C, EtOAc (37 mL, 5 mL/g) was charged, and the mixture was transferred to a separatory funnel with additional EtOAc (37 mL, 5 mL/g). The resulting biphasic solution was separated (aqueous layer loss <0.1%, pH = 8.5), and the organic layer assayed (solution yield = 97%). The resulting dark organic phase was concentrated to a near oil on the rotary evaporator (70-80 mm Hg, 40 °C), and then diluted with EtOAc (37 mL, 5 $\times$  vol.). To the organic mixture was then charged heptanes (22 mL, 3 mL/g), then compound **30** seed crystals (~50 mg), and the resulting slurry was allowed to age (~30 min). Additional heptanes (29 mL, 4 mL/g) was charged to the dark slurry over ~ 20 min. The resulting mixture was allowed to further age (30 min) whereupon it was filtered through a disposable polypropylene filter funnel (10  $\mu\text{m}$ ). The wet cake was slurry washed two times with 20% EtOAc in heptanes (22 mL, 3 mL/g), and the cake was allowed to dry overnight at room temperature under vacuum and a stream of  $\text{N}_2$  to yield **30** as a light gray solid (7.02 g, 16.0 mmol, 80% yield at 99% purity by  $^1\text{H}$  wt/wt NMR).

**HRMS** (ESI+) Calcd. for  $[\text{C}_{26}\text{H}_{27}\text{FNO}_4]^+$  ( $\text{M}+\text{H}^+$ ), 436.1919; Found, 436.1938.

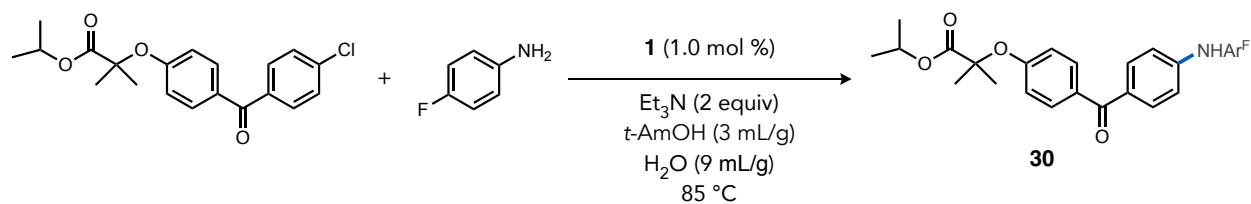

**Kinetic Profile of Reaction on 20-mmol Scale.** To a 100 mL 2-piece EasyMax vessel fitted with reflux condenser, pitched blade impeller, nitrogen inlet, and EasySampler (Fitted with the following solvent lines: Reaction = degassed water; Quench and Diluent = 2:1 acetonitrile:water – non-degassed; Dilution Factor = 350) was charged isopropyl 2-(3-(3-chlorobenzoyl)phenoxy)-2-methylpropanoate (fenofibrate) (7.36 g, 20.0 mmol, 98% purity) and 4-fluoroaniline (3.40 g, 30.0 mmol, 1.5 equiv., 98% purity). The vessel was sealed and purged with N<sub>2</sub>. Degassed water (66 mL, 9 mL/g), *t*-Amyl alcohol (22 mL, 3 mL/g - commercially available anhydrous solvent from Millipore Sigma), and degassed triethylamine (5.63 mL, 40.0 mmol, 2 equiv., 99% purity) were charged to the reactor via syringe (inert handling) keeping the internal temperature at 25 °C with agitation set at 600 RPM. To the reactor was then charged complex **1** (144 mg, 0.200 mmol, 1 mol %) as a solid under nitrogen purge. The sampling times (min), temperature ramp (°C in min), and reaction conversion (%) are tabulated below.

**Table S10. Tabular Data for 20-mmol Scale Amination of Fenofibrate.**

| Entry | Temp Ramp Time (min) | Temp (°C) | Sampling Time (min) | Compound <b>30</b> area (304 nm) | starting material area (304 nm) | Conv. (%) | Comment                             |
|-------|----------------------|-----------|---------------------|----------------------------------|---------------------------------|-----------|-------------------------------------|
| 1     | 0                    | 25        | 2                   | 13272                            | 240538                          | 5%        | Sampling delay of ~2 min            |
| 2     | 15                   | 25        | 17                  | 104215                           | 219975                          | 32%       | Sampled after 17 min at 25 °C       |
| 3     | 30                   | 85        | 32                  | 448567                           | 24593                           | 95%       | Sampled 2 min after reaching 85 °C  |
| 4     | 45                   | 85        | 47                  | 476641                           | 0                               | 100%      | Sampled 17 min after reaching 85 °C |
| 5     | 60                   | 85        | 62                  | 421346                           | 0                               | 100%      | Sampled 32 min after reaching 85 °C |
| 6     | 120                  | 85        | 122                 | 442854                           | 0                               | 100%      | Sampled 1h after reaching 85 °C     |

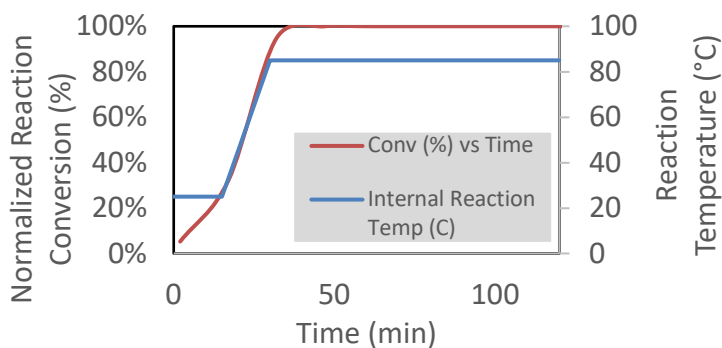

**Figure S4.** Reaction conversion (left-axis) and temperature (right-axis) of fenofibrate to **30** (20-mmol scale) versus time.

**Synthesis of 2 on 17.5-mmol Scale.** To a 100 mL 2-piece EasyMax vessel fitted with reflux condenser, pitched blade impeller, and nitrogen inlet was charged 4-bromo-1,1'-biphenyl (4.16 g, 17.5 mmol, 98% purity), and 4-Nitroaniline (3.70 g, 26.3 mmol, 1.5 equiv, 98% purity). The vessel was sealed and purged with N<sub>2</sub> for at least 10 minutes. Degassed water (70 mL), toluene (15 mL, commercially available anhydrous solvent from Millipore Sigma), and degassed triethylamine (4.93 mL, 35.0 mmol, 2 equiv, 99% purity) were charged to the reactor via syringe (inert handling) with agitation set at 800 RPM. The reactor was then heated to an internal temperature of 80 °C. To a 4 mL vial with PTFE septum and magnetic stir bar was charged complex **1** (126 mg, 0.175 mmol, 1.0 mol %). The vial was then inerted with N<sub>2</sub>, and toluene (2.5 mL) was charged via syringe (inert handling). The slurry was allowed to stir and age (~5 min) whereupon it was charged to the reactor via syringe (inert handling), and the syringe was rinsed with the reactor contents two times. The contents of the reactor were aged (6 h) after which it was deemed complete by UPLC analysis (100% conversion @ 238 nm), cooled to 20 °C and stirred overnight. The resulting orange biphasic slurry was quantitatively transferred to a vessel with EtOAc (150 mL) and *tert*-butylmethylether (100 mL) where the biphasic solution was decanted from the solids, and the top organic layer collected. The remaining orange solids were dissolved in acetone (100 mL), the organic layers were combined, dried over MgSO<sub>4</sub>, filtered through a plug of Silica gel, and concentrated on a rotovap (40 °C) to yield an a crude orange solid. The resulting solid was dissolved in acetone (100 mL) after stirring for several minutes in a water bath (40 °C). To the resulting orange solution was charged water (30 mL) whereupon an orange solid crystallized from solution. Additional water (20 mL) was added to the slurry, allowed to age at room temperature (approximately 10 minutes), filtered, slurry washed two times with 1:1 water:acetone (20 mL) and then toluene (20 mL). The orange wetcake was dried overnight at room temperature with vacuum to yield 4.83g of **2** (94% yield, 99wt% as determined by <sup>1</sup>H NMR) as a bright orange solid. NMR spectroscopic data matched those for a reference sample of **2** (*vide supra*).

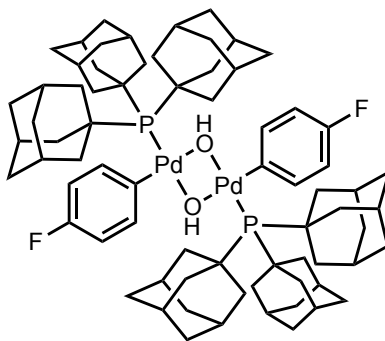

**32**

***anti*-[Pd(PAd<sub>3</sub>)(4-C<sub>6</sub>H<sub>4</sub>F)(μ-OH)]<sub>2</sub> (32).** To an oven-dried 100 mL Schlenk flask equipped with a magnetic stir bar was charged with Pd(PAd<sub>3</sub>)(4-C<sub>6</sub>H<sub>4</sub>F)Br (**1**) (90 mg, 0.13 mmol) and dichloromethane (30 mL). A solution of sodium hydroxide (50 mg, 1.3 mmol, 10 equiv) in water (30 mL) was injected into the reaction mixture. The resulting biphasic solution was stirred vigorously for 30 min at room temperature. The aqueous layer was then separated, the organic layer was concentrated, and resulting was washed with *n*-hexane (3 x 5 mL), filtered and dried under reduced pressure to afford 64 mg (78%) of **32** an off-white solid.

<sup>1</sup>H NMR (500 MHz, CD<sub>2</sub>Cl<sub>2</sub>) δ 7.40 (t, *J* = 7.1 Hz, 4H), 6.63 (t, *J* = 9.2 Hz, 4H), 2.42 (s, 36H), 1.88 (s, 18H), 1.72 - 1.57 (m, 36H), -2.19 (d, *J* = 3.2 Hz, 2H).

<sup>13</sup>C NMR (126 MHz, CD<sub>2</sub>Cl<sub>2</sub>) δ 160.91 (d, *J* = 238.0 Hz), 139.96, 138.68, 112.48 (d, *J* = 18.5 Hz), 48.83 (d, *J* = 5.1 Hz), 42.02, 36.97, 29.84 (d, *J* = 7.5 Hz).

<sup>19</sup>F NMR (470 MHz, CD<sub>2</sub>Cl<sub>2</sub>) δ -125.2.

<sup>31</sup>P {<sup>1</sup>H} NMR (202 MHz, CD<sub>2</sub>Cl<sub>2</sub>) δ 67.1.

HRMS (ESI) *m/z* calculated for C<sub>38</sub>H<sub>52</sub>FNPPd (M/2-OH+MeCN), 678.28562, found 678.28588.

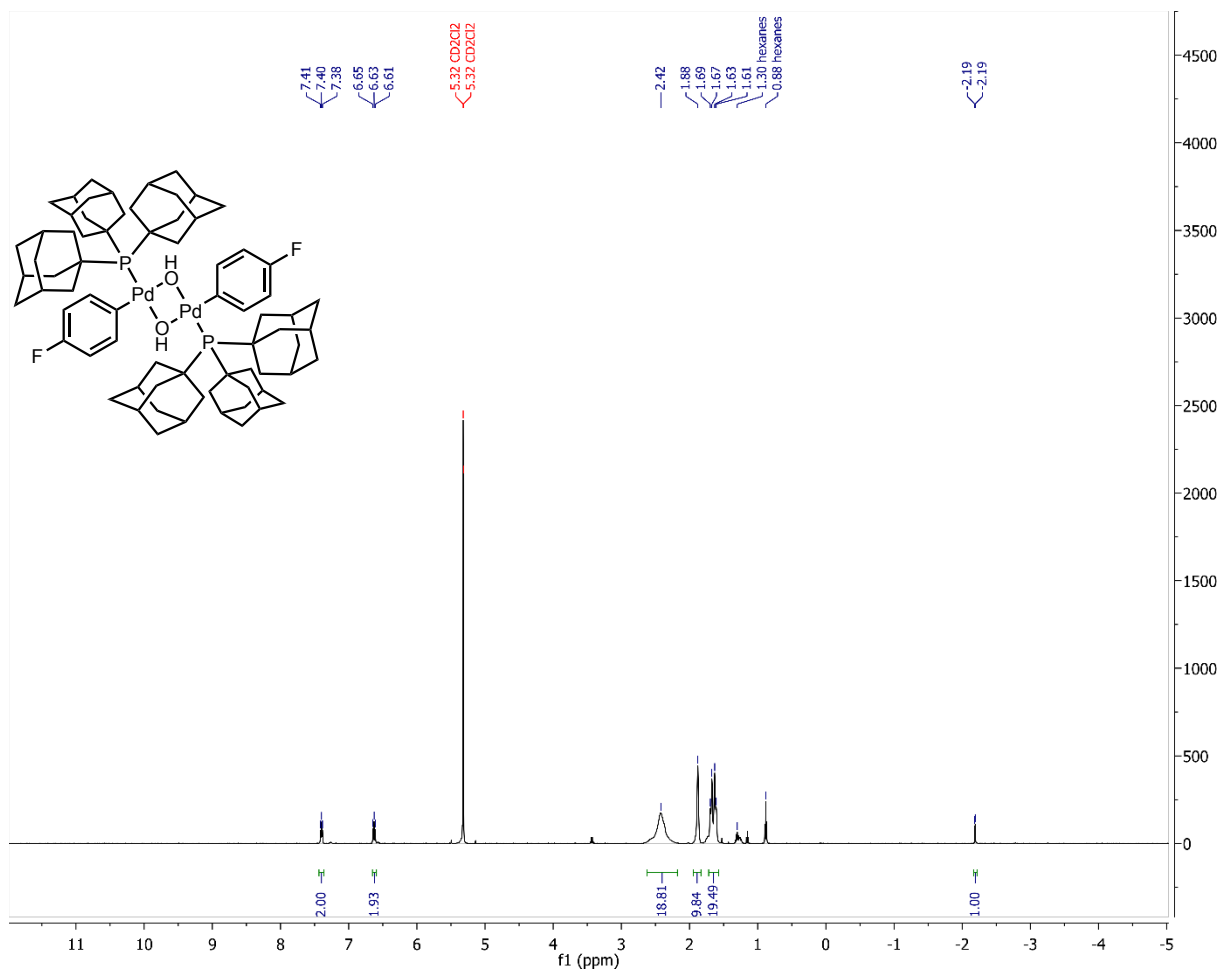

**Figure S5.**  $^1\text{H}$  NMR spectrum (CD $_2$ Cl $_2$ , 500 MHz) of **32**.

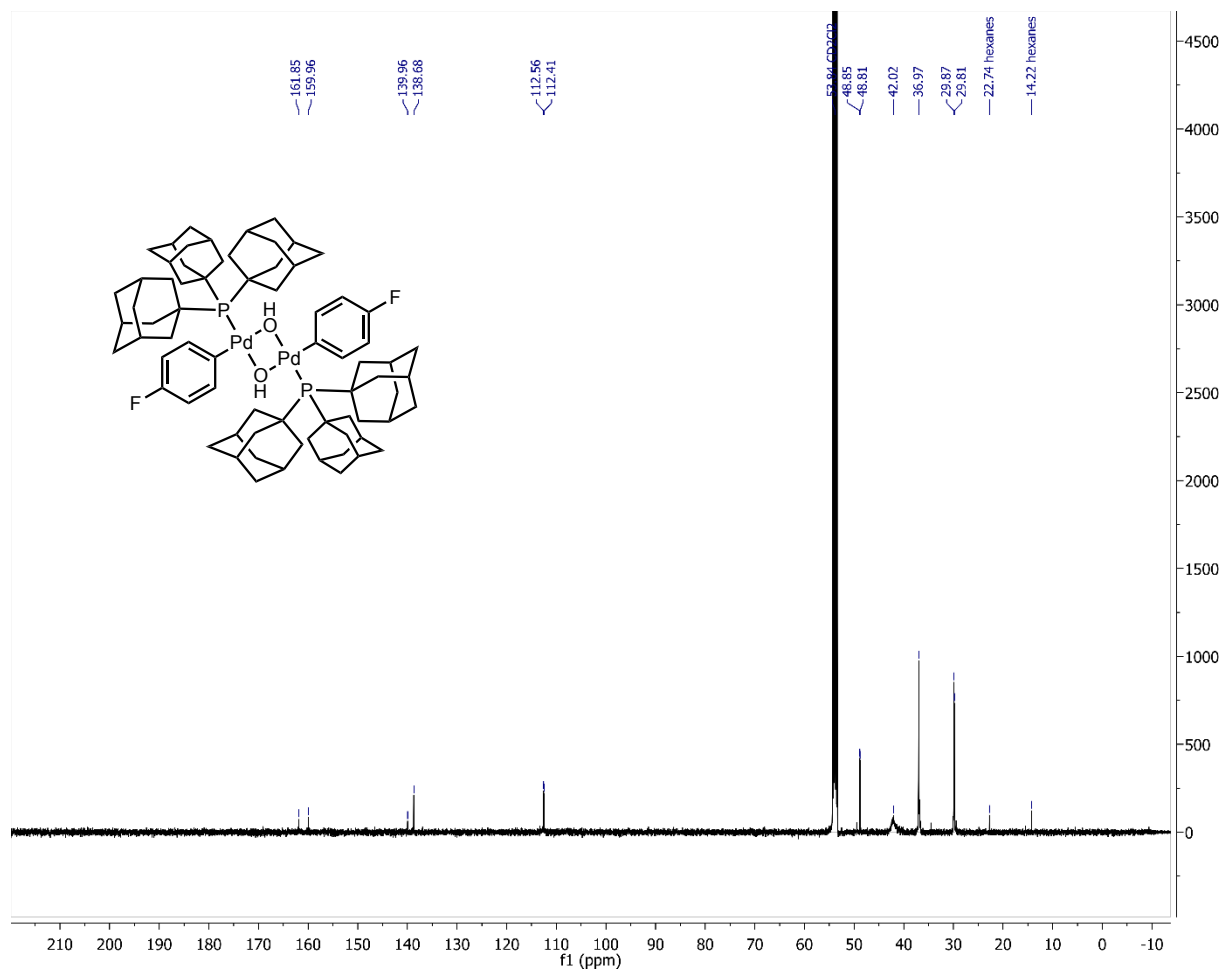

**Figure S6.**  $^{13}\text{C}$  NMR spectrum ( $\text{CD}_2\text{Cl}_2$ , 126 MHz) of **32**.

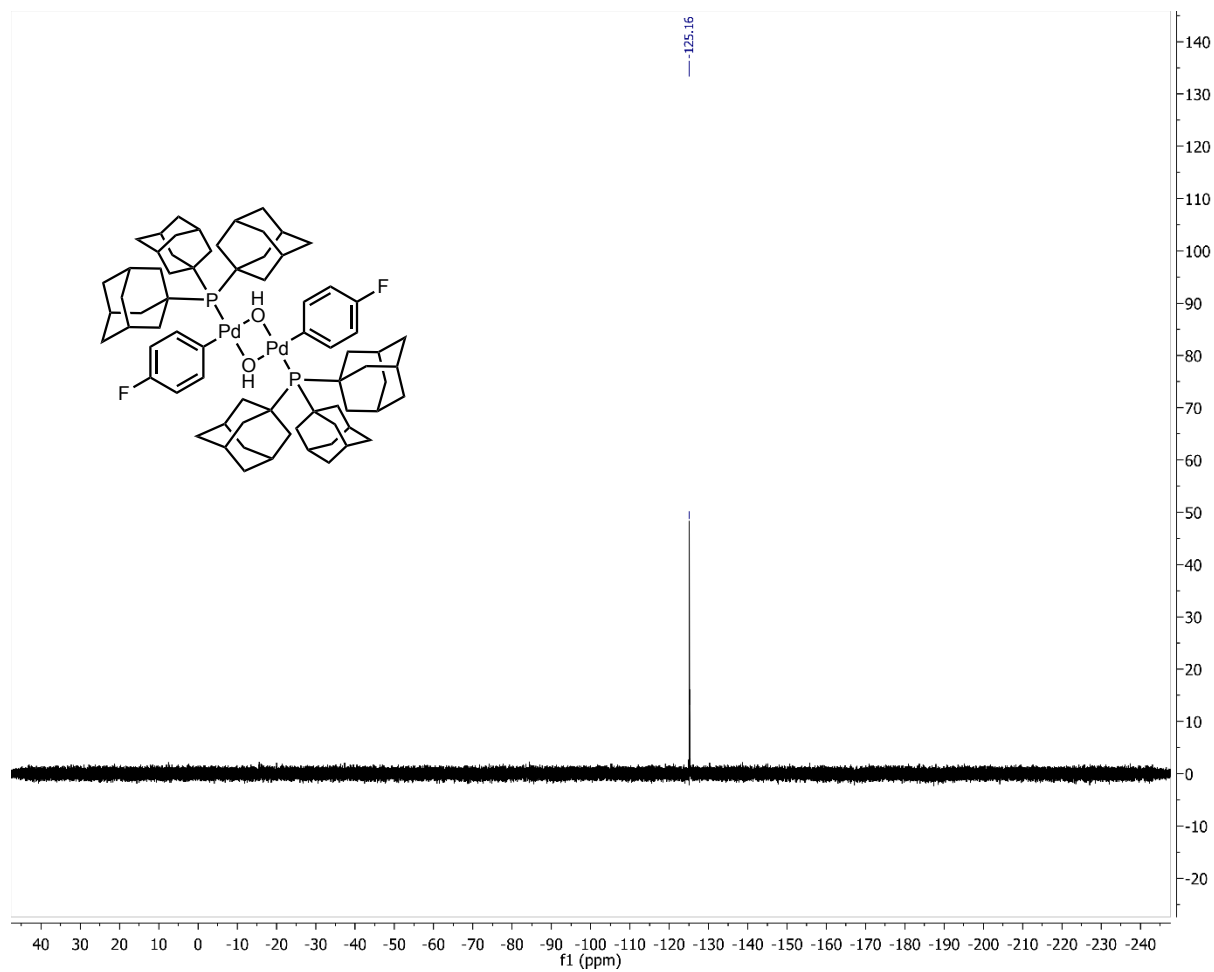

**Figure S7.**  $^{19}\text{F}$  NMR spectrum ( $\text{CD}_2\text{Cl}_2$ , 470 MHz) of **32**.

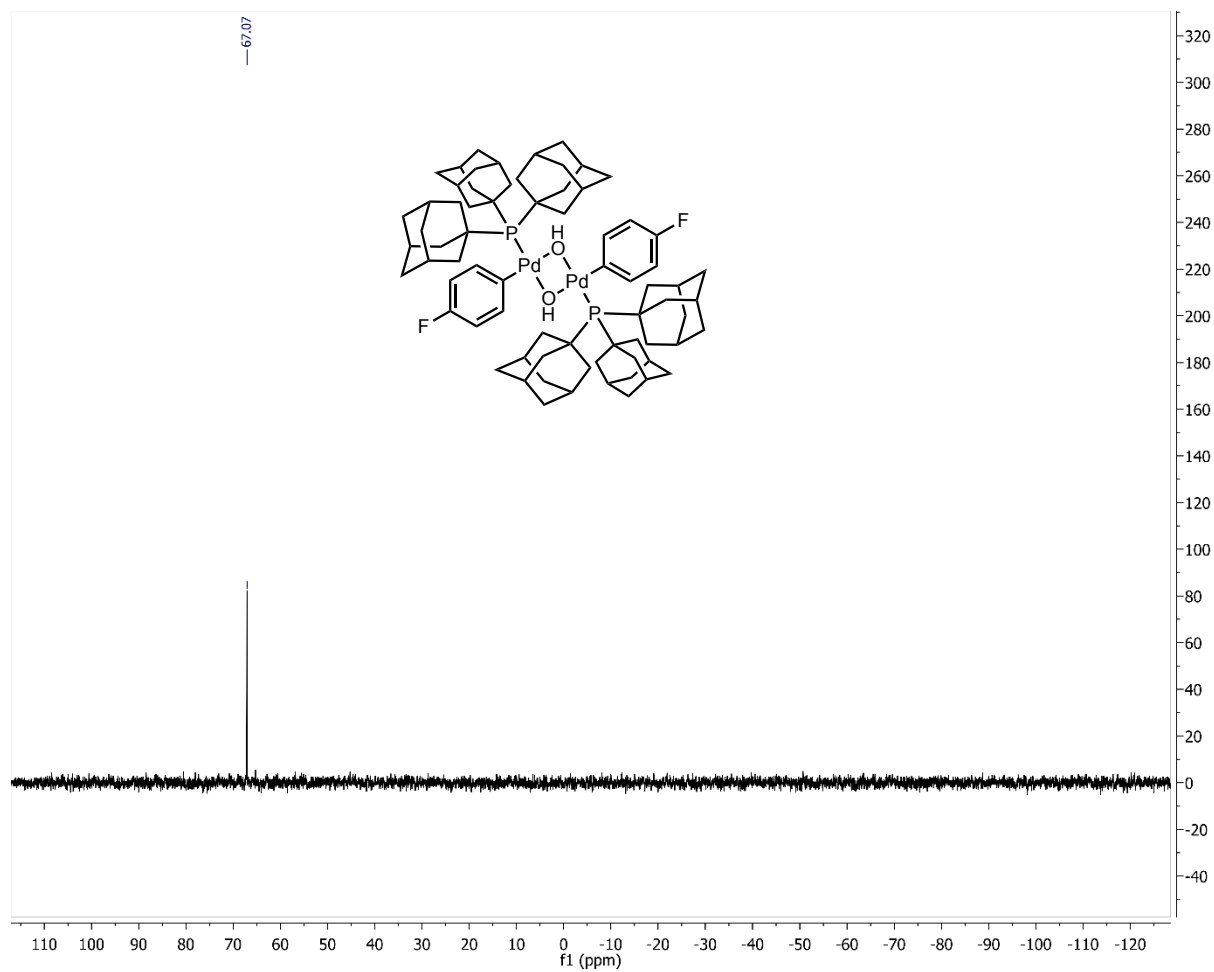

**Figure S8.**  $^{31}\text{P}\{^1\text{H}\}$  NMR spectrum ( $\text{CD}_2\text{Cl}_2$ , 202 MHz) of **32**.



### Stoichiometric Mechanistic Experiments:

Independent route to **32** under catalytically-relevant conditions. A solution of Pd(PAd<sub>3</sub>)(4-C<sub>6</sub>H<sub>4</sub>F)Br (**1**) (1.8 mg, 2.5 μmol) in toluene (1.0 mL) was transferred to an NMR tube capped with a rubber septum. Triethylamine (50 μL, 359 μmol, 143 equiv) and water (1.0 mL) were injected and the reaction mixture was shaken gently for 1 min at room temperature. A <sup>31</sup>P{<sup>1</sup>H} spectrum of the resulting solution indicated complete consumption of **1**, and **32** was cleanly formed. Analogous reactions that omitted water or triethylamine showed no conversion of **1**.

<sup>31</sup>P{<sup>1</sup>H} NMR (202 MHz, toluene) δ 66.9.

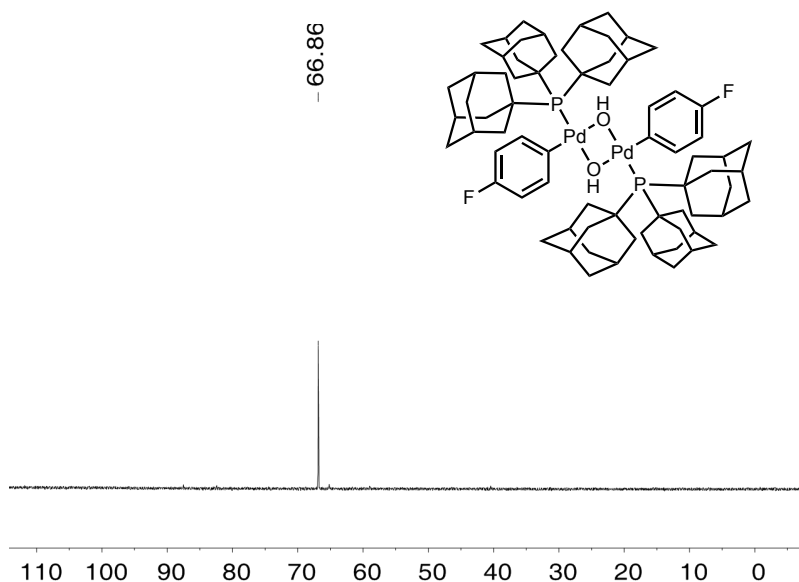

**Figure S9.** <sup>31</sup>P{<sup>1</sup>H} NMR spectrum (202 MHz, toluene) of reaction of **1** with Et<sub>3</sub>N and water in toluene after 1 min at RT.

**Independent route to **32** from an independently prepared cationic aryl-Pd complex:**

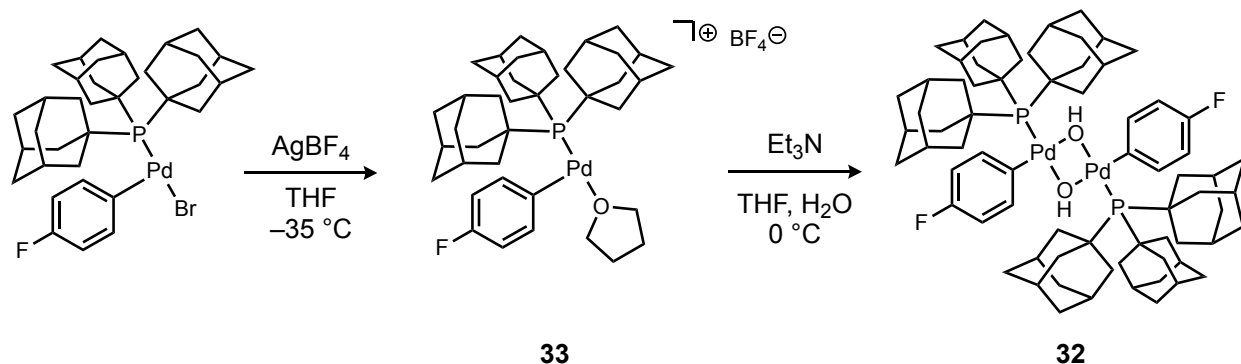

**Generation of [Pd(PAd<sub>3</sub>)(4-FC<sub>6</sub>H<sub>4</sub>)]<sup>+</sup> BF<sub>4</sub><sup>-</sup> (**33**).** The generation of **33** was adapted from a published procedure.<sup>3</sup> Pd(PAd<sub>3</sub>)(*p*-FC<sub>6</sub>H<sub>4</sub>)Br **1** (9.0 mg, 12.5 μmol) was dissolved in THF (2.5 mL). Separately, AgBF<sub>4</sub> (20 mg, 0.10 mmol) was dissolved in THF (2 mL). Both solutions were chilled at -35 °C (MeOH/H<sub>2</sub>O dry ice bath). The latter solution (AgBF<sub>4</sub>, 2.5 μmol, 50 μL) was then added to an aliquot of the solution of **1** (2.5 μmol, 0.5 mL) in a 4 mL vial at -35 °C. The mixture (0.55 mL) was quickly shaken, left in the cooling bath for 10 min, and transferred under nitrogen into an NMR tube capped with a rubber septum. Generation of **33** was confirmed by <sup>31</sup>P{<sup>1</sup>H} spectrum at -25 °C before proceeding to the next step.

**Generation of **32** from **33**.** Triethylamine (10 μL, 72 μmol, 29 equiv) and water (68 μL) were injected into the solution of **33** and the resulting mixture was shaken gently for 1 min at 0 °C. A <sup>31</sup>P{<sup>1</sup>H} spectrum was acquired at 0 °C, which showed full conversion of **33** and clean formation of **32**.

<sup>31</sup>P{<sup>1</sup>H} NMR (202 MHz, THF, 0 °C) δ 66.2.

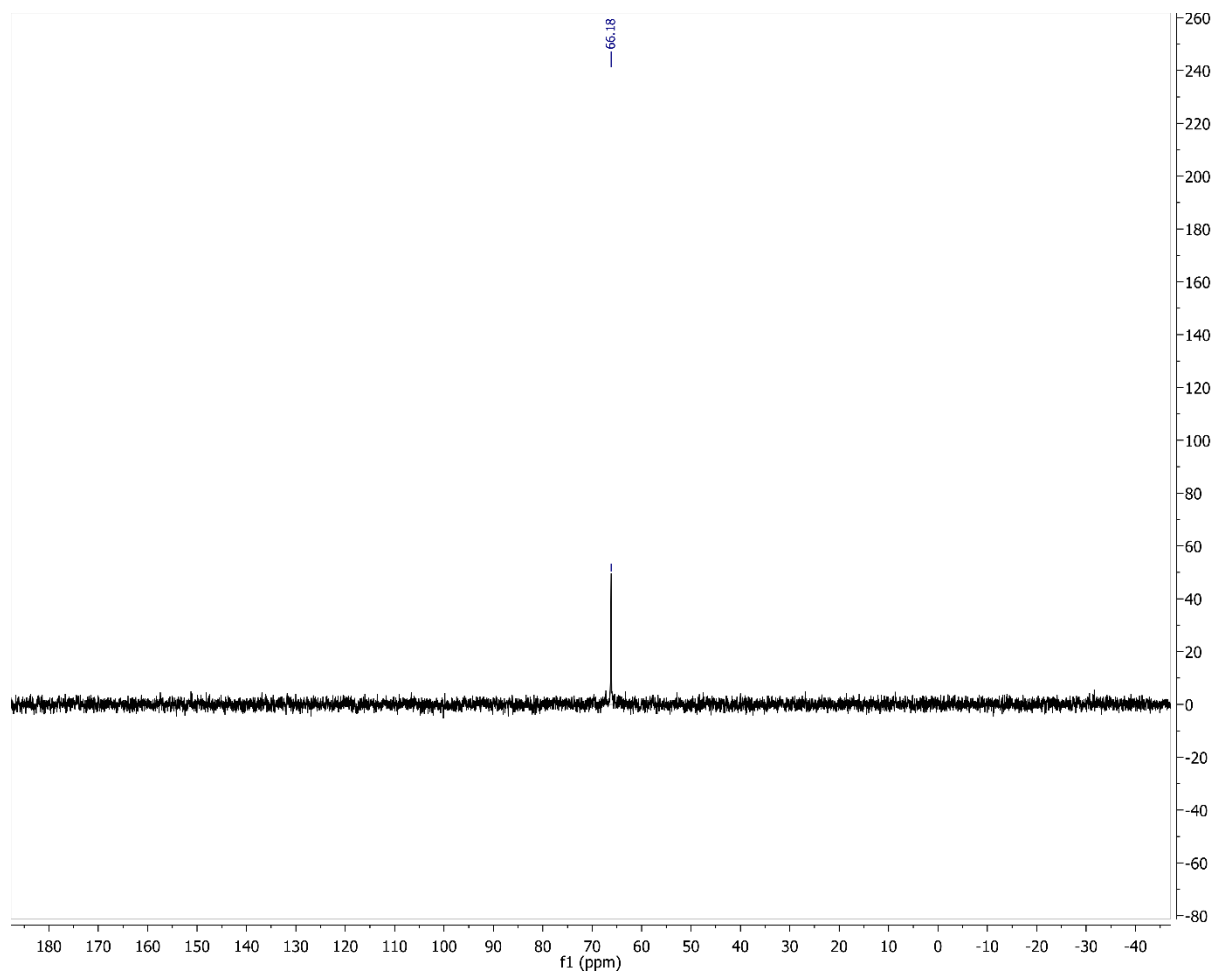

**Figure S10.**  $^{31}\text{P}\{^1\text{H}\}$  NMR spectrum (202 MHz, THF, 0 °C) of the reaction of **33** with  $\text{Et}_3\text{N}$  and  $\text{H}_2\text{O}$  in THF.

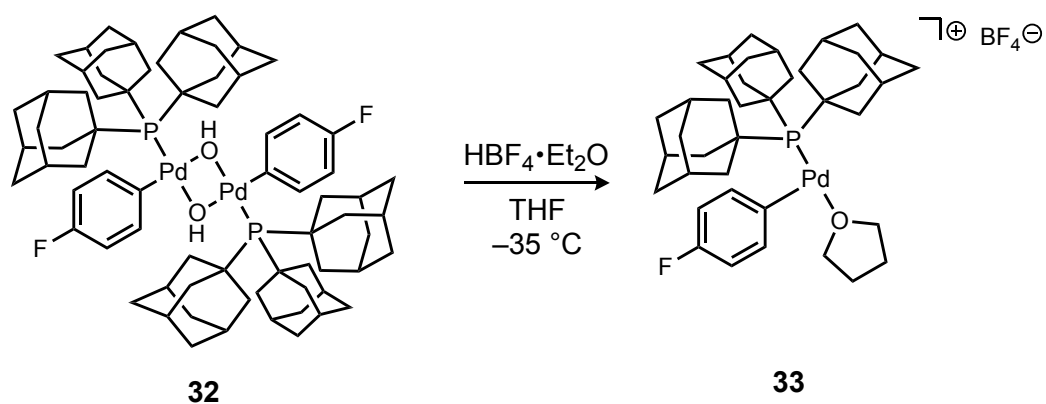

**Conversion of 32 to 33.** A solution of **32** (1.8 mg, 1.34  $\mu\text{mol}$ ) in  $\text{THF-}d_8$  (0.5 mL) was transferred to an NMR tube capped with a rubber septum. Tetrafluoroboric acid diethyl ether complex (0.5  $\mu\text{L}$ , 3.7  $\mu\text{mol}$ , 1.3 equiv to Pd) was injected and the reaction mixture was shaken gently for 1 min at  $-35\text{ }^\circ\text{C}$ .  $^1\text{H}$ ,  $^{19}\text{F}$ , and  $^{31}\text{P}\{^1\text{H}\}$  NMR spectra acquired at  $-25\text{ }^\circ\text{C}$ , which indicated full conversion of **32** and clean formation of **33**.<sup>3</sup>

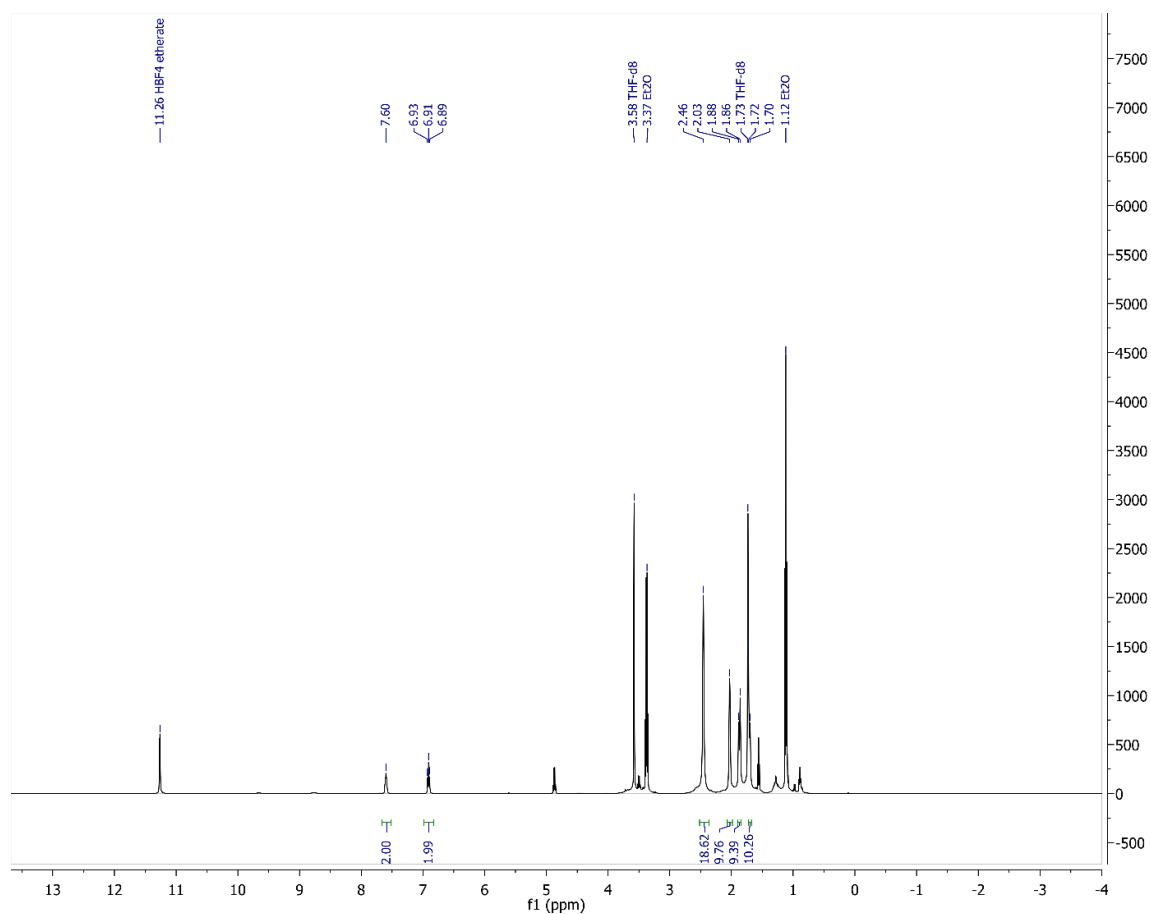

**Figure S11.**  $^1\text{H}$  NMR spectrum (500 MHz,  $\text{THF-}d_8$ ) of the mixture generated by reaction of **32** with  $\text{HBF}_4 \cdot \text{Et}_2\text{O}$  in THF at  $-35\text{ }^\circ\text{C}$ .

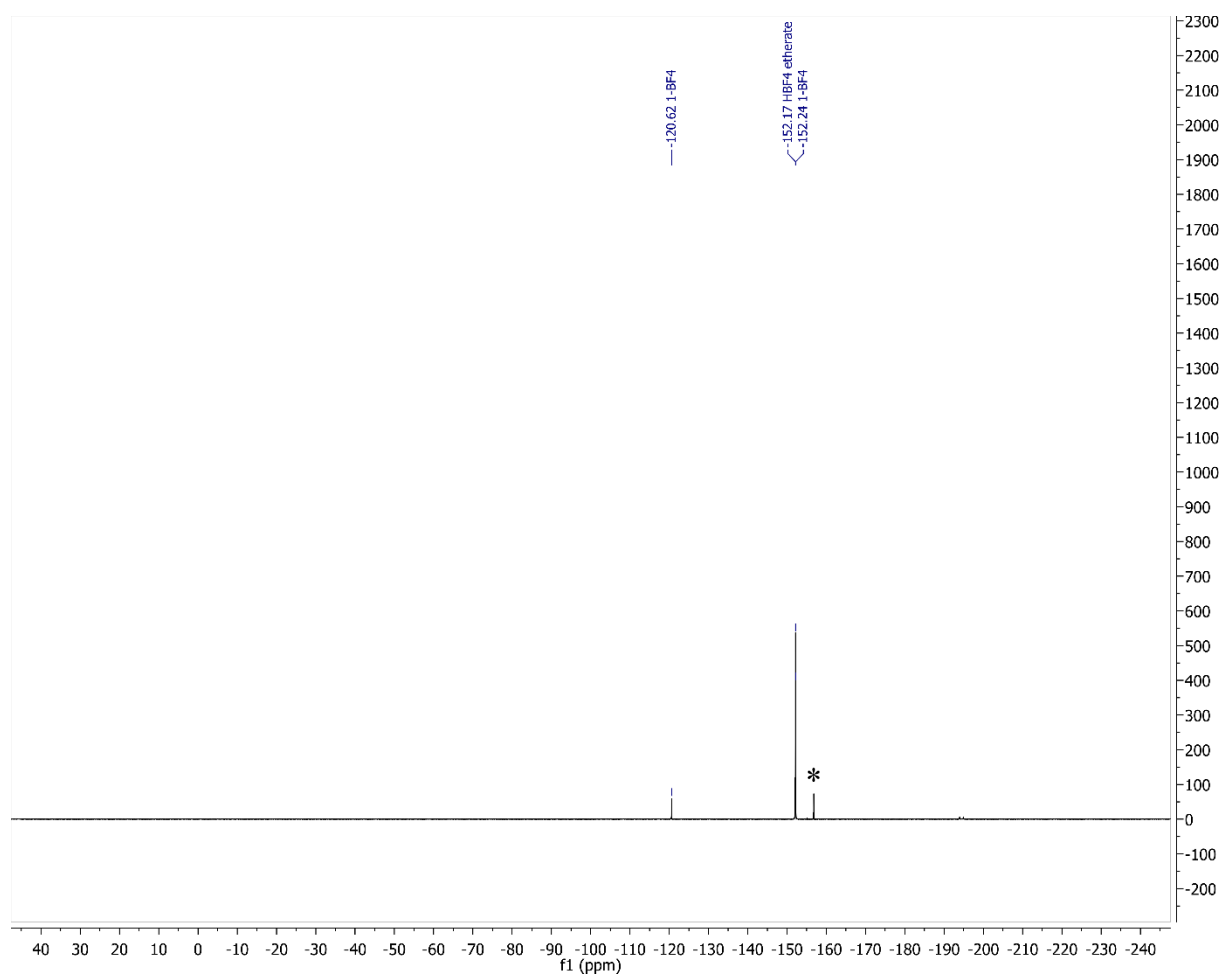

**Figure S12.**  $^{19}\text{F}$  NMR spectrum (470 MHz,  $\text{THF-}d_8$ ) of the mixture generated by reaction of **32** with  $\text{HBF}_4\cdot\text{Et}_2\text{O}$  in THF at  $-35\text{ }^\circ\text{C}$  (\* = unidentified).

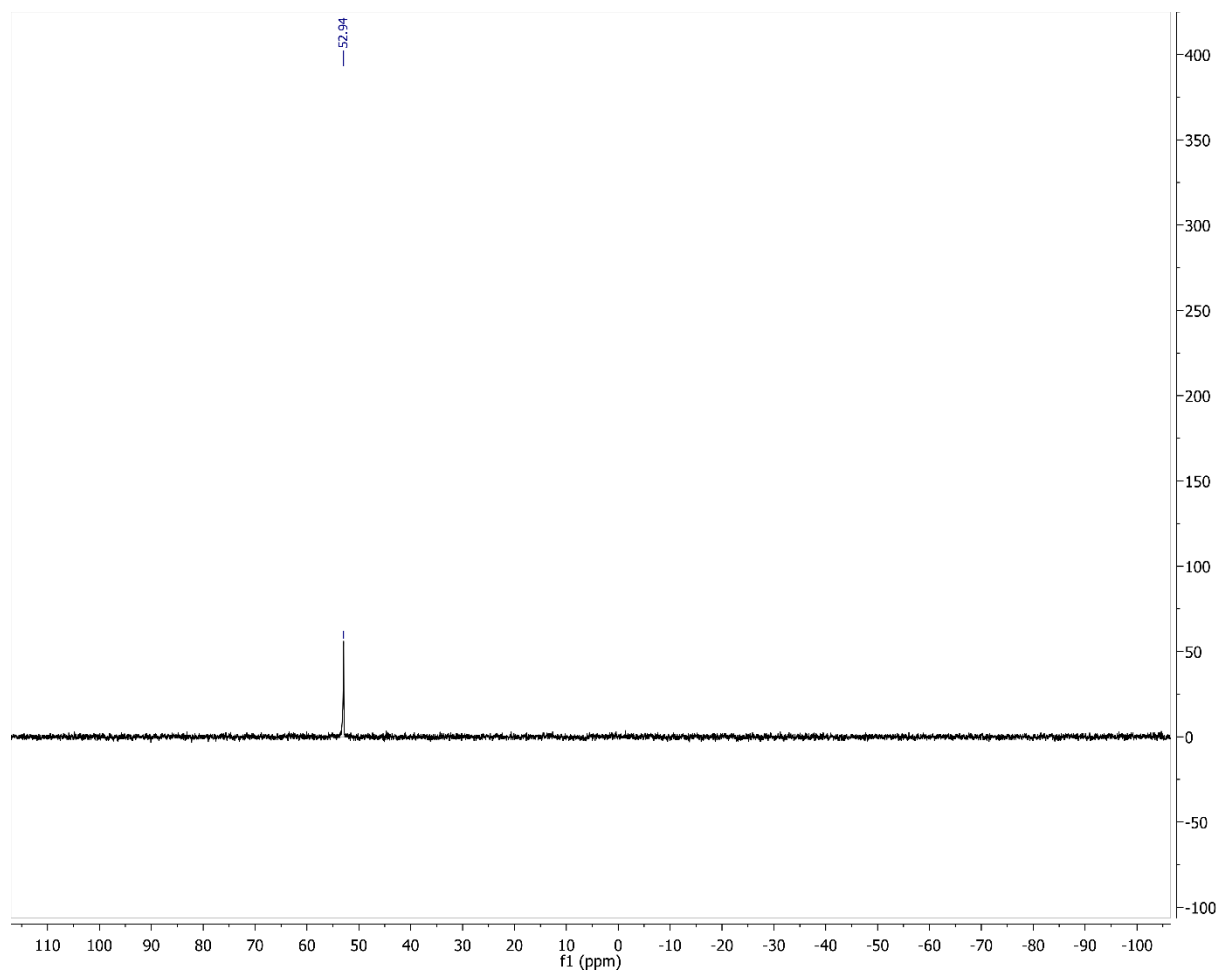

**Figure S13.**  $^{31}\text{P}\{^1\text{H}\}$  NMR spectrum (202 MHz,  $\text{THF-}d_8$ ) of the mixture generated by reaction of **32** with  $\text{HBF}_4 \cdot \text{Et}_2\text{O}$  in THF at  $-35\text{ }^\circ\text{C}$  .

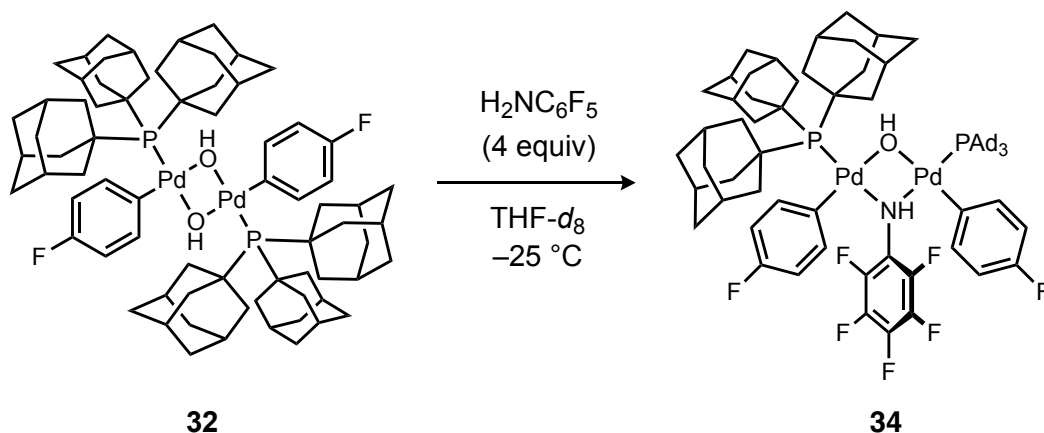

**Synthesis and characterization of catalyst resting state, *syn*-[Pd<sub>2</sub>(PAd<sub>3</sub>)<sub>2</sub>(4-C<sub>6</sub>H<sub>4</sub>F)<sub>2</sub>(μ-OH)(μ-NH<sub>2</sub>C<sub>6</sub>F<sub>5</sub>)] (**34**).** A solution of **32** (4.9 mg, 3.8 μmol) in THF-*d*<sub>8</sub> (0.5 mL) was transferred to an NMR tube under nitrogen and capped with a rubber septum. Separately, pentafluoroaniline (2.8 mg, 15 μmol, 4 equiv) was dissolved in THF-*d*<sub>8</sub> (0.1 mL) in a 4 mL vial, and the resulting solution was added to the solution of **32** via a 1 mL syringe at low temperature (acetone/dry ice bath). The NMR tube was then shaken gently for 1 min. <sup>1</sup>H, <sup>19</sup>F, and <sup>31</sup>P{<sup>1</sup>H} NMR spectra acquired at -25 °C indicated full conversion of **32** and clean formation of **34**. An EXSY NMR analysis indicated exchange between free C<sub>6</sub>F<sub>5</sub>NH<sub>2</sub> and the μ-anilido ligand in **34** during NMR time scale suggesting formation of **34** can occur reversibly.

<sup>1</sup>H NMR (500 MHz, THF-*d*<sub>8</sub>) δ 7.33 (t, *J* = 7.2 Hz, 2H), 6.51 (td, *J* = 8.9, 3.1 Hz, 2H), 6.46 (t, *J* = 7.6 Hz, 2H), 6.20 (td, *J* = 8.7, 3.1 Hz, 2H), 2.74 (s, 2H), 2.70 – 2.53 (m, 36H), 2.46 – 2.27 (m, 18H), 2.03 – 1.58 (m, 36H, partly obscured by THF residual peak), -3.84 (s, 1H).

<sup>19</sup>F NMR (470 MHz, THF-*d*<sub>8</sub>) δ -125.09 (2F), -147.73 (1F), -158.18 (1F), -170.71 (1F), -171.42 (1F), -176.06 (1F).

<sup>31</sup>P{<sup>1</sup>H} NMR (202 MHz, THF-*d*<sub>8</sub>) δ 58.8.

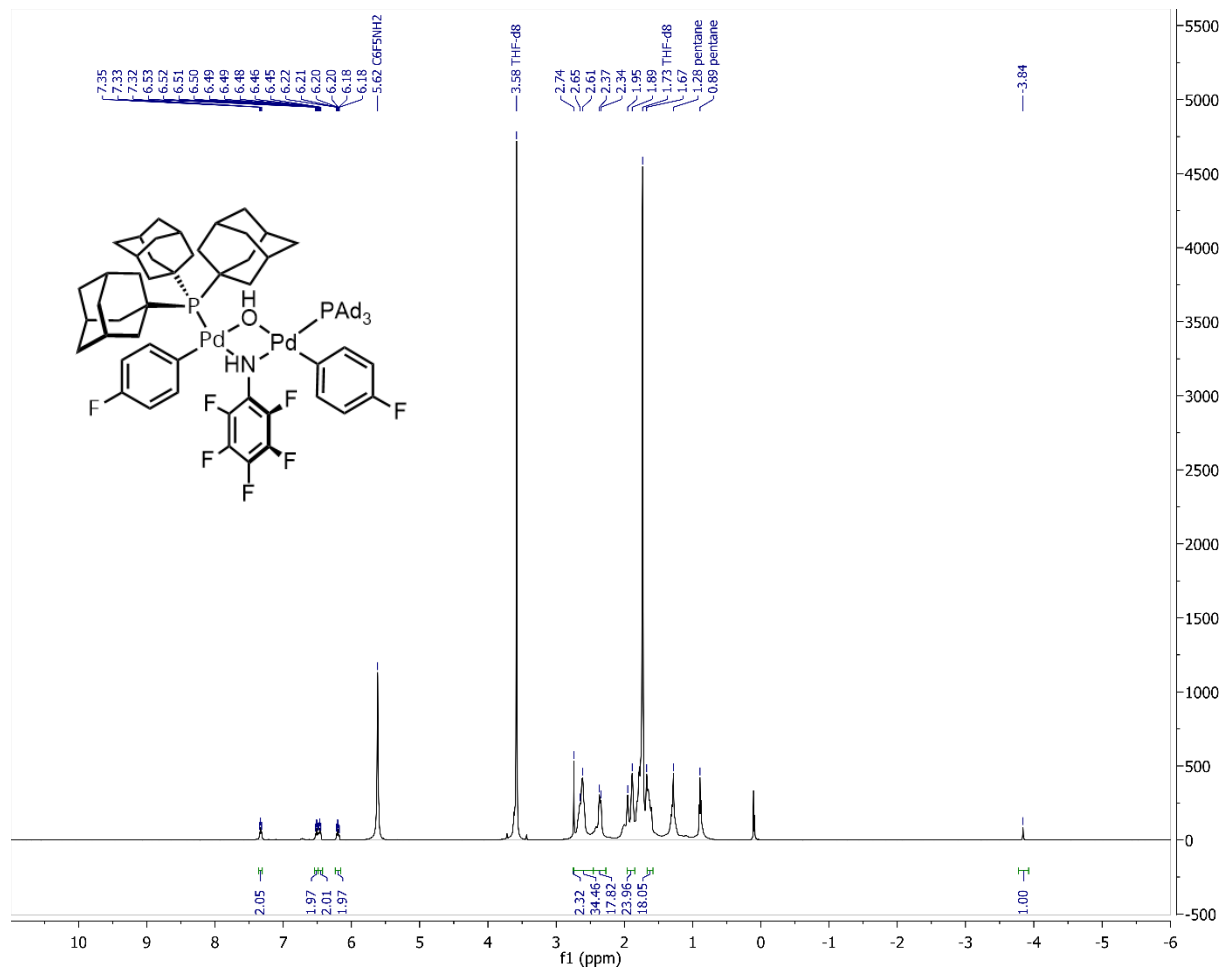

**Figure S14.** <sup>1</sup>H NMR spectrum (500 MHz, THF-*d*<sub>8</sub>) of **34**.



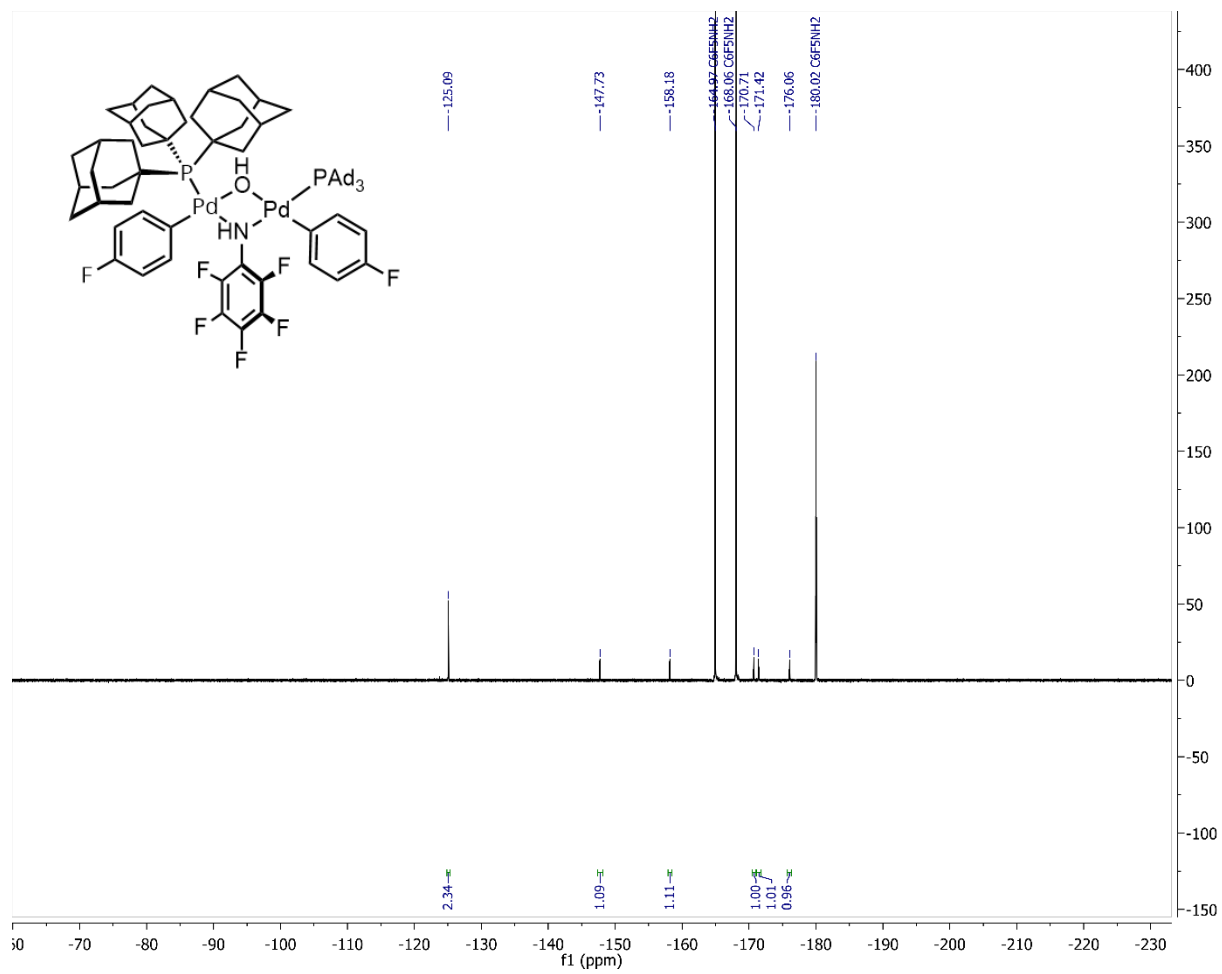

**Figure S15.**  $^{19}\text{F}$  NMR spectrum (470 MHz,  $\text{THF-}d_8$ ) of **34**.

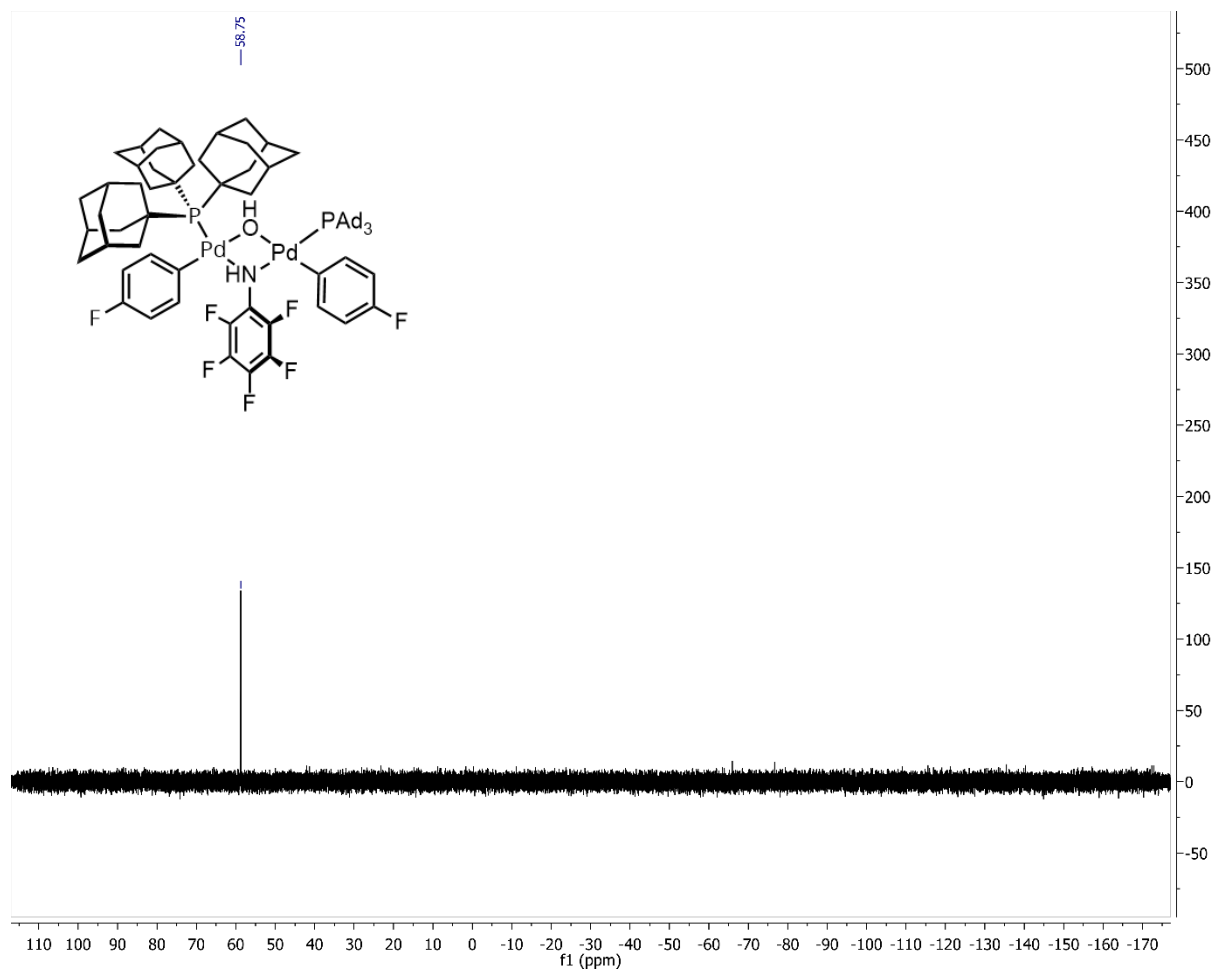

**Figure S16.**  $^{31}\text{P}\{^1\text{H}\}$  NMR spectrum (202 MHz,  $\text{THF-}d_8$ ) of **34**.

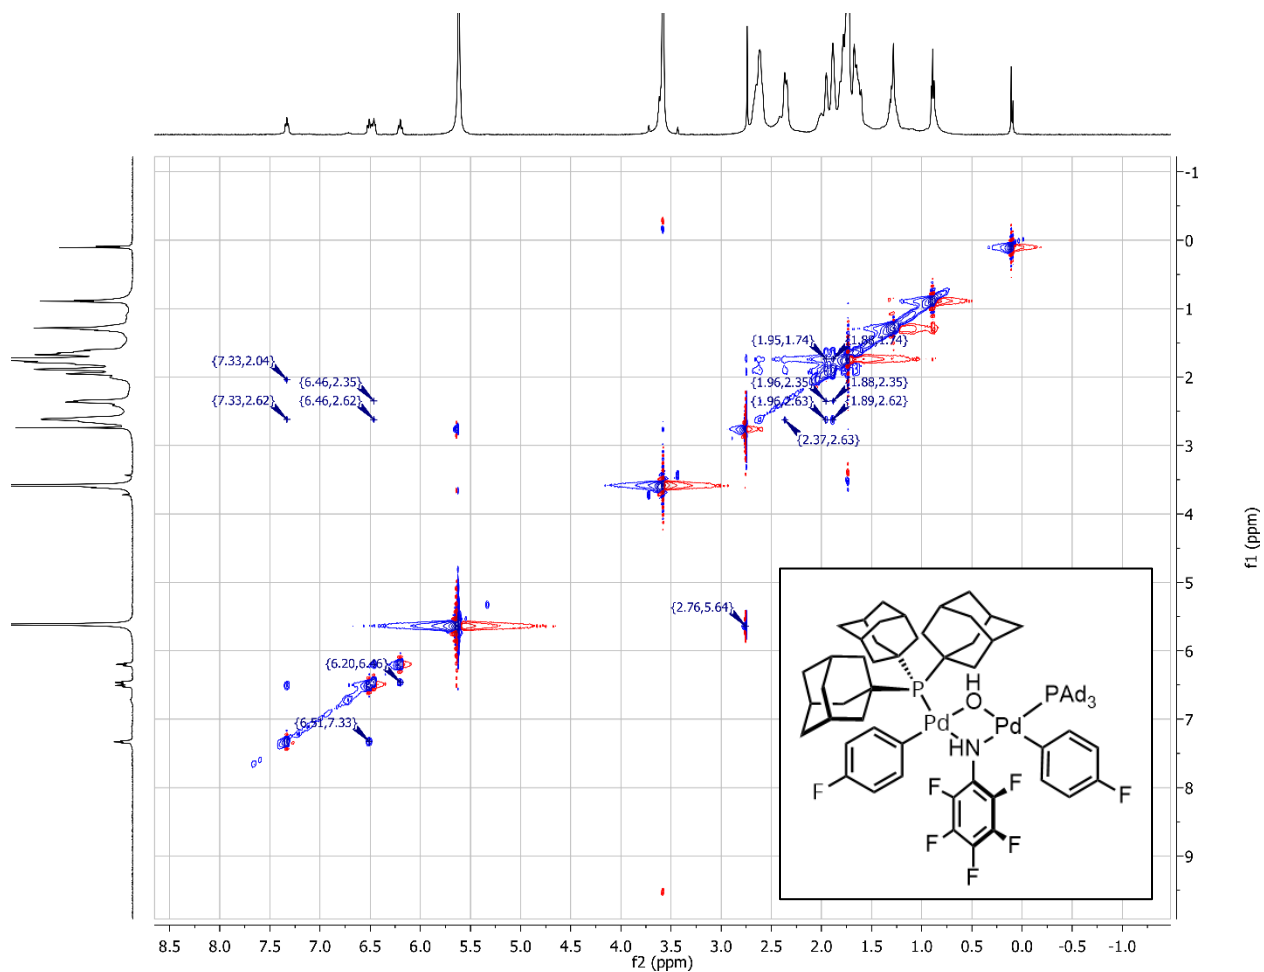

**Figure S17.**  $^1\text{H}$ - $^1\text{H}$  NOESY/EXSY NMR spectrum (500 MHz,  $\text{THF-}d_8$ ) of **34**.

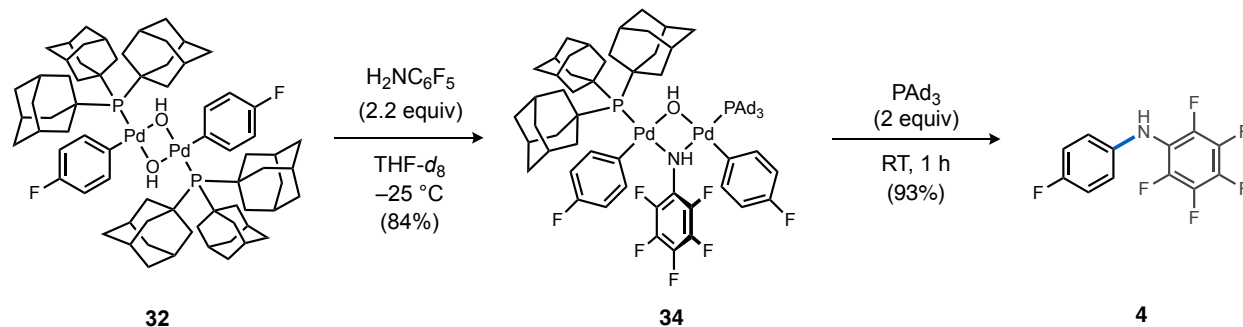

**Stoichiometric C–N bond formation from resting state complex 34.** In a glove box, **32** (3.3 mg, 2.5  $\mu\text{mol}$ ) and octafluorotoluene (internal standard, 15  $\mu\text{L}$ , 106  $\mu\text{mol}$ ) were dissolved in THF (0.5 mL) in a 4 mL vial. The resulting solution was transferred into an NMR tube capped with a rubber septum. Separately, pentafluoroaniline (10 mg, 55  $\mu\text{mol}$ ) was dissolved in THF (1 mL) in a 4 mL vial, and the resulting solution (0.1 mL, 5.5  $\mu\text{mol}$ , 2.2 equiv) was drawn into a 1 mL syringe. A solution of  $\text{PAd}_3$  (4.4 mg, 10  $\mu\text{mol}$ ) in THF (0.2 mL) was drawn into another 1 mL syringe. The syringe needles were sealed by insertion into a rubber septum to prevent exposure to air. Both the NMR tube and syringes were taken out of the box, and the  $\text{C}_6\text{F}_5\text{NH}_2$  solution was then injected into the NMR tube cooled in an acetone/dry ice bath. The NMR tube was shaken gently for 1 min after the addition.  $^{19}\text{F}$  and  $^{31}\text{P}\{^1\text{H}\}$  NMR spectra acquired at  $-25\text{ }^\circ\text{C}$ , which confirmed full conversion of **32** and formation of **34** (84%). Next, the  $\text{PAd}_3$  solution (to stabilize  $(\text{Ad}_3\text{P})\text{Pd}^0$ ) was injected into the NMR tube at  $-78\text{ }^\circ\text{C}$ , and the mixture was warmed up to room temperature.  $^{19}\text{F}$  and  $^{31}\text{P}\{^1\text{H}\}$  NMR spectra acquired after 1 h, which indicated full conversion of **34** and formation of **4** in 93% yield.

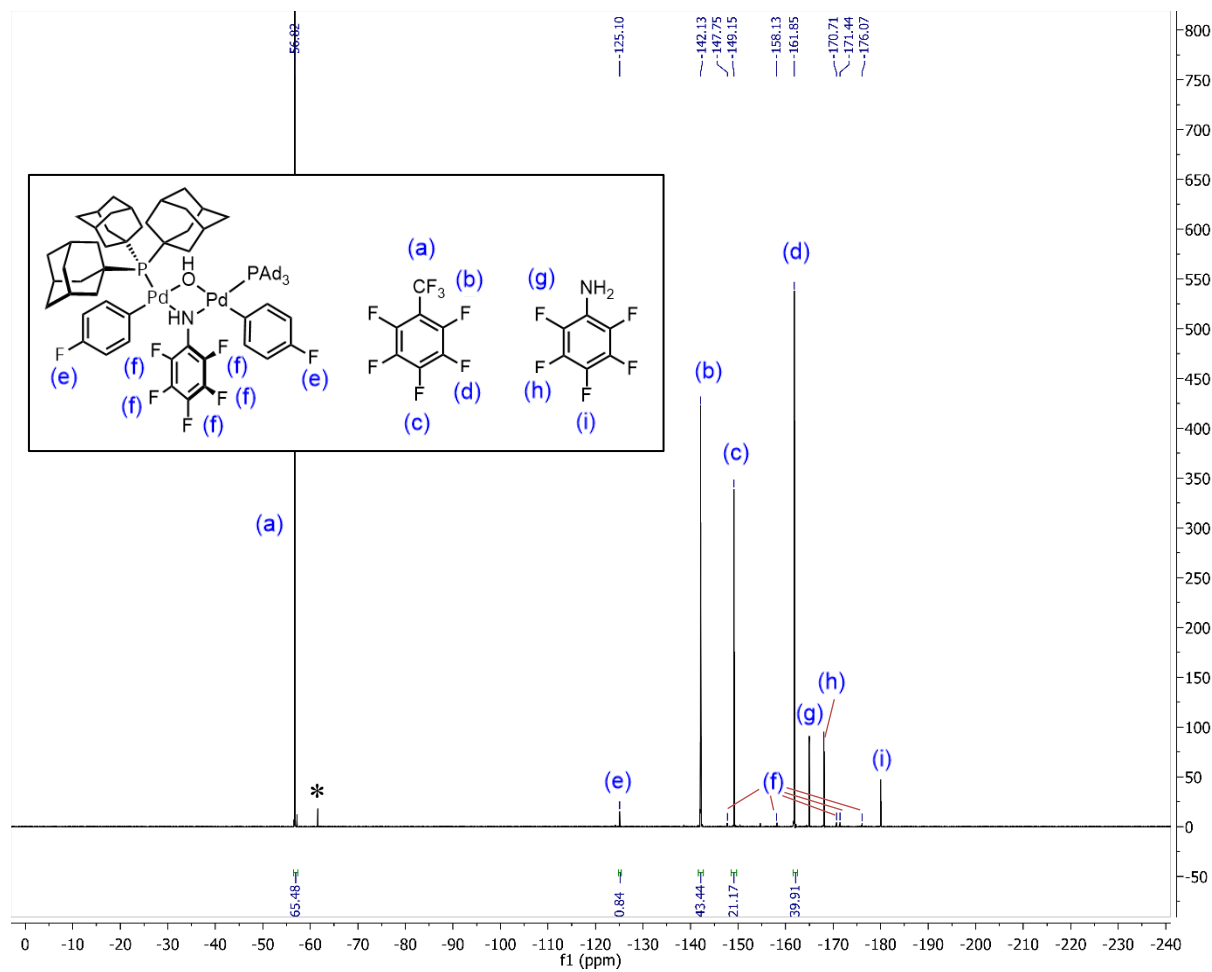

**Figure S18.**  $^{19}\text{F}$  NMR spectrum (470 MHz, THF) of **34** generated in presence of internal standard (\* = unidentified).

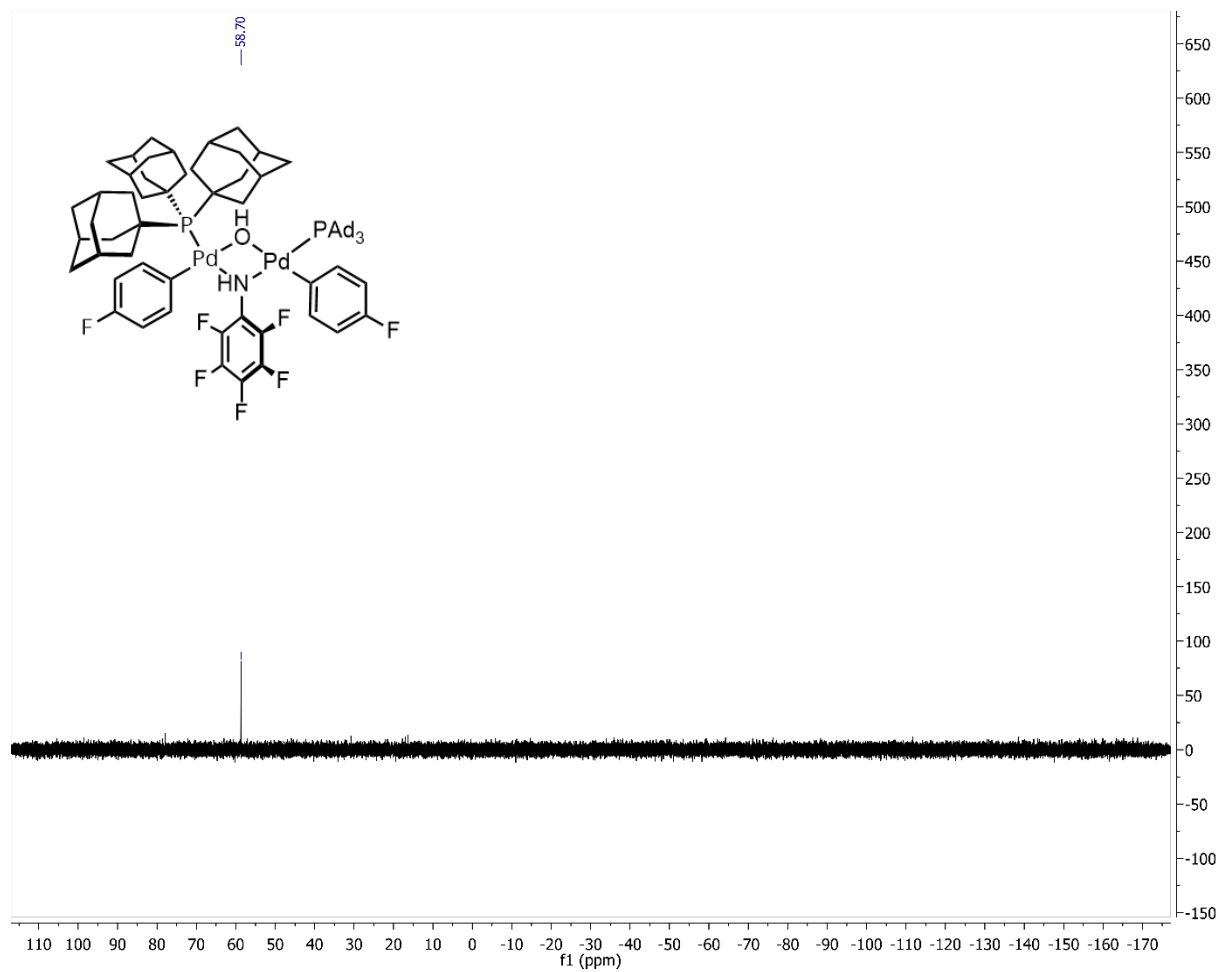

**Figure S19.**  $^{31}\text{P}\{^1\text{H}\}$  NMR spectrum (202 MHz, THF) of **34**.

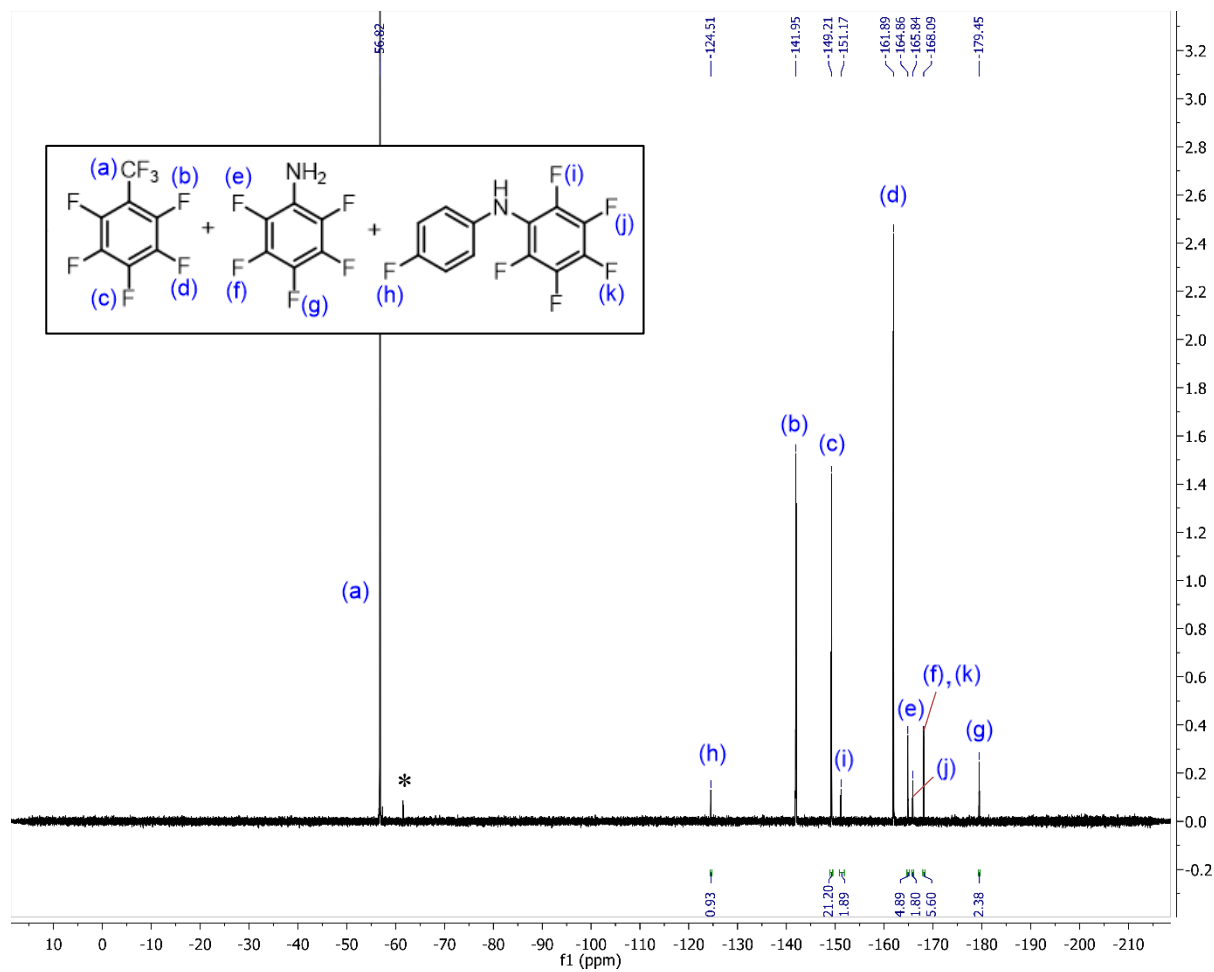

**Figure S20.**  $^{19}\text{F}$  NMR spectrum (470 MHz, THF) of **4** generated upon warming a solution of **34** (\* = unidentified).

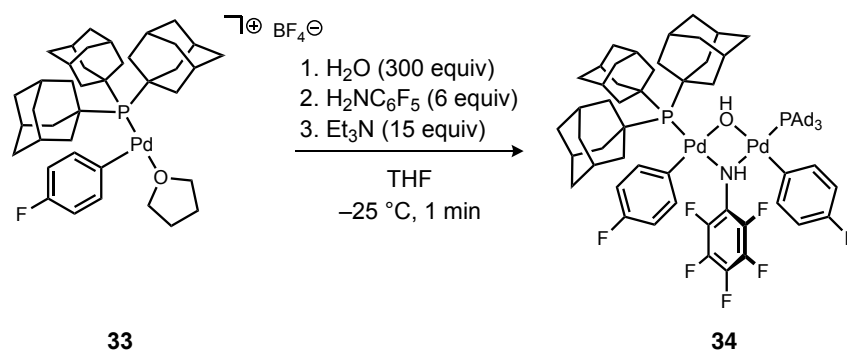

**Independent synthesis of 34 from 33 in the presence of H<sub>2</sub>O.** The generation of  $[\text{Pd(PAd}_3\text{)(4-FC}_6\text{H}_4\text{)]}^+\text{BF}_4^-$  (**33**) was adapted from a known procedure.<sup>3</sup>  $\text{Pd(PAd}_3\text{)(4-FC}_6\text{H}_4\text{)Br}$  (**1**) (9.0 mg, 12.5  $\mu\text{mol}$ ) was dissolved in THF (2.5 mL). Separately,  $\text{AgBF}_4$  (20 mg, 0.10 mmol) was dissolved in THF (2 mL). Both solutions were chilled at  $-35\text{ }^\circ\text{C}$  (MeOH/H<sub>2</sub>O dry ice bath). The latter solution ( $\text{AgBF}_4$ , 2.5  $\mu\text{mol}$ , 50  $\mu\text{L}$ ) was then added to the solution of **1** (2.5  $\mu\text{mol}$ , 0.5 mL) in a 4 mL vial at  $-35\text{ }^\circ\text{C}$ . The mixture (0.55 mL) was quickly shaken, left in the cooling bath for 10 min, and transferred into an NMR tube capped with a rubber septum. Next, degassed deionized water (14  $\mu\text{L}$ , 0.75 mmol, 300 equiv), pentafluoroaniline (0.1 mL from a 15 mM stock solution in THF, 15  $\mu\text{mol}$ , 6 equiv), and triethylamine (5  $\mu\text{L}$ , 38  $\mu\text{mol}$ , 15 equiv) were injected into the NMR tube sequentially at  $-78\text{ }^\circ\text{C}$ . The reaction mixture was shaken gently for 1 min, then a  $^{31}\text{P}\{^1\text{H}\}$  NMR spectrum was acquired at  $-25\text{ }^\circ\text{C}$ , which indicated clean formation of **34**.



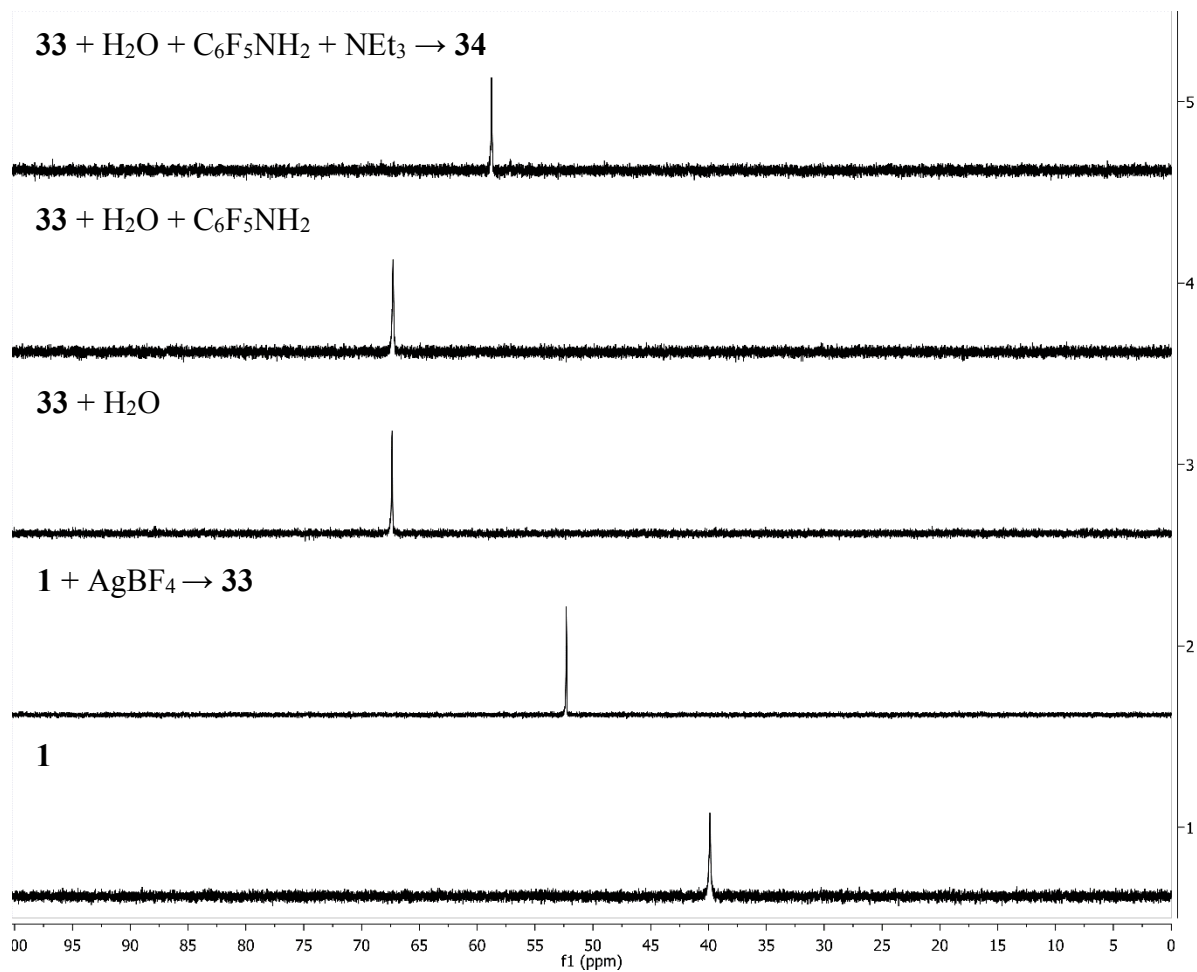

**Figure S21.** Stacked  $^{31}\text{P}\{^1\text{H}\}$  NMR spectra (202 MHz, THF) for generation of **34** from **1** (via **33**) by sequential addition of (top to bottom) AgBF<sub>4</sub>, water, pentafluoroaniline, then Et<sub>3</sub>N.

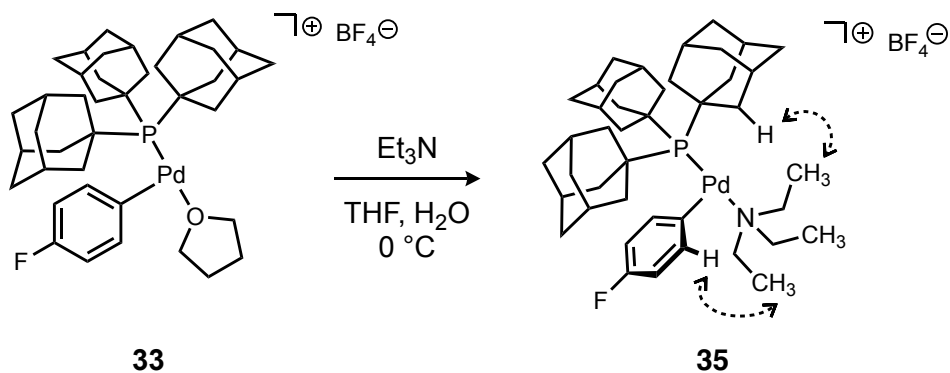

**Synthesis and characterization of  $[\text{Pd}(\text{PAD}_3)(4\text{-FC}_6\text{H}_4)(\text{NEt}_3)]^+ \text{BF}_4^-$  (**35**).** The generation of  $[\text{Pd}(\text{PAD}_3)(4\text{-FC}_6\text{H}_4)]^+ \text{BF}_4^-$  (**33**) was adapted from a known procedure.<sup>3</sup>  $\text{Pd}(\text{PAD}_3)(4\text{-FC}_6\text{H}_4)\text{Br}$  **1** (5.4 mg, 7.5  $\mu\text{mol}$ ) was dissolved in THF-*d*<sub>8</sub> (1.5 mL). Separately,  $\text{AgBF}_4$  (9.8 mg, 50  $\mu\text{mol}$ ) was dissolved in THF-*d*<sub>8</sub> (1 mL). Both solutions were chilled at -35 °C (MeOH/H<sub>2</sub>O dry ice bath). The latter solution ( $\text{AgBF}_4$ , 2.5  $\mu\text{mol}$ , 50  $\mu\text{L}$ ) was then added to the solution of **1** (2.5  $\mu\text{mol}$ , 0.5 mL) in a 4 mL vial at -35 °C. Octafluorotoluene (internal standard, 0.3  $\mu\text{L}$ , 1.9  $\mu\text{mol}$ ) was added to the solution. The mixture (0.55 mL) was quickly shaken, left in the cooling bath for 10 min, and transferred into an NMR tube capped with a rubber septum. <sup>1</sup>H, <sup>19</sup>F, and <sup>31</sup>P{<sup>1</sup>H} NMR spectra were acquired at -25 °C to confirm clean formation of **33** prior to proceeding to the next step. Next, triethylamine (5.0  $\mu\text{L}$ , 38  $\mu\text{mol}$ , 15 equiv) was injected and the reaction mixture was shaken gently for 1 min at -35 °C. <sup>1</sup>H, <sup>19</sup>F, and <sup>31</sup>P{<sup>1</sup>H} NMR spectra were acquired at -25 °C, which indicated formation of a new complex (**35**) in 74% yield along with an unidentified side product (19%). Analysis by EXSY NMR indicated exchange between free and Pd-bound  $\text{NEt}_3$  on the NMR time scale; signals corresponding to the 4-fluorophenyl group on **35** and the unidentified side product supports an equilibrium process involving the two compounds. NOE correlations (dashed lines) between the 4-fluorophenyl on Pd and coordinated  $\text{Et}_3\text{N}$ , and also between  $\text{PAD}_3$  resonances and coordinated  $\text{Et}_3\text{N}$ , support the structure assignment of **35** shown above.

**<sup>1</sup>H NMR** (500 MHz, THF-*d*<sub>8</sub>)  $\delta$  7.55 – 7.49 (m, 2H), 6.96 (t,  $J = 8.7$  Hz, 2H), 2.47 (6H, obscured by  $\text{NEt}_3$  peak), 2.43 (18H, obscured by  $\text{NEt}_3$  peak), 2.07 (br, 9H), 1.87 – 1.69 (m, 18H, obscured by THF peak), 1.51 (br, 9H).

**<sup>19</sup>F NMR** (470 MHz, THF-*d*<sub>8</sub>)  $\delta$  120.5, 153.8

**<sup>31</sup>P{<sup>1</sup>H} NMR** (202 MHz, THF-*d*<sub>8</sub>)  $\delta$  41.5.

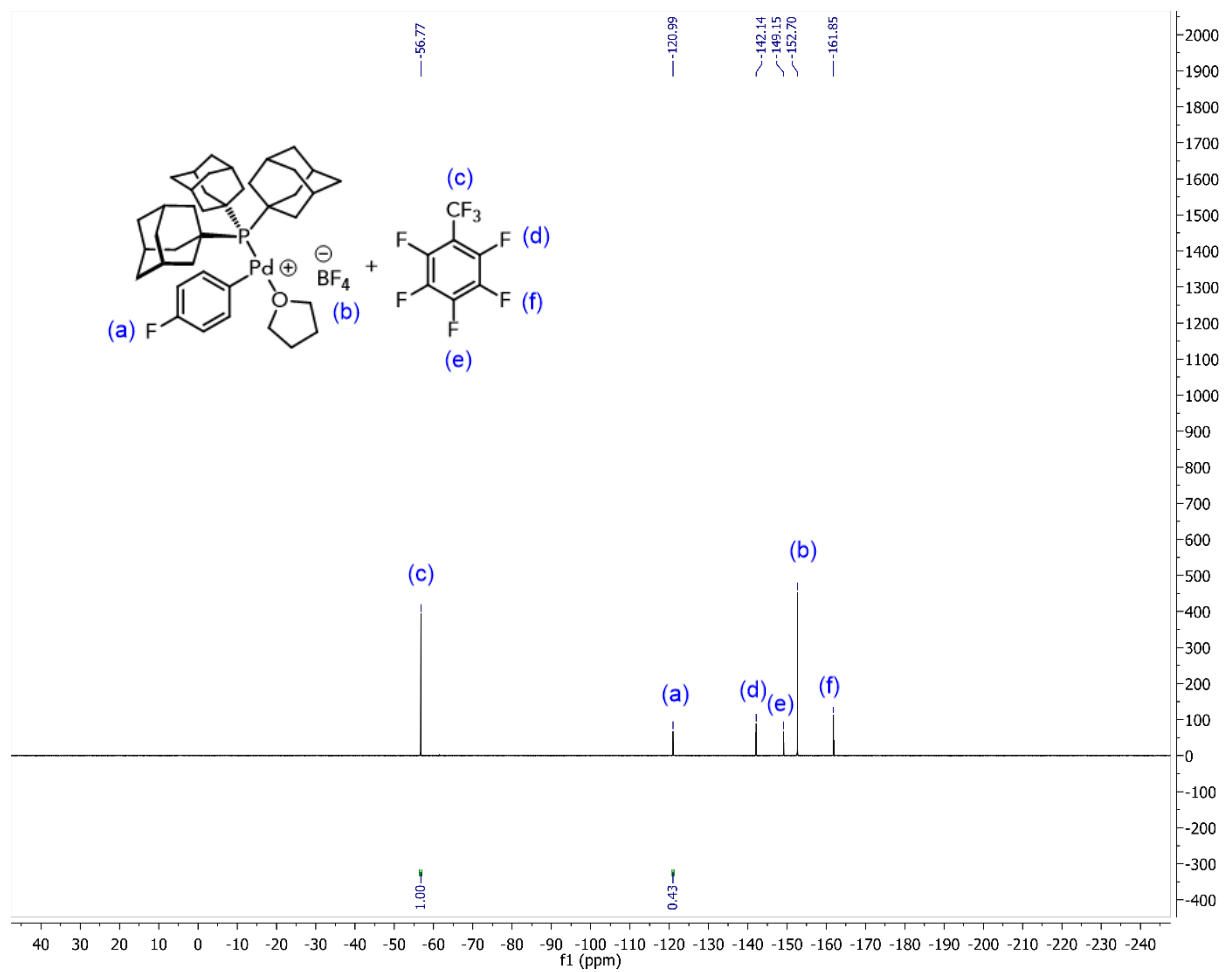

**Figure S22.**  $^{19}\text{F}$  NMR spectrum (470 MHz,  $\text{THF-}d_8$ ) of **33** generated prior to addition of  $\text{Et}_3\text{N}$  and formation of **35**.

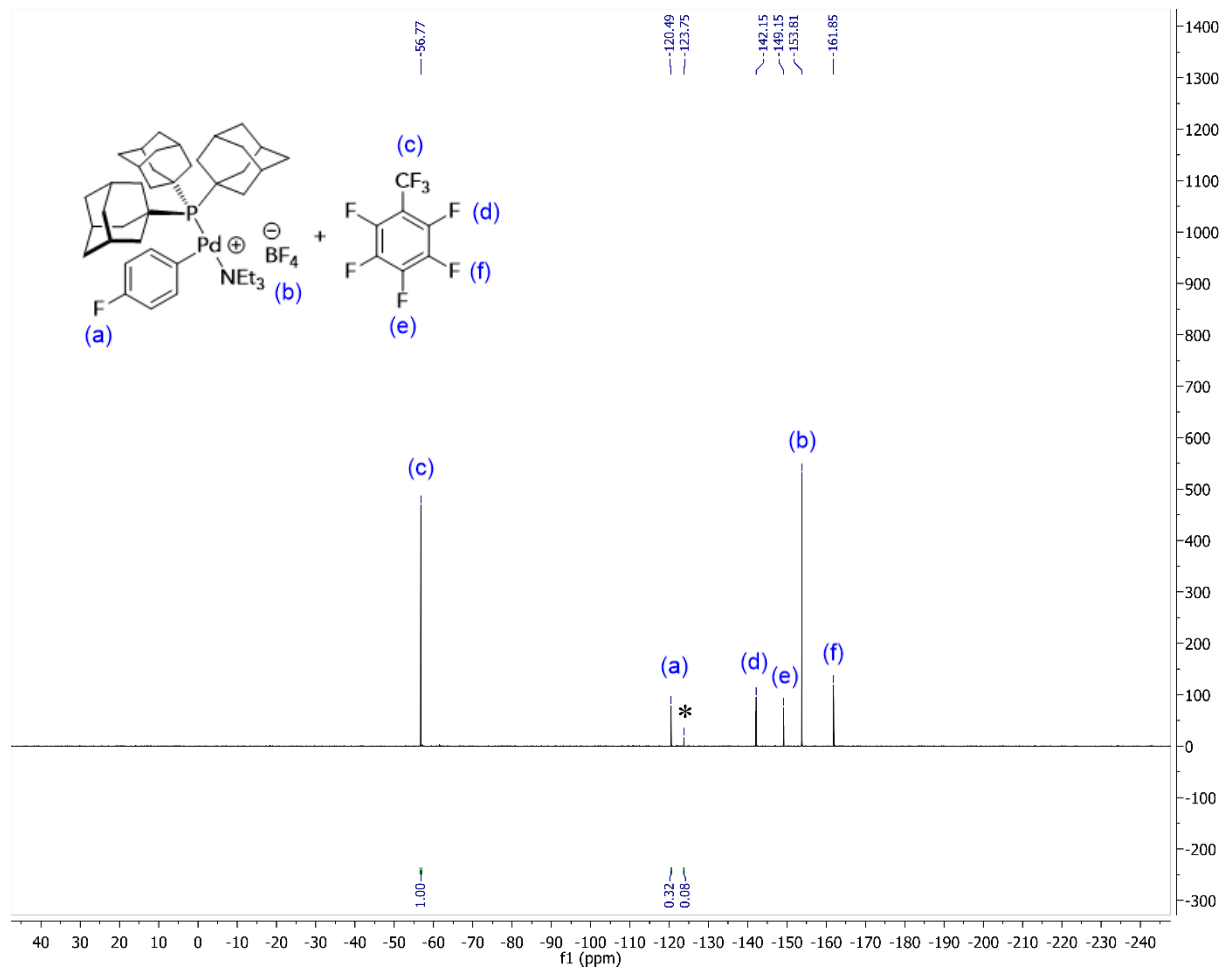

**Figure S23.**  $^{19}\text{F}$  NMR spectrum (470 MHz,  $\text{THF-}d_8$ ) of **35** (\* = unidentified).

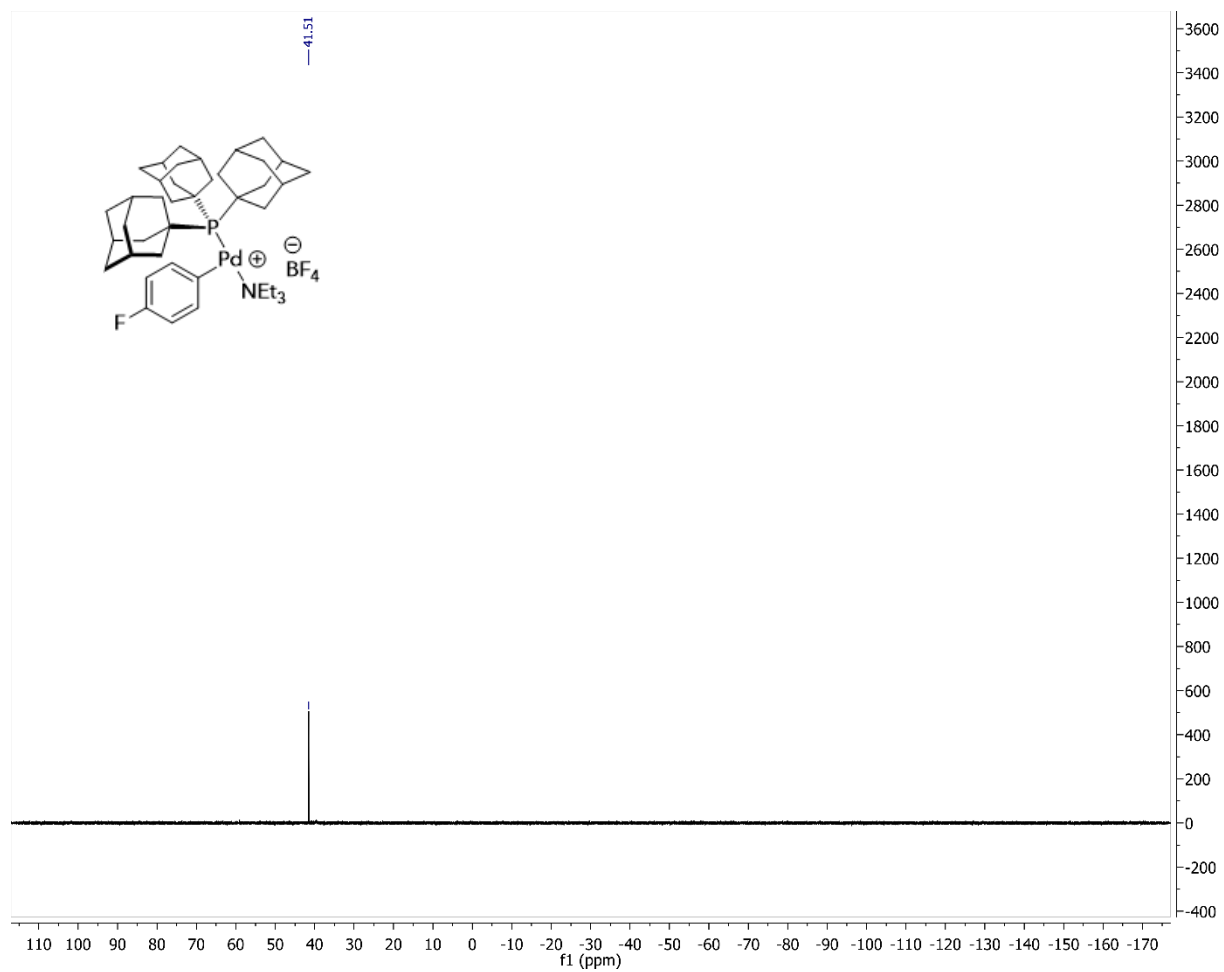

**Figure S24.**  $^{31}\text{P}\{^1\text{H}\}$  NMR spectrum (202 MHz,  $\text{THF-}d_8$ ) of **35**.

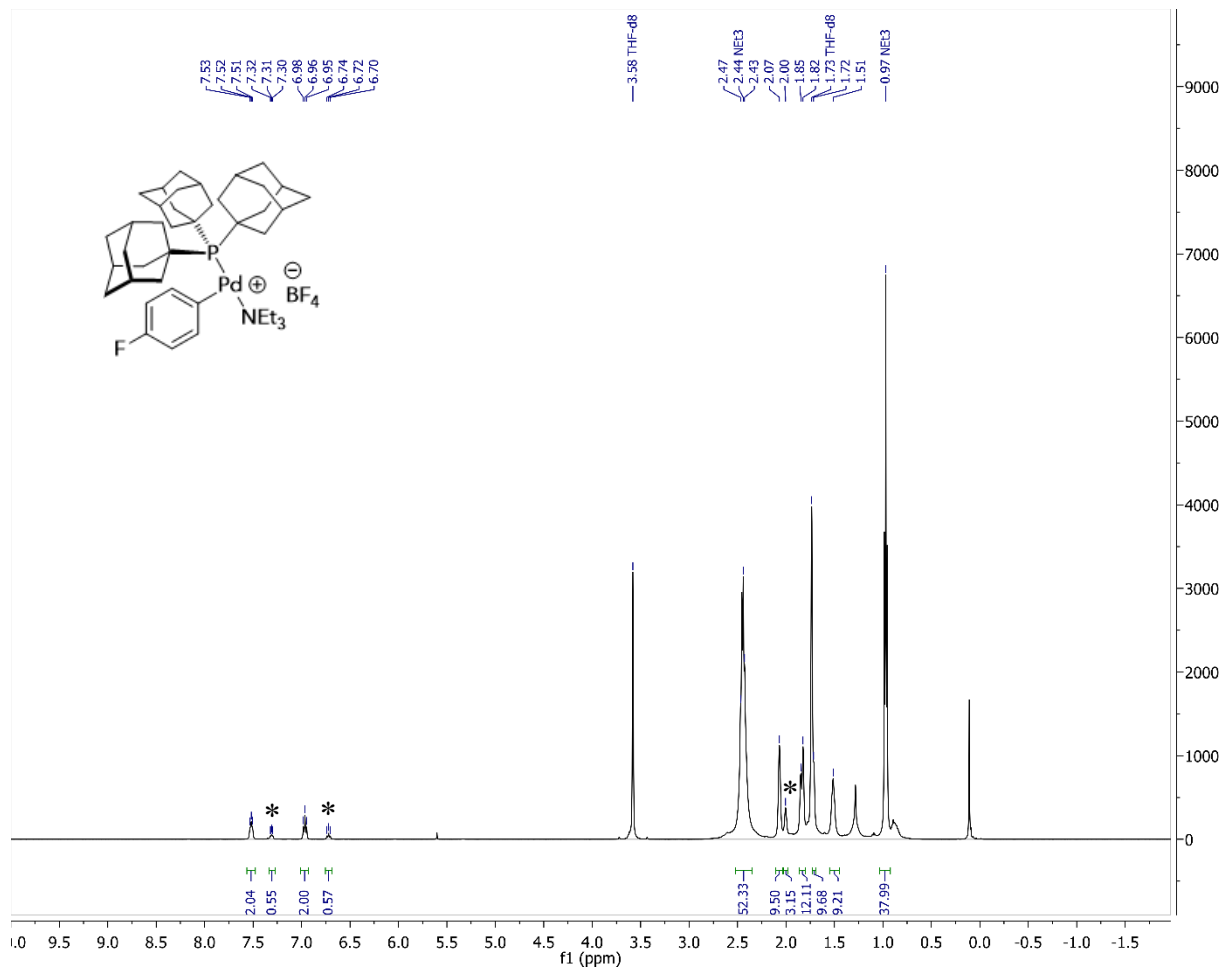

**Figure S25.**  $^1\text{H}$  NMR spectrum (500 MHz,  $\text{THF-}d_8$ ) of **35** (\* = unidentified).

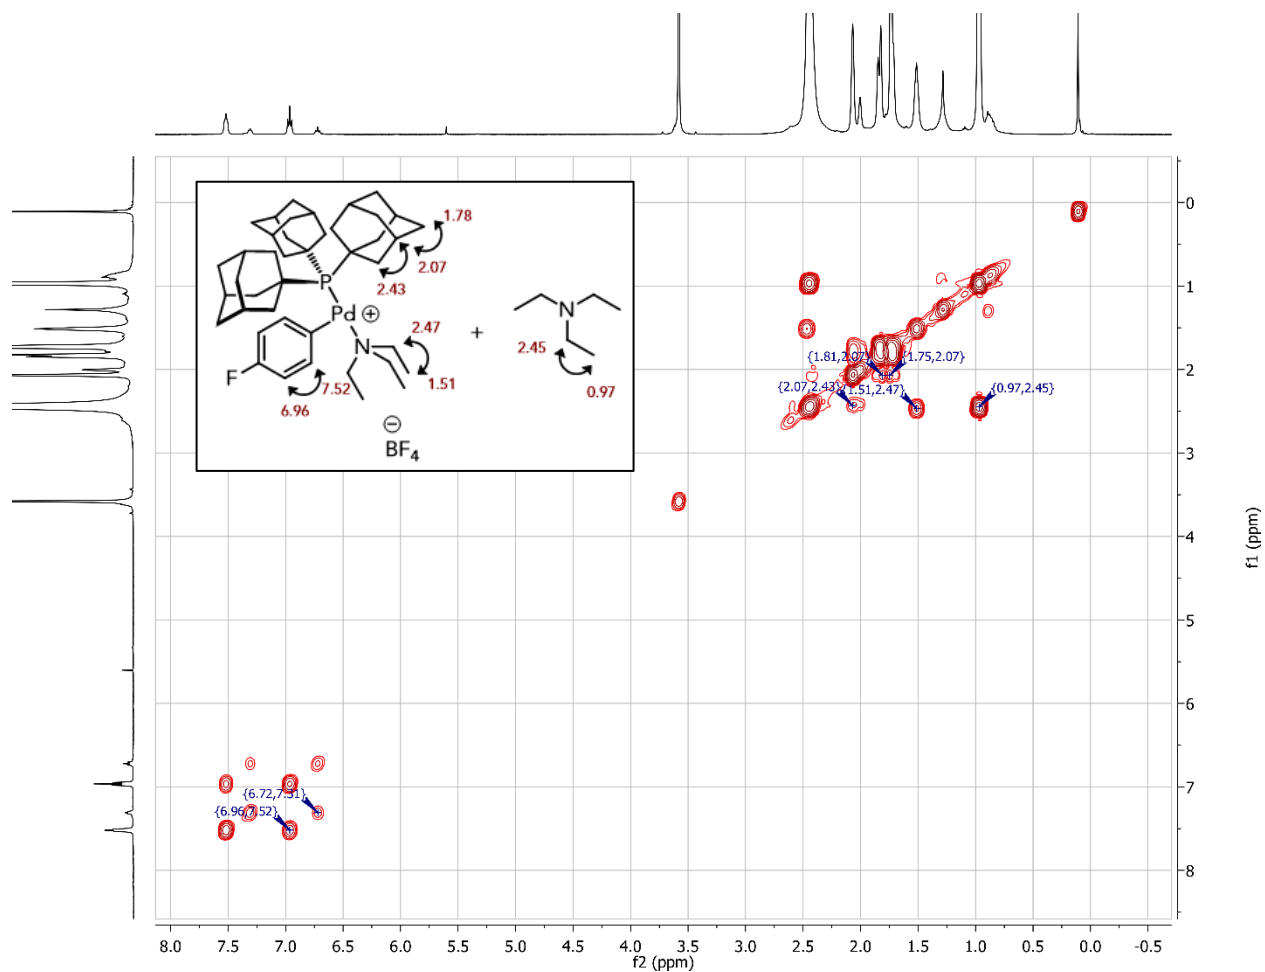

**Figure S26.**  $^1\text{H}$ - $^1\text{H}$  COSY NMR spectrum (500 MHz,  $\text{THF-}d_8$ ) of **35**.

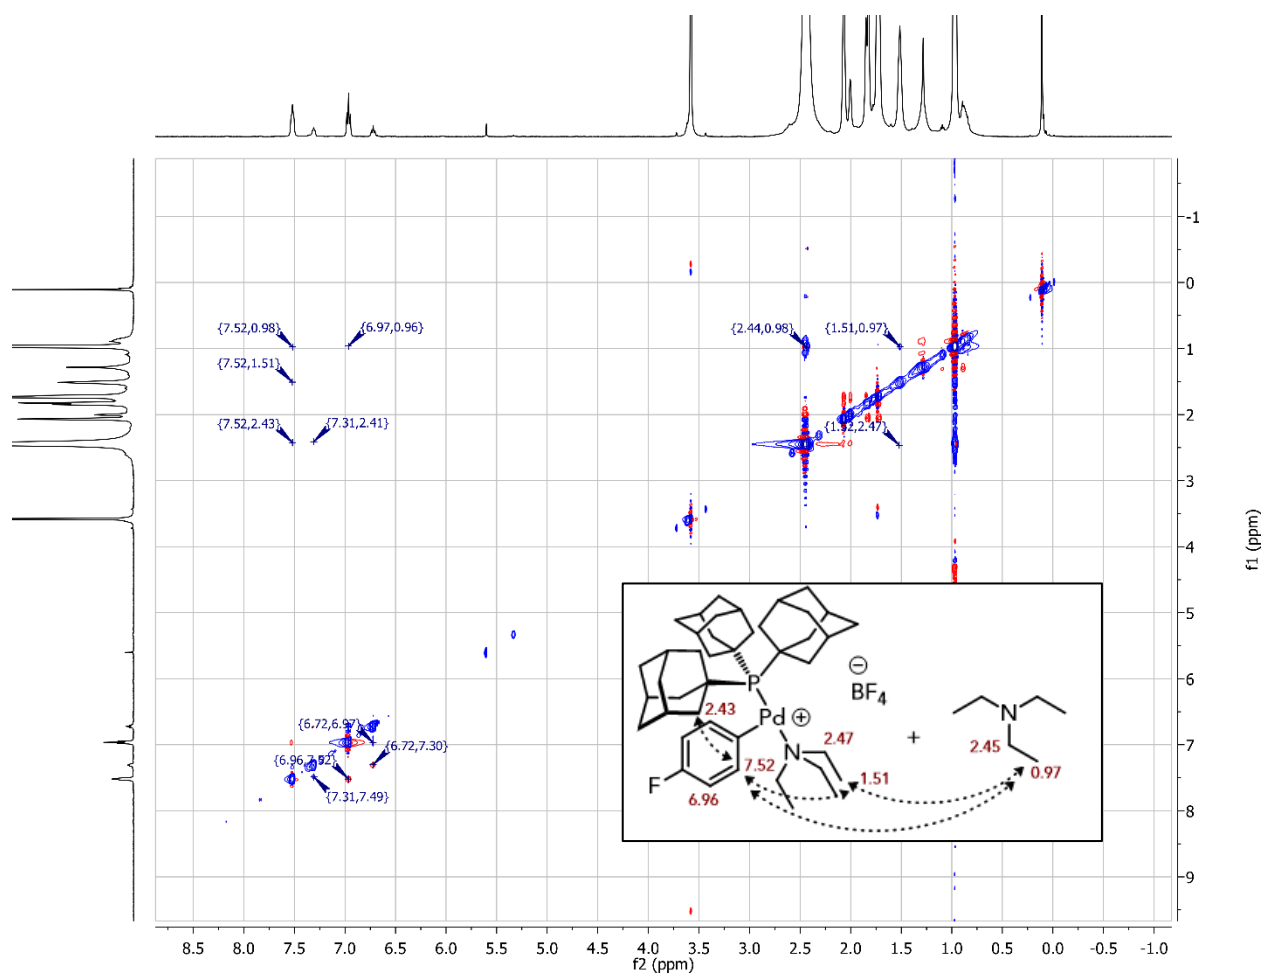

**Figure S27.**  $^1\text{H}$ - $^1\text{H}$  NOESY/EXSY NMR spectrum (500 MHz,  $\text{THF-}d_8$ ) of **35**.



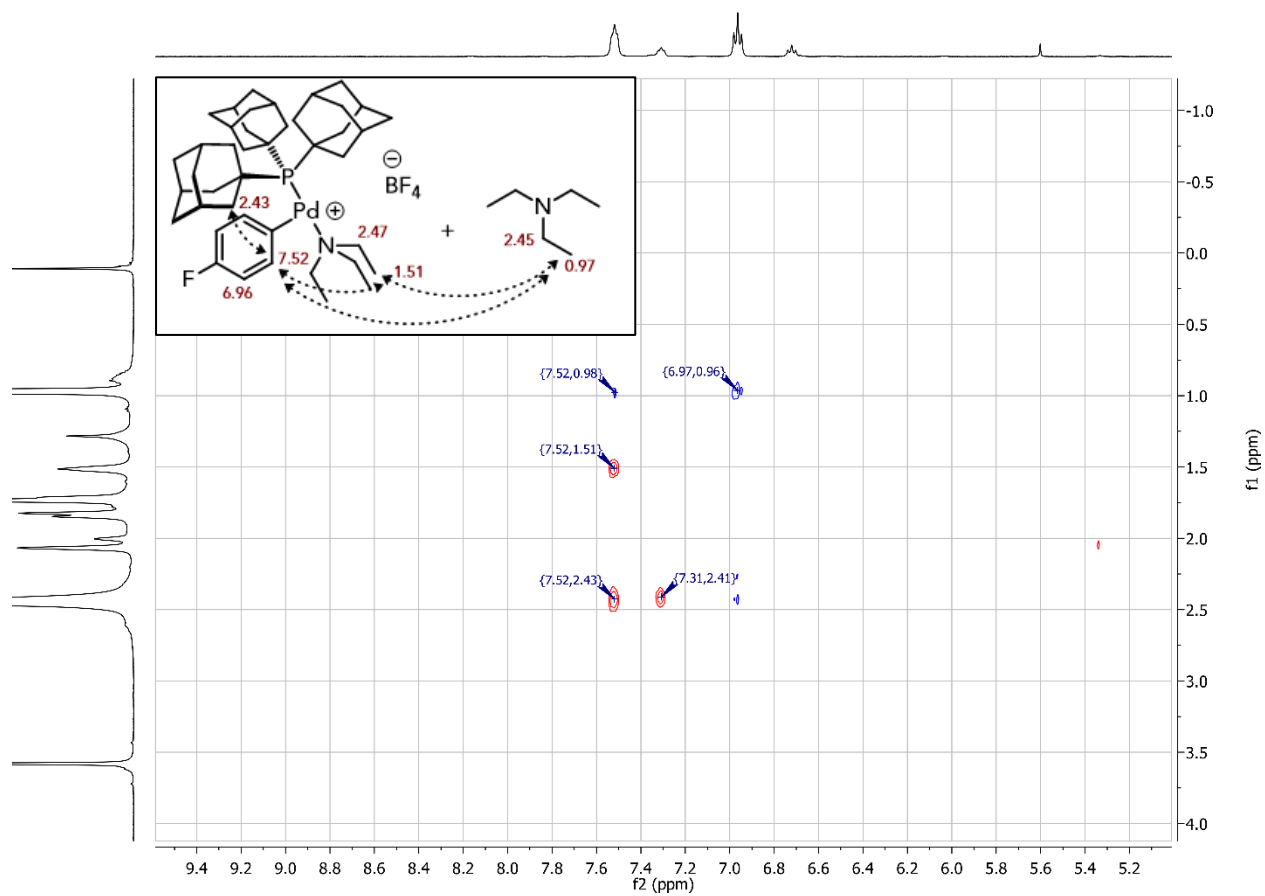

**Figure S28.** Inset of  $^1\text{H}$ - $^1\text{H}$  NOESY/EXSY NMR spectrum (500 MHz,  $\text{THF-}d_8$ ) of **35**.

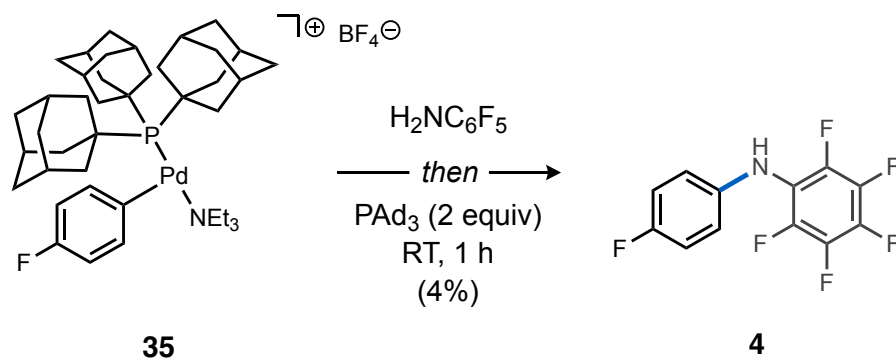

**Attempted conversion of 35 into 4 in the absence of water.** The generation of  $[\text{Pd}(\text{PAd}_3)(4\text{-FC}_6\text{H}_4)]^+ \text{BF}_4^-$  (**33**) was adapted from a known procedure.<sup>3</sup>  $\text{Pd}(\text{PAd}_3)(4\text{-FC}_6\text{H}_4)\text{Br}$  **1** (5.4 mg, 7.5  $\mu\text{mol}$ ) and trifluorotoluene (internal standard, 1  $\mu\text{L}$ , 8.2  $\mu\text{mol}$ ) were dissolved in  $\text{THF-}d_8$  (1.5 mL). Separately,  $\text{AgBF}_4$  (10 mg, 50  $\mu\text{mol}$ ) was dissolved in  $\text{THF-}d_8$  (1 mL). Both solutions were chilled at  $-35$   $^\circ\text{C}$  (MeOH/ $\text{H}_2\text{O}$  dry ice bath). The latter solution ( $\text{AgBF}_4$ , 2.5  $\mu\text{mol}$ , 50  $\mu\text{L}$ ) was then added to the solution of **1** (2.5  $\mu\text{mol}$ , 0.5 mL) in a 4 mL vial at  $-35$   $^\circ\text{C}$ . The mixture (0.55 mL) was quickly shaken, left in the cooling bath for 10 min, and transferred into an NMR tube capped with a rubber septum. Next, pentafluoroaniline (0.1 mL from a 15 mM stock solution in THF, 15  $\mu\text{mol}$ , 6 equiv), and triethylamine (5  $\mu\text{L}$ , 37.5  $\mu\text{mol}$ , 15 equiv) were injected into the NMR tube sequentially at  $-78$   $^\circ\text{C}$ . The reaction mixture was shaken gently for 1 min then a  $^{31}\text{P}\{^1\text{H}\}$  NMR spectrum was acquired at  $-25$   $^\circ\text{C}$  confirming formation of **35** (77%). Finally, a solution of  $\text{PAd}_3$  (2.2 mg, 5.0  $\mu\text{mol}$ , 2 equiv) in THF (0.1 mL) was injected into the NMR tube and the mixture was warmed to room temperature. After 1 h,  $^{19}\text{F}$  and  $^{31}\text{P}\{^1\text{H}\}$  NMR spectra were acquired that showed formation of only a trace of **4** (4%).

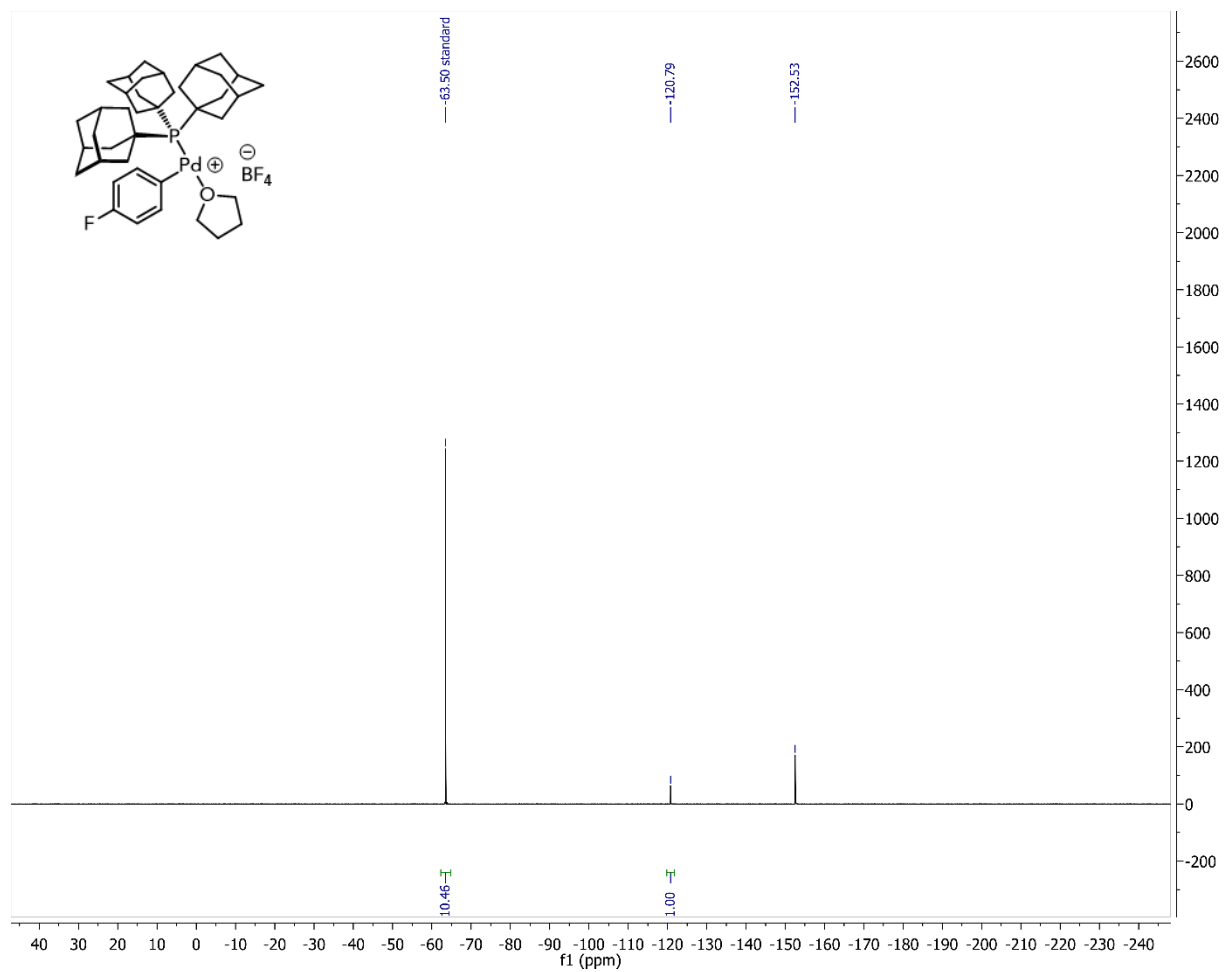

**Figure S29.**  $^{19}\text{F}$  NMR spectrum (470 MHz, THF) of **33** prior to addition of  $\text{Et}_3\text{N}$  and formation of **35**.

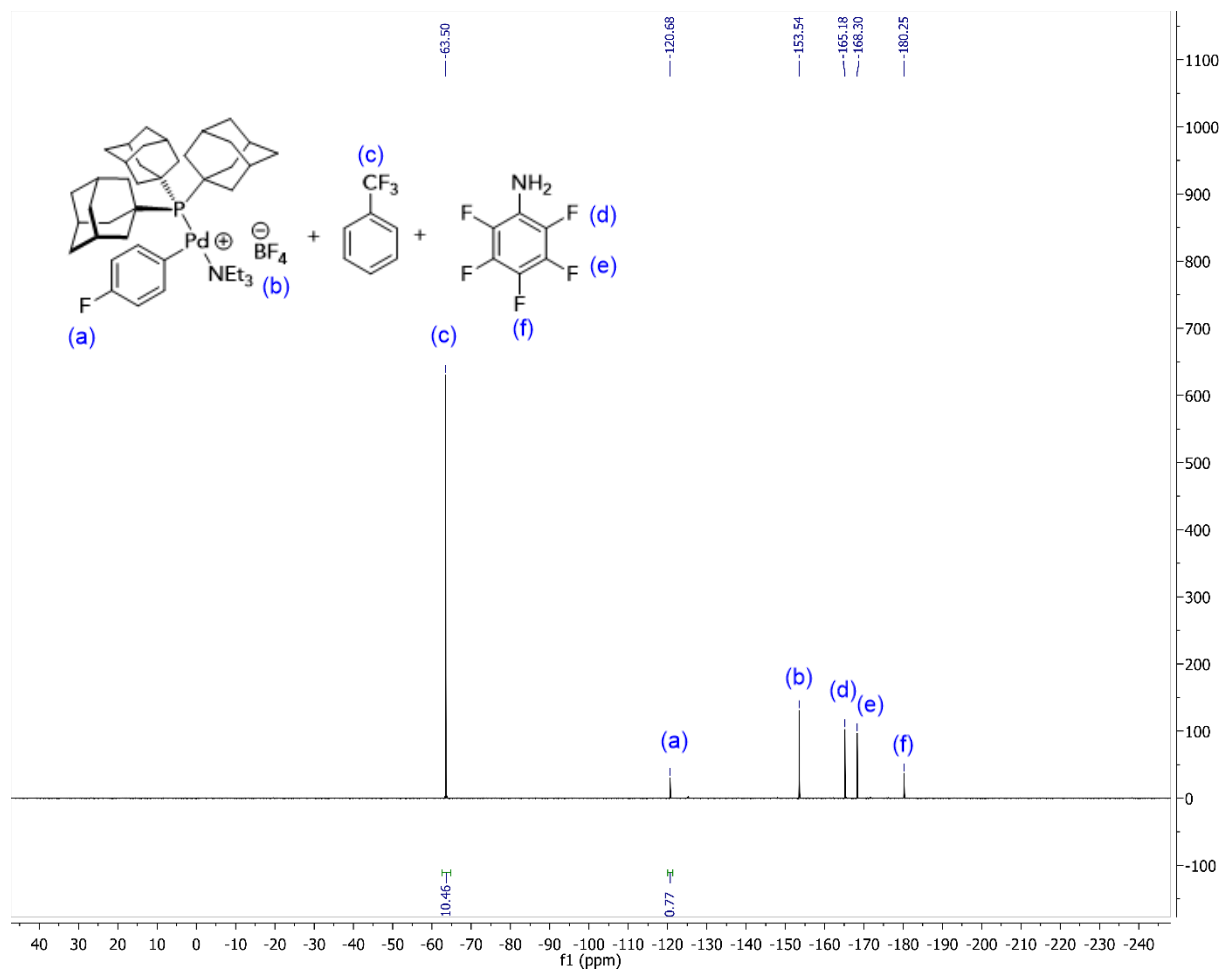

**Figure S30.**  $^{19}\text{F}$  NMR spectrum (470 MHz, THF) of **35** in the presence of pentafluoroaniline, indicating the preference for coordination of  $\text{Et}_3\text{N}$  to Pd.

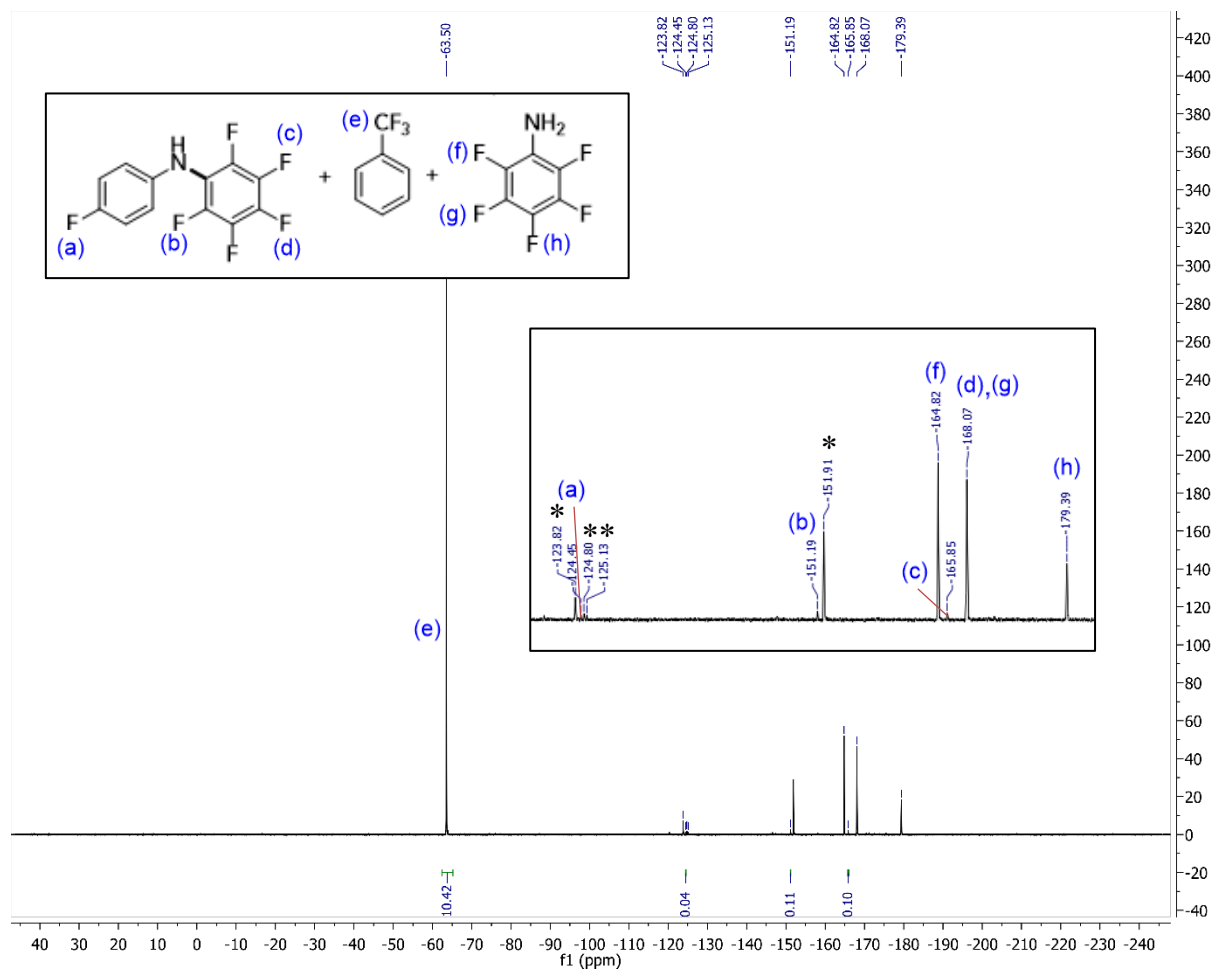

**Figure S31.** <sup>19</sup>F NMR spectrum (470 MHz, THF) of **35** after warming to RT for 1 h (\* = unidentified).

**Rapid conversion of 35 into 32 in the presence of water.** The sequential conversion of **1** (7.5  $\mu\text{mol}$  scale) to **33** then to **35** was repeated according to the procedure described above. Water (1  $\mu\text{L}$ , 75  $\mu\text{mol}$ , 10 equiv) was injected into the solution of **35** and the resulting mixture was shaken gently for 1 min at 0  $^{\circ}\text{C}$ . A  $^{31}\text{P}\{^1\text{H}\}$  spectrum (Figure S31) was then acquired at -25  $^{\circ}\text{C}$ , which showed consumption of **35** and formation of **32** as the only new species.

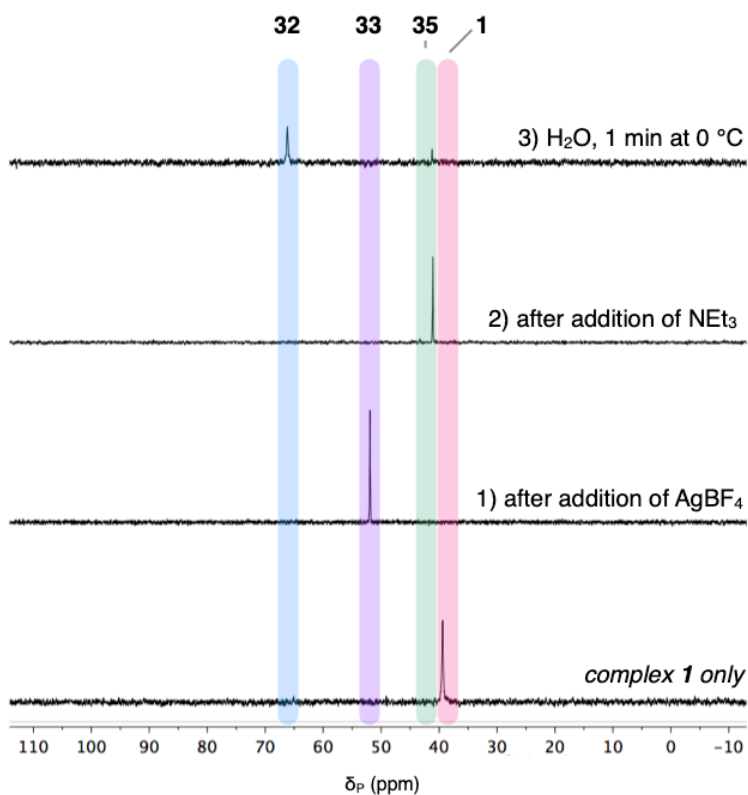

**Figure S32.**  $^{19}\text{F}$  NMR spectrum (470 MHz, THF) of **35** after warming to RT for 1 h (\* = unidentified).

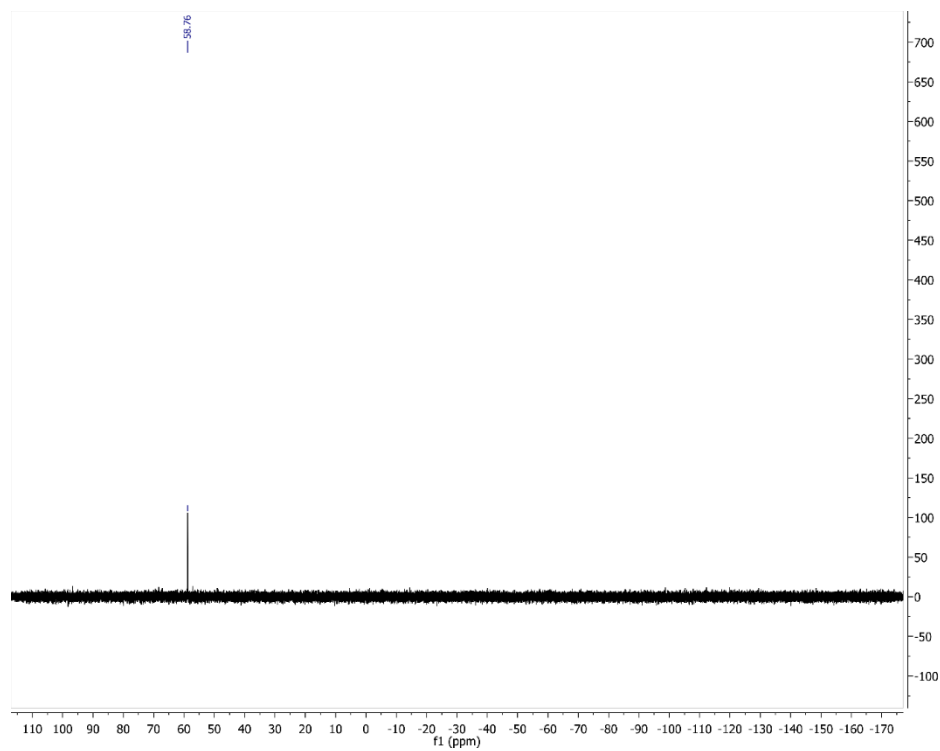

**Figure S33.** Untruncated  $^{31}\text{P}$  NMR spectrum of inset in Figure 7, top.

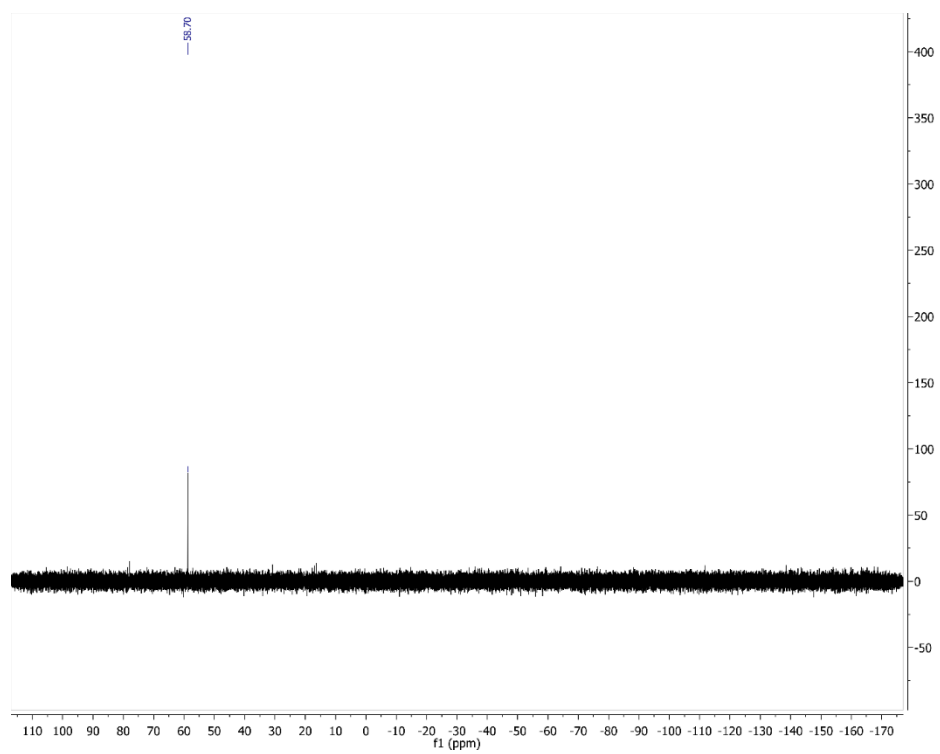

**Figure S34.** Untruncated  $^{31}\text{P}$  NMR spectrum of inset in Figure 7, second from top.

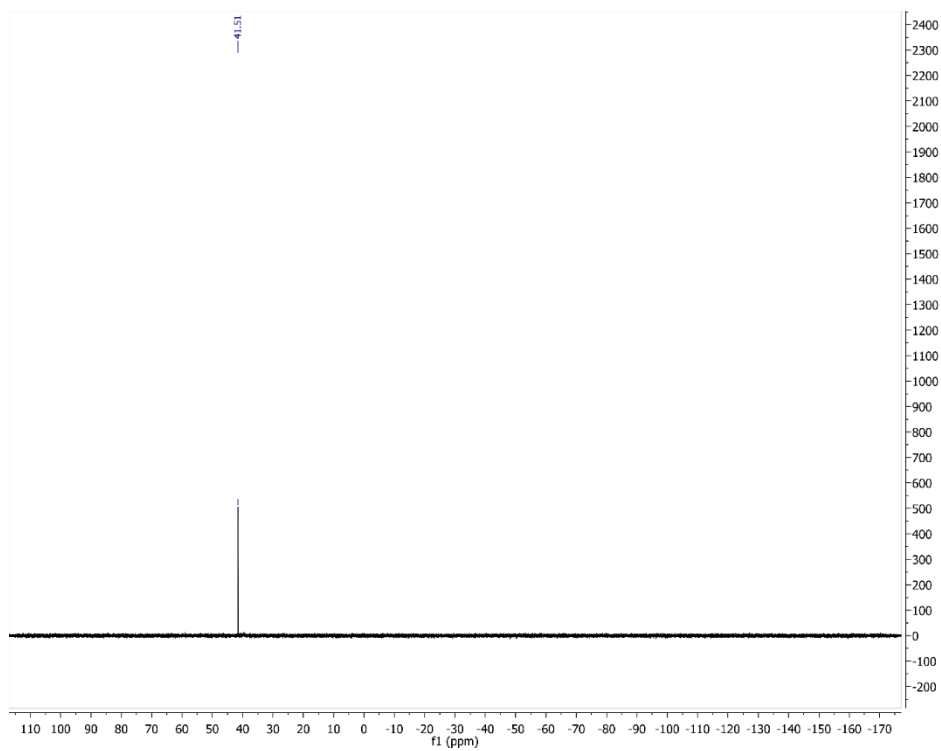

**Figure S35.** Untruncated  $^{31}\text{P}$  NMR spectrum of inset in Figure 7, second from bottom.

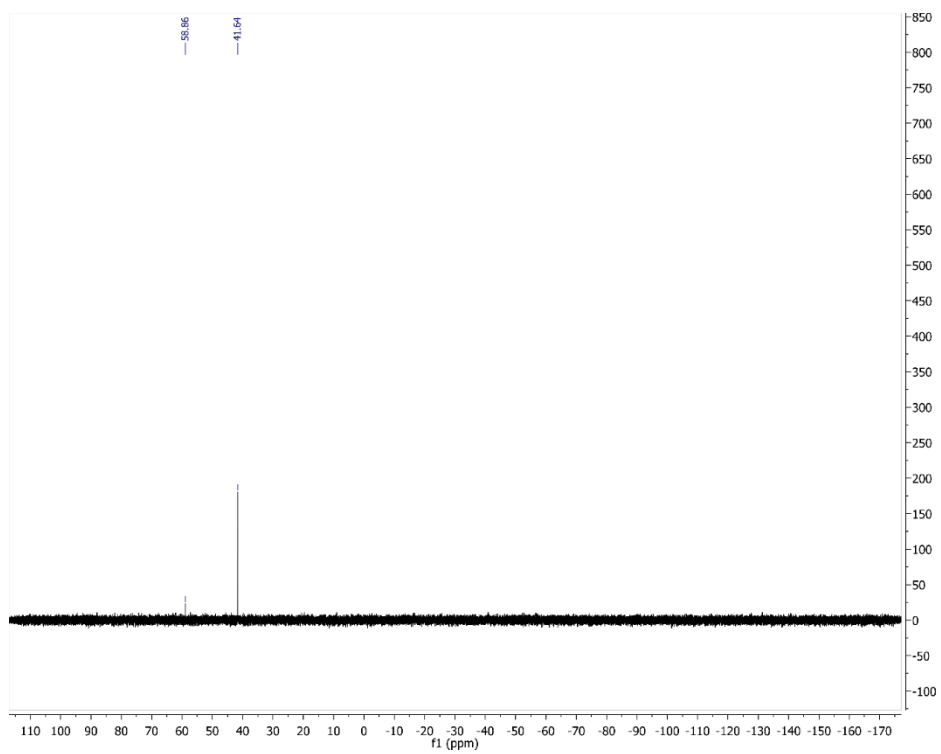

**Figure S36.** Untruncated  $^{31}\text{P}$  NMR spectrum of inset in Figure 7, bottom.



### Kinetic studies:

**General procedure for determination of the rate dependence on [4-FC<sub>6</sub>F<sub>4</sub>Br].** The method of variable time normalization analysis (VTNA) was used to interpret kinetic data.<sup>7</sup> To an oven-dried 4 mL scintillation vial equipped with a stir bar was charged with 1-bromo-4-fluorobenzene (0.125 or 0.25 mmol), aniline (34  $\mu$ L, 0.38 mmol), triethylamine (70  $\mu$ L, 0.5 mmol), trifluorotoluene (internal standard, 10  $\mu$ L, 83  $\mu$ mol), **1** (1.8 mg, 2.5  $\mu$ mol) and toluene (0.5 mL). The vial was capped with a puncturable PTFE-lined cap and was taken out of the glovebox. Under N<sub>2</sub> atmosphere, degassed deionized water (3 mL) was injected into the vial and the reaction mixture was left stirring vigorously at 80 °C for 160 minutes. Aliquots (20  $\mu$ L) were taken at 5, 10, 20, 40, 80, and 160 min and were quenched by dilution in CDCl<sub>3</sub> (0.6 mL) at RT in an NMR tube. The yields were determined by <sup>19</sup>F NMR using a quantitative, single-scan experiment (acquisition time of 1.46 s and recycle delay time (d1) of 10 s). Both [3] vs.  $\Sigma([4\text{-F-C}_6\text{F}_4\text{Br}]^{0*}\Delta t)$  and [3] vs.  $\Sigma([4\text{-F-C}_6\text{F}_4\text{Br}]^{1*}\Delta t)$  were plotted where time (t) is in units of min, and the best overlay of data points was found for the zeroth-order plot with respect to the dependence of the rate on [4-F-C<sub>6</sub>F<sub>4</sub>Br]<sup>n</sup>. Note that for the reaction using 0.25 mmol 4-F-C<sub>6</sub>F<sub>4</sub>Br, data were not plotted beyond 20 min because yield of **3** at this time was 94%.

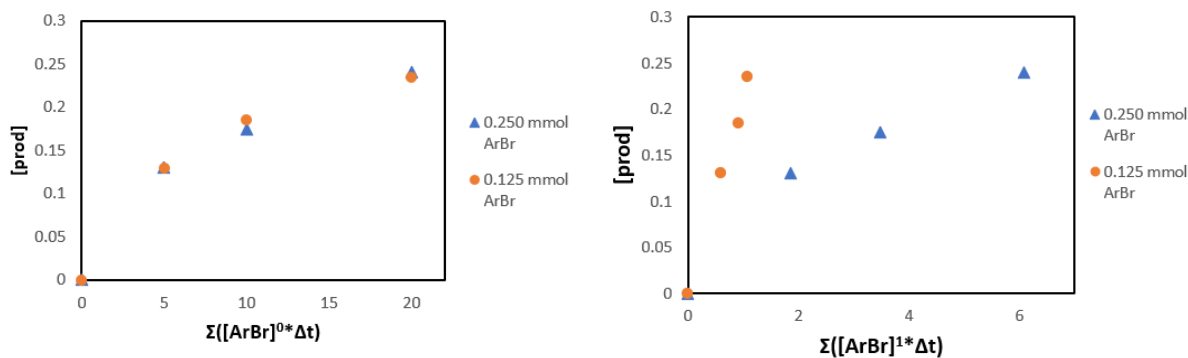

**Figure S37.** Variable time normalization analysis (VTNA) of reactions conducted at varying [4-F-C<sub>6</sub>F<sub>4</sub>Br].

**General procedure for determination of the rate dependence on [PhNH<sub>2</sub>].** The method of variable time normalization analysis (VTNA) was used to interpret kinetic data.<sup>7</sup> To an oven-dried 4 mL scintillation vial equipped with a stir bar was charged with 1-bromo-4-fluorobenzene (27  $\mu$ L, 0.25 mmol, 1.0 equiv), aniline (0.38 mmol or 0.75 mmol), triethylamine (70  $\mu$ L, 0.5 mmol), trifluorotoluene (internal standard, 10  $\mu$ L, 83  $\mu$ mol), **1** (1.8 mg, 2.5  $\mu$ mol) and toluene (0.5 mL). The vial was capped with a puncturable PTFE-lined cap and was taken out of the glovebox. Under N<sub>2</sub> atmosphere, degassed deionized water (3 mL) was injected into the vial and the reaction mixture was left stirring vigorously at 80 °C for 160 minutes. Aliquots (20  $\mu$ L) were taken at 5, 10, 20, 40, 80, and 160 minutes and were quenched by dilution into CDCl<sub>3</sub> (0.6 mL) at RT in an NMR tube. The yields were determined by <sup>19</sup>F NMR using a quantitative, single-scan experiment (acquisition time of 1.46 s and recycle delay time (d1) of 10 s). Both [3] vs.  $\Sigma([\text{PhNH}_2]^{0*}\Delta t)$  and [3] vs.  $\Sigma([\text{PhNH}_2]^{1*}\Delta t)$  were plotted where time (t) is in units of min, and the better overlay of data points was found for the zeroth-order plot with respect to the dependence of the rate on [PhNH<sub>2</sub>]<sup>n</sup>.

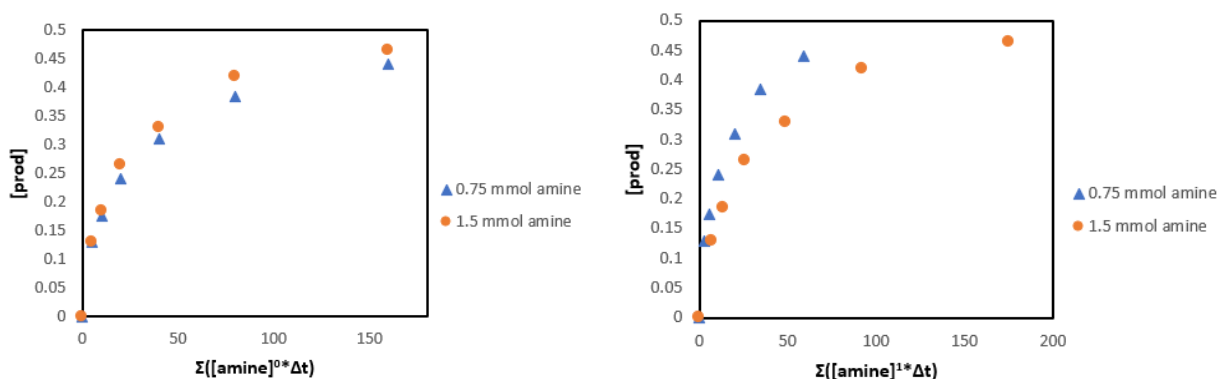

**Figure S38.** Variable time normalization analysis (VTNA) of reactions conducted at varying [PhNH<sub>2</sub>].

**General procedure for determination of the rate dependence on [Et<sub>3</sub>N].** The method of variable time normalization analysis (VTNA) was used to interpret kinetic data.<sup>7</sup> To an oven-dried 4 mL scintillation vial equipped with a stir bar was charged with 1-bromo-4-fluorobenzene (27  $\mu$ L, 0.25 mmol, 1.0 equiv), aniline (34  $\mu$ L, 0.38 mmol), triethylamine (0.5 mmol or 1.0 mmol), trifluorotoluene (internal standard, 10  $\mu$ L, 83  $\mu$ mol), **1** (1.8 mg, 2.5  $\mu$ mol) and toluene (0.5 mL). The vial was capped with a puncturable PTFE-lined cap and was taken out of the glovebox. Under N<sub>2</sub> atmosphere, degassed deionized water (3 mL) was injected into the vial and the reaction mixture was left stirring vigorously at 80 °C for 160 minutes. Aliquots (20  $\mu$ L) were taken at 5, 10, 20, 40, 80, and 160 minutes and were quenched by dilution into CDCl<sub>3</sub> (0.6 mL) at RT in an NMR tube. The yields were determined by <sup>19</sup>F NMR using a quantitative, single-scan experiment (acquisition time of 1.46 s and recycle delay time (d1) of 10 s). Both [3] vs.  $\Sigma([\text{NEt}_3]^0 \cdot \Delta t)$  and [3] vs.  $\Sigma([\text{NEt}_3]^1 \cdot \Delta t)$  were plotted where time (t) is in units of min, and the better overlay of data points was found for the zeroth-order plot with respect to the dependence of the rate on [Et<sub>3</sub>N]<sup>n</sup>.

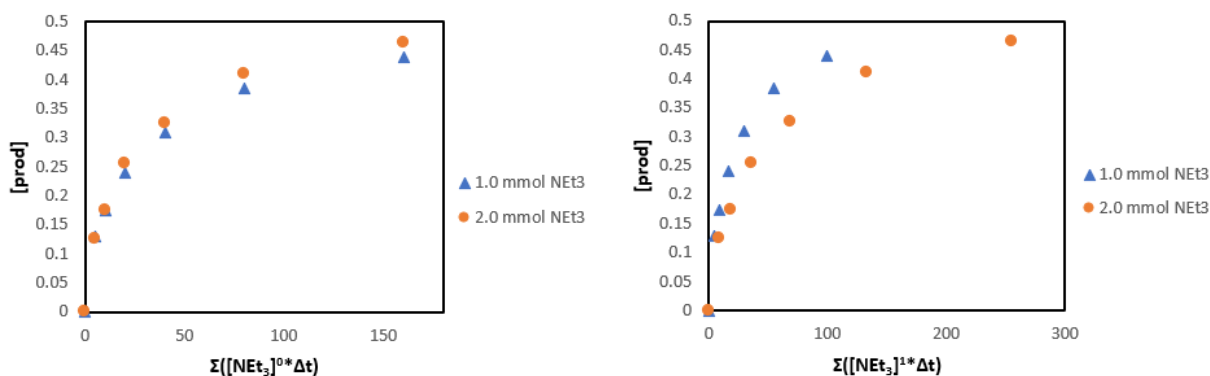

**Figure S39.** Variable time normalization analysis (VTNA) of reactions conducted at varying [Et<sub>3</sub>N].

**General procedure for determination of the rate dependence on [1] by initial rates.** The method of initial rates was used. To an oven-dried 4 mL scintillation vial equipped with a stir bar was charged with 1-bromo-4-fluorobenzene (27  $\mu\text{L}$ , 0.25 mmol), aniline (34  $\mu\text{L}$ , 0.375 mmol), triethylamine (70  $\mu\text{L}$ , 0.5 mmol), trifluorotoluene (internal standard, 10  $\mu\text{L}$ , 83  $\mu\text{mol}$ ), **1** (2.5  $\mu\text{mol}$  or 5.0  $\mu\text{mol}$ ) and toluene (0.5 mL). The vial was capped with a puncturable PTFE-lined cap and was taken out of the glovebox. Under  $\text{N}_2$  atmosphere, degassed deionized water (3 mL) was injected into the vial and the reaction mixture was left stirring vigorously at 80  $^\circ\text{C}$ . Aliquots (20  $\mu\text{L}$ ) were taken at 2, 4, 6, 8, and 10 minutes and were quenched by dilution into  $\text{CDCl}_3$  (0.6 mL) at RT in an NMR tube. The yields at each time were determined by  $^{19}\text{F}$  NMR using a quantitative, single-scan experiment (acquisition time of 1.46 s and recycle delay time (d1) of 10 s). Data were fit by linear regression analysis of plots of [3] vs. time at conversions of  $\leq 30\%$  yield. The dependence of the initial rate on [1] was calculated according to the following equations:

$$\left(\frac{[\text{Pd}]_2}{[\text{Pd}]_1}\right)^x = \left(\frac{\text{slope } 2}{\text{slope } 1}\right)$$

$$(2)^x = \left(\frac{0.028}{0.015}\right)$$

$$x = 0.90$$

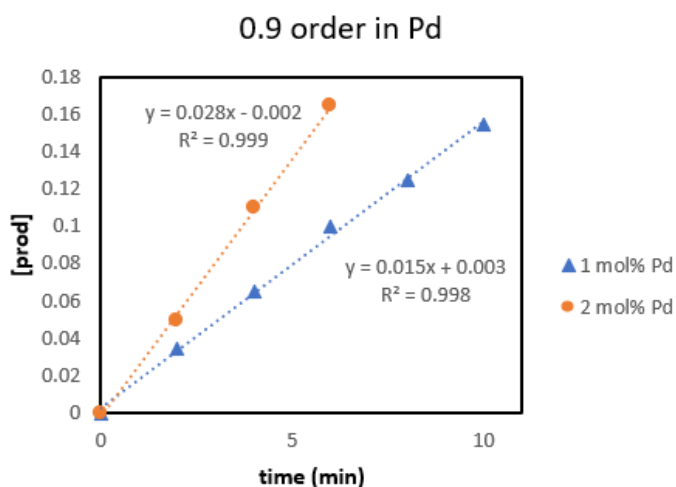

**Figure S40.** Initial rates during reactions conducted with either 2.5  $\mu\text{mol}$  or 5.0  $\mu\text{mol}$  of catalyst **1**.

**General procedure for determination of the rate dependence on [Pd] by VTNA.** The method of variable time normalization analysis (VTNA) was used to interpret kinetic data. To an oven-dried 4 mL scintillation vial equipped with a stir bar was charged with 1-bromo-4-fluorobenzene (27  $\mu\text{L}$ , 0.25 mmol, 1.0 equiv), aniline (34  $\mu\text{L}$ , 0.38 mmol), triethylamine (70  $\mu\text{L}$ , 0.5 mmol), trifluorotoluene (internal standard, 10  $\mu\text{L}$ , 83  $\mu\text{mol}$ ), **1** (2.5  $\mu\text{mol}$  or 7.5  $\mu\text{mol}$ ) and toluene (0.5 mL). The vial was capped with a puncturable PTFE-lined cap and was taken out of the glovebox. Under  $\text{N}_2$  atmosphere, degassed deionized water (3 mL) was injected into the vial and the reaction mixture was left stirring vigorously at 80  $^\circ\text{C}$  for 160 minutes. Aliquots (20  $\mu\text{L}$ ) were taken at 5, 10, 20, 40, 80, and 160 minutes and were quenched by dilution into  $\text{CDCl}_3$  (0.6 mL) at RT in an NMR tube. The yields were determined by  $^{19}\text{F}$  NMR using a quantitative, single-scan experiment (acquisition time of 1.46 s and recycle delay time (d1) of 10 s). Both **[3]** vs.  $[\text{Pd}]_0^{0.9} \cdot t$  and **[3]** vs.  $[\text{Pd}]_0^{0.5} \cdot t$  were plotted where time (t) is in units of min, and the better overlay of data points was found for the 0.9 order plot with respect to the dependence of the rate on  $[\text{Pd}]^n$ .

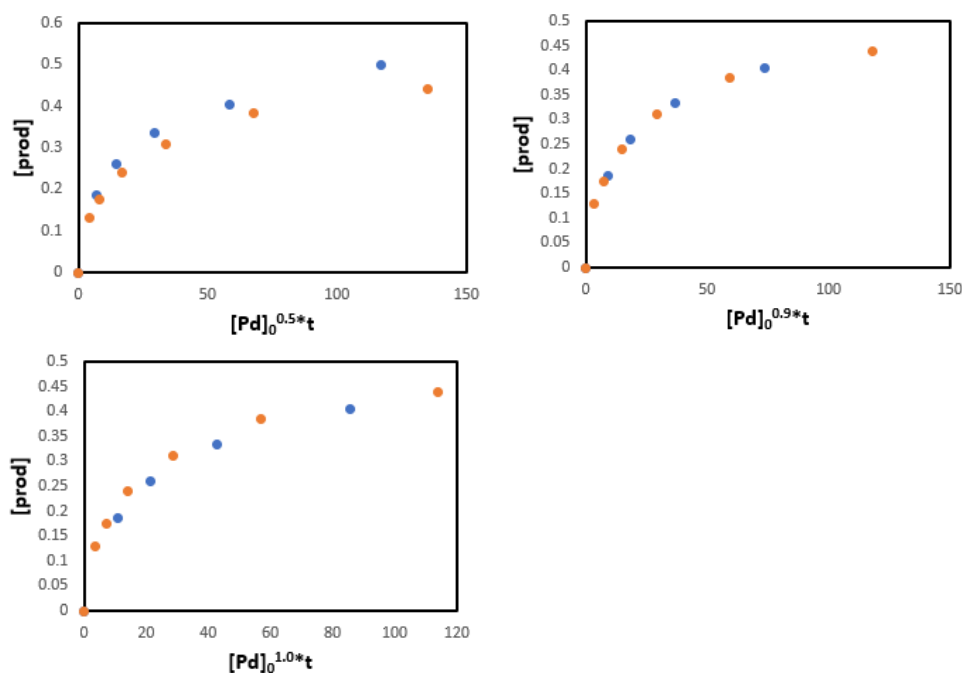

**Figure S41.** Variable time normalization analysis (VTNA) of reactions conducted with either 2.5  $\mu\text{mol}$  or 5.0  $\mu\text{mol}$  of catalyst **1**.

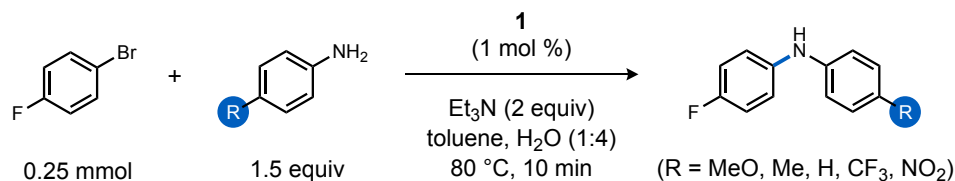

**Linear free-energy relationship (LFER) studies with respect to *para*-substituted anilines.**

Five parallel reactions were performed using a *para*-substituted aniline (*p*-R-C<sub>6</sub>H<sub>4</sub>NH<sub>2</sub>; R = MeO, Me, H, CF<sub>3</sub>, or NO<sub>2</sub>). To an oven-dried 4 mL scintillation vial equipped with a stir bar was charged with 1-bromo-4-fluorobenzene (27  $\mu$ L, 0.25 mmol, 1.0 equiv), aniline (0.38 mmol), triethylamine (70  $\mu$ L, 0.5 mmol), trifluorotoluene (internal standard, 10  $\mu$ L, 83  $\mu$ mol), **1** (1.8 mg, 2.5  $\mu$ mol, 1 mol %), and toluene (0.5 mL). The vial was capped with a puncturable PTFE-lined cap and was taken out of the glovebox. Under N<sub>2</sub> atmosphere, degassed deionized water (3 mL) was injected into the vial and the reaction mixture was left stirring vigorously at 80  $^\circ$ C. Aliquots (20  $\mu$ L) were taken at 2, 4, 6, 8, and 10 minutes and were quenched by dilution into CDCl<sub>3</sub> (0.6 mL) at RT in an NMR tube. The yields at each time were determined by <sup>19</sup>F NMR using a quantitative, single-scan experiment (acquisition time of 1.46 s and recycle delay time (d1) of 10 s). Data were fit by linear regression analysis of plots of [product] vs. time at conversions of  $\leq$ 30% yield.<sup>5,8</sup> A Hammett analysis was performed using the initial rates and corresponding substituent constants ( $\sigma_p$ ).<sup>9</sup> A  $\rho$  value of +0.3 was determined from the slope of this plot.

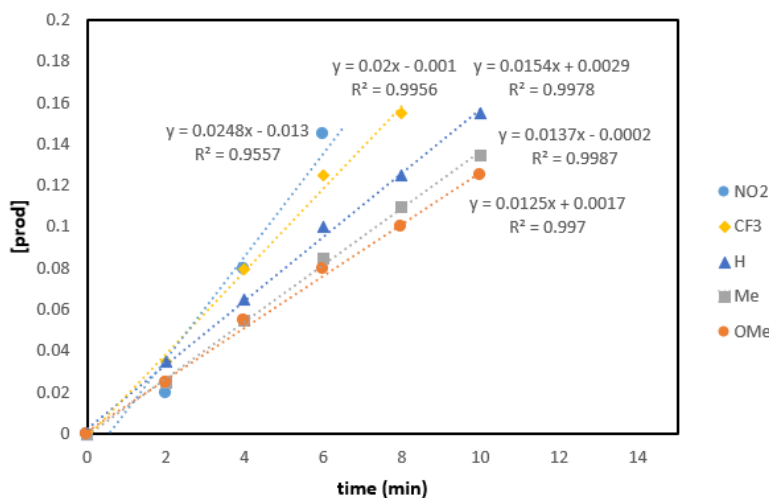

**Figure S42.** Determination of the initial rate of reactions between 4-FC<sub>6</sub>H<sub>4</sub>Br and a *para*-substituted aniline under the conditions noted above.

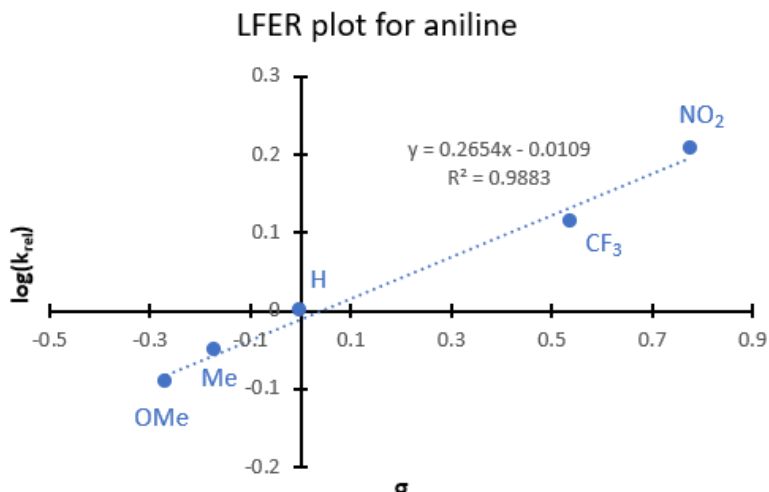

**Figure S43.** Hammett plot determined from initial rates of reactions between 4-FC<sub>6</sub>H<sub>4</sub>Br and a *para*-substituted aniline under the conditions noted above.

**C<sub>6</sub>H<sub>5</sub>ND<sub>2</sub>.** To a 20 mL scintillation vial equipped with a stir bar was charged with aniline (0.5 mL, 5.5 mmol), D<sub>2</sub>O (5.0 mL, 0.28 mol, 51 equiv), and DCM (2 mL). The mixture was stirred at room temperature for 3 min. The organic layer was extracted with DCM and washed with D<sub>2</sub>O (3 mL x 2), dried over sodium sulfate, and concentrated under reduced pressure. <sup>1</sup>H NMR taken in CDCl<sub>3</sub> indicated the absence of NH<sub>2</sub> resonances.

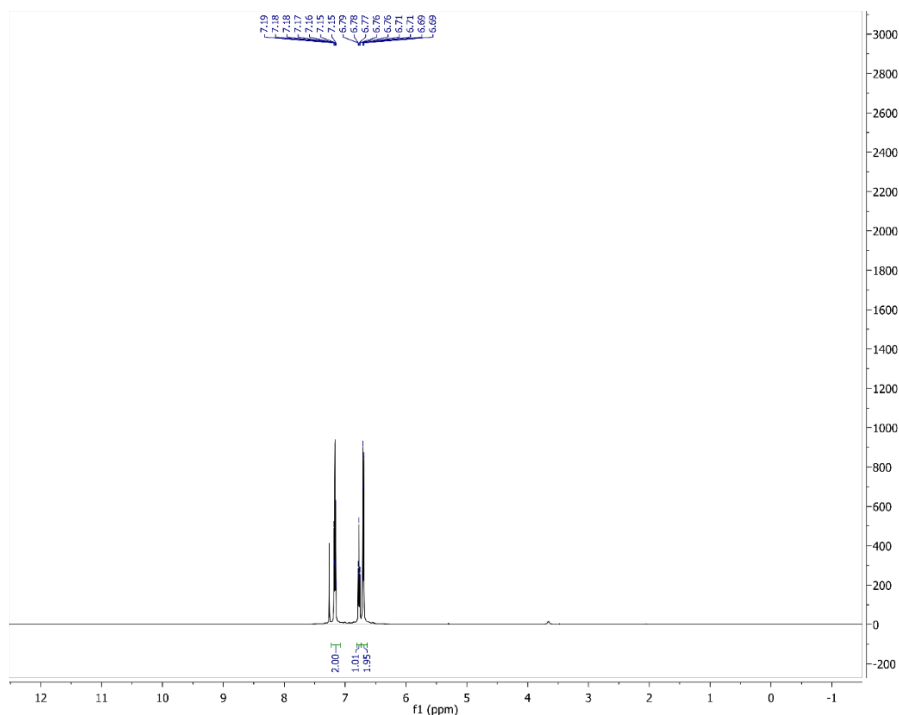

**Figure S44.** <sup>1</sup>H NMR spectrum (500 MHz, CDCl<sub>3</sub>) of C<sub>6</sub>H<sub>5</sub>ND<sub>2</sub>.

**Kinetic isotope effect (KIE) experiments.** To an oven-dried 4 mL scintillation vial equipped with a stir bar was charged with 1-bromo-4-fluorobenzene (27  $\mu\text{L}$ , 0.25 mmol, 1.0 equiv),  $\text{C}_6\text{H}_5\text{NH}_2$  (0.38 mmol), triethylamine (70  $\mu\text{L}$ , 0.5 mmol), trifluorotoluene (internal standard, 10  $\mu\text{L}$ , 83  $\mu\text{mol}$ ), **1** (1.8 mg, 2.5  $\mu\text{mol}$ , 1 mol %), and toluene (0.5 mL). The vial was capped with a puncturable PTFE-lined cap and was taken out of the glovebox. Under  $\text{N}_2$  atmosphere, degassed deionized water (3 mL) was injected into the vial and the reaction mixture was left stirring vigorously at 80  $^\circ\text{C}$ . Aliquots (20  $\mu\text{L}$ ) were taken at 2, 4, 6, 8, and 10 minutes and were quenched by dilution into  $\text{CDCl}_3$  (0.6 mL) at RT in an NMR tube. The yields at each time were determined by  $^{19}\text{F}$  NMR using a quantitative, single-scan experiment (acquisition time of 1.46 s and recycle delay time (d1) of 10 s). Data were fit by linear regression analysis of plots of [**3**] vs. time at conversions of  $\leq 30\%$  yield. The experiment and data analysis were repeated with substitution of  $\text{C}_6\text{H}_5\text{ND}_2$  for  $\text{C}_6\text{H}_5\text{NH}_2$  and  $\text{D}_2\text{O}$  for  $\text{H}_2\text{O}$ . The KIE was calculated according to the equation:

$$\text{KIE} = \frac{k_{\text{H}}}{k_{\text{D}}} = \frac{0.154}{0.127} = 1.2$$

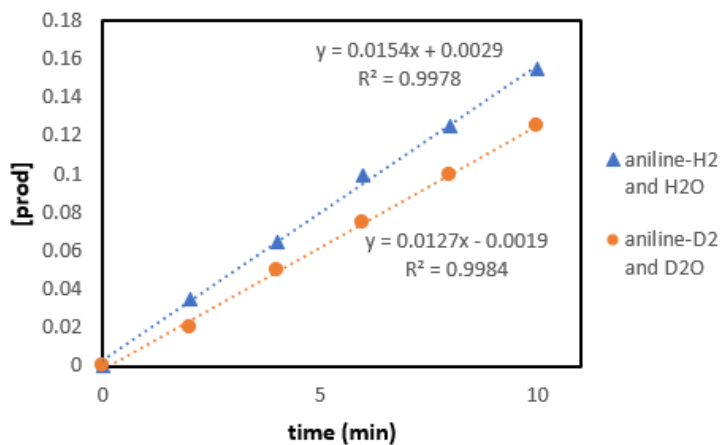

**Figure S45.** Plot of product (**3**) formation versus time during reactions with aniline isotopologues.



**Kinetic simulations.** A rate law was derived for the catalytic cycle below involving the proposed formation of off-cycle species **C·D** (e.g., **34**).

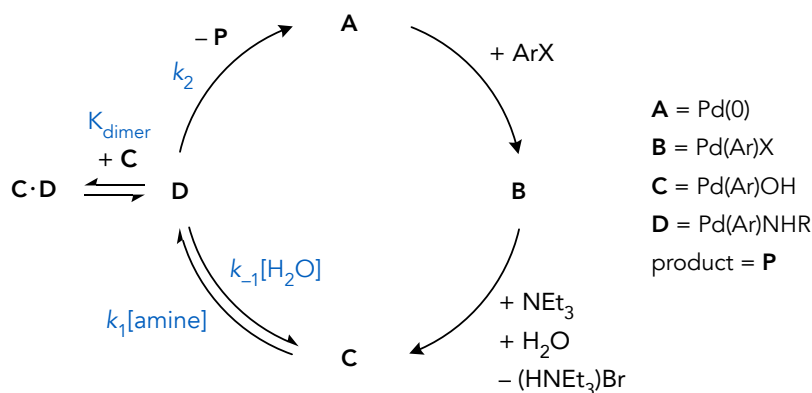

Expressions for **[C]** (eq S1) and **[C·D]** (eq S2) using the steady-state approximation:

$$\frac{d[\mathbf{D}]}{dt} = k_1[\mathbf{C}][\text{amine}] - k_{-1}[\mathbf{H}_2\mathbf{O}][\mathbf{D}] - k_2[\mathbf{D}] = 0$$

$$[\mathbf{C}] = \left( \frac{k_{-1}[\mathbf{H}_2\mathbf{O}] + k_2}{k_1[\text{amine}]} \right) [\mathbf{D}] \quad (\text{S1})$$

$$\frac{d[\mathbf{C}\cdot\mathbf{D}]}{dt} = k_{\text{dimer}}[\mathbf{C}][\mathbf{D}] - k_{-\text{dimer}}[\mathbf{C}\cdot\mathbf{D}] = 0$$

$$[\mathbf{C}\cdot\mathbf{D}] = K_{\text{dimer}} [\mathbf{C}][\mathbf{D}] \quad (\text{S2})$$

An expression for the mass balance of kinetically relevant catalyst species, stipulating that **[A]** and **[B]** are approximately zero based on kinetic data in Figures S38 and S40:

$$[\text{Pd}]_{\text{total}} \cong [\mathbf{C}] + [\mathbf{D}] + 2[\mathbf{C}\cdot\mathbf{D}] \quad (\text{S3})$$

Combining eqs S1 and S2 with eq S3 gives:

$$[\text{Pd}]_{\text{total}} = \left( \frac{k_{-1}[\mathbf{H}_2\mathbf{O}] + k_2}{k_1[\text{amine}]} \right) [\mathbf{D}] + [\mathbf{D}] + 2K_{\text{dimer}} \left( \frac{k_{-1}[\mathbf{H}_2\mathbf{O}] + k_2}{k_1[\text{amine}]} \right) [\mathbf{D}]^2 \quad (\text{S4})$$

The expression for the rate of product formation is given in eq S5:

$$\frac{d[\mathbf{P}]}{dt} = k_2 [\mathbf{D}] \quad (\text{S5})$$

Substituting for  $[D]$ , which was determined by quadratic factoring of eq S4,<sup>10</sup> in eq S5 gives:

$$r = \frac{2k_2[Pd]_{total}}{(1 + f) + \{(1 + f)^2 + 8K_{dimer}f[Pd]_{total}\}^{1/2}} \quad \text{where } f = \left( \frac{k_{-1}[H_2O] + k_2}{k_1[amine]} \right) \quad (S6)$$

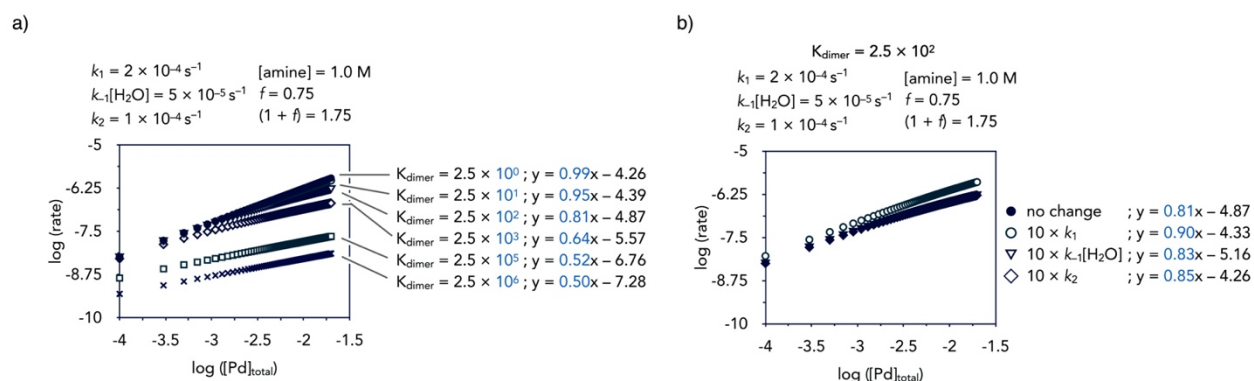

**Figure S46.** Kinetic simulations to determine the change in catalyst order from (a) variation of  $K_{dimer}$ , or (b) variation of other elementary rate constants by  $10\times$  at fixed  $K_{dimer} = 2.5 \times 10^2$ .

Simulated kinetic data were calculated using eq S6. Values for elementary rate constants were selected arbitrarily with relative magnitudes estimated to be  $k_2 < k_1 \gg k_{-1}$  based on the results of stoichiometric reactions. The order in catalyst was determined by the slope of linear regression analysis of calculated plots of  $\log(\text{rate})$  versus  $\log([Pd]_{total})$  shown in Figure S48a. The experimentally determined value for the order in catalyst of 0.9 is thus consistent with the predicted fractional values for  $[Pd]_{total}$  at moderate values of  $K_{dimer}$ . Adjusting the arbitrary elementary rate constant values (Figure S48b) does influence the calculated catalyst order but to a lesser extent than a comparable change to the dimerization equilibrium at moderate values of  $K_{dimer}$  (e.g.,  $K_{dimer} = 10^2$ – $10^4$ ). These data also suggest catalyst orders approaching the upper boundary of 1 can occur even when the off-cycle mixed dimer  $C \cdot D$  (i.e., **34**) is thermodynamically favored (e.g.,  $K_{dimer} = 2.5$ – $25$ ).

$$\chi([\mathbf{D}]) = \frac{r}{k_2[\mathbf{Pd}]_{\text{total}}} \quad (\text{S7})$$

$$\chi([\mathbf{C}]) = \frac{f[\mathbf{D}]}{[\mathbf{Pd}]_{\text{total}}} \quad (\text{S8})$$

$$\chi([\mathbf{C}\cdot\mathbf{D}]) = \frac{2K_{\text{dimer}}[\mathbf{C}][\mathbf{D}]}{[\mathbf{Pd}]_{\text{total}}} \quad (\text{S9})$$

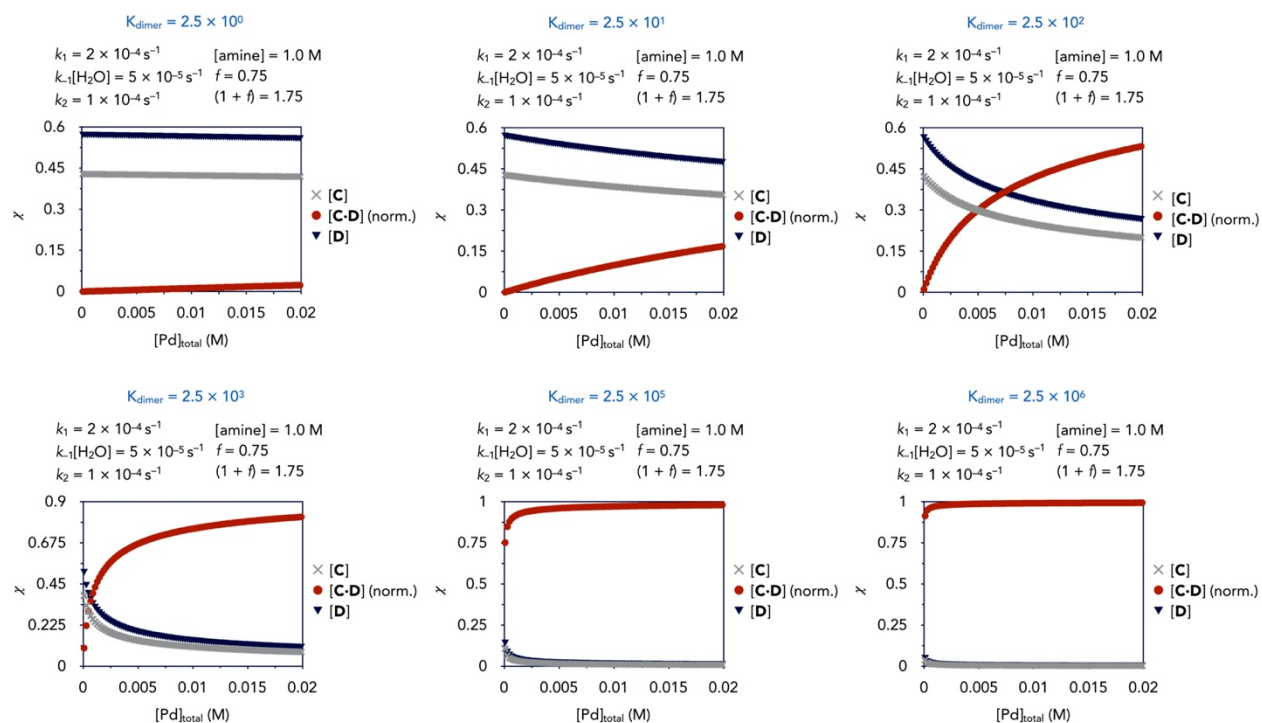

**Figure S47.** Simulations of catalyst speciation between **C**, **C·D** (normalized,  $2\times$  versus **C** or **D**), and **D** at different  $K_{\text{dimer}}$  values and the specified elementary rate constants as using eqs S7–S9.

Data shown in Figure S49 illustrate the relative mol fraction ( $\chi$ ) of catalytic intermediates at different catalyst loadings and different values of  $K_{\text{dimer}}$ . The possibility for the off-cycle aggregate **C·D** to comprise a significant or even major proportion of the total Pd mass balance is apparent even when the catalyst order falls toward the upper boundary (e.g.,  $K_{\text{dimer}} = 2.5 \times 10^2$ ), which supports **C·D** as a reasonable resting state species under catalytic conditions giving rise to an experimental order in [1] of 0.9.

**Test for byproduct inhibition.** To a 100 mL 2-piece EasyMax vessel fitted with reflux condenser, pitched blade impeller, nitrogen inlet, and EasySampler probe (Note: Easysampler is fitted with the following solvent lines and reagents: Reaction = degassed H<sub>2</sub>O; Quench = acetone, non-degassed; Diluent = 2:1 MeCN:H<sub>2</sub>O, non-degassed; 450× dilution) was charged 4-bromo-1,1'-biphenyl (4.16 g, 17.5 mmol, 98% purity), 4-nitroaniline (3.70 g, 26.3 mmol, 1.5 equiv, 98% purity) with or without triethylammonium bromide (1.626 g, 8.75 mmol, 0.5 equiv, 98% purity). The vessel was sealed and purged with N<sub>2</sub> for at least 10 minutes. Degassed H<sub>2</sub>O (70 mL), toluene (15 mL, commercially available anhydrous solvent from Millipore Sigma), and degassed triethylamine (4.93 mL, 35.0 mmol, 2 equiv, 99% purity) were charged to the reactor via syringe (inert handling) with agitation set at 800 RPM. The reactor mixture was then heated to an internal temperature of 60 °C. To a 4 mL vial with PTFE septum and magnetic stir bar was charged complex **1** (63 mg, 0.088 mmol, 0.5 mol %). The vial was then inerted with N<sub>2</sub>, and toluene (2.5 mL) was charged via syringe (inert handling). The slurry was allowed to stir and age (~5 min) whereupon it was charged to the reactor via syringe (inert handling). The syringe was rinsed with the reactor contents (2x's) and sampling was initiated using the Easysampler.

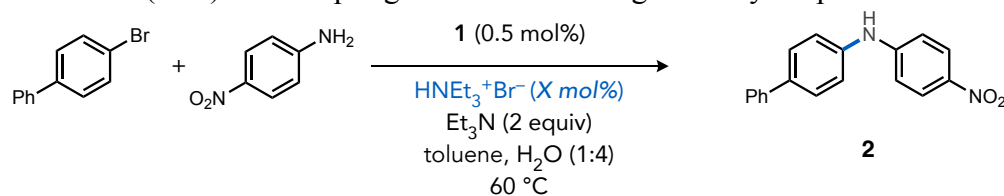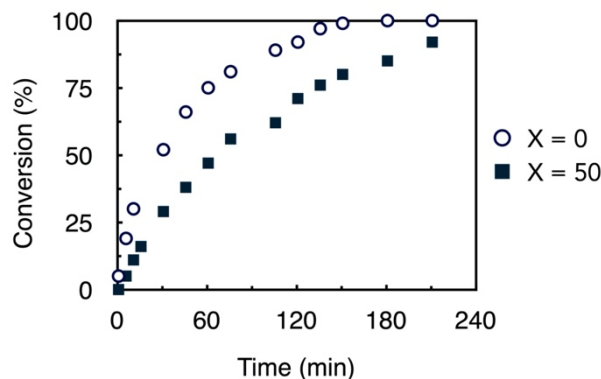

**Figure S48.** Reaction profile for formation of **2** from 4-bromobiphenyl in the presence or absence of added (HNEt<sub>3</sub>)<sup>+</sup>Br<sup>-</sup> (50 mol %) under conditions of general procedure A, expect with 0.5 mol % catalyst at 60 °C to modulate the rate for ease of data sampling.

The modest inhibitory effect of the rate with added exogenous bromide could indicate reversibility in the ionization equilibrium converting (Ad<sub>3</sub>P)Pd(Ar)X (X = Br, Cl) intermediates to [(Ad<sub>3</sub>P)Pd(Ar)(OH<sub>2</sub>)]<sup>+</sup> species in the proposed catalytic mechanism. However, exogenous halide salts may also induce inhibitory effects during catalysis due to other potential effects on catalyst speciation between active and inactive states. For leading references on this topic, see ref. 11. Either rationalization seems plausible and further study required to differentiate unambiguously.

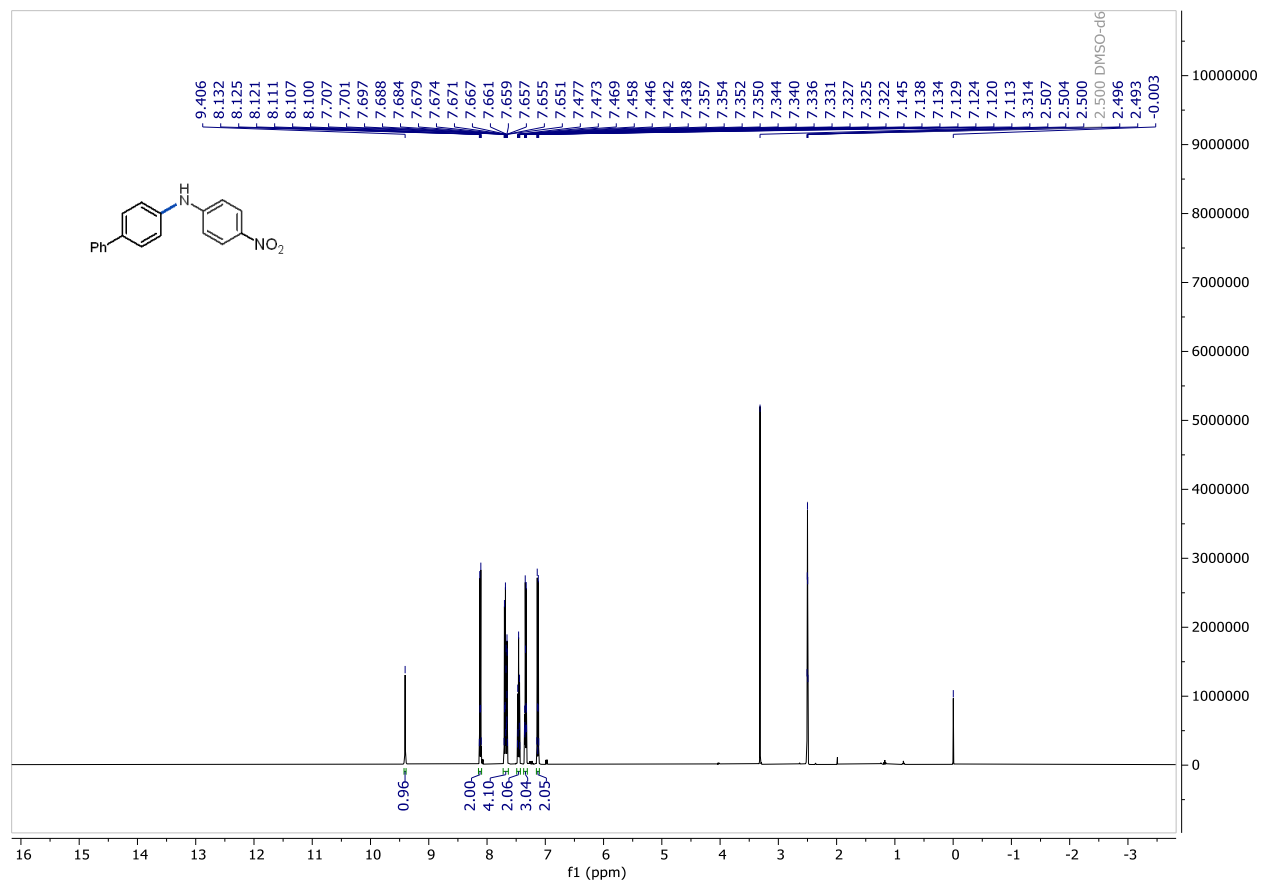

Figure S49. <sup>1</sup>H NMR (500 MHz, DMSO-*d*<sub>6</sub>) of 2.

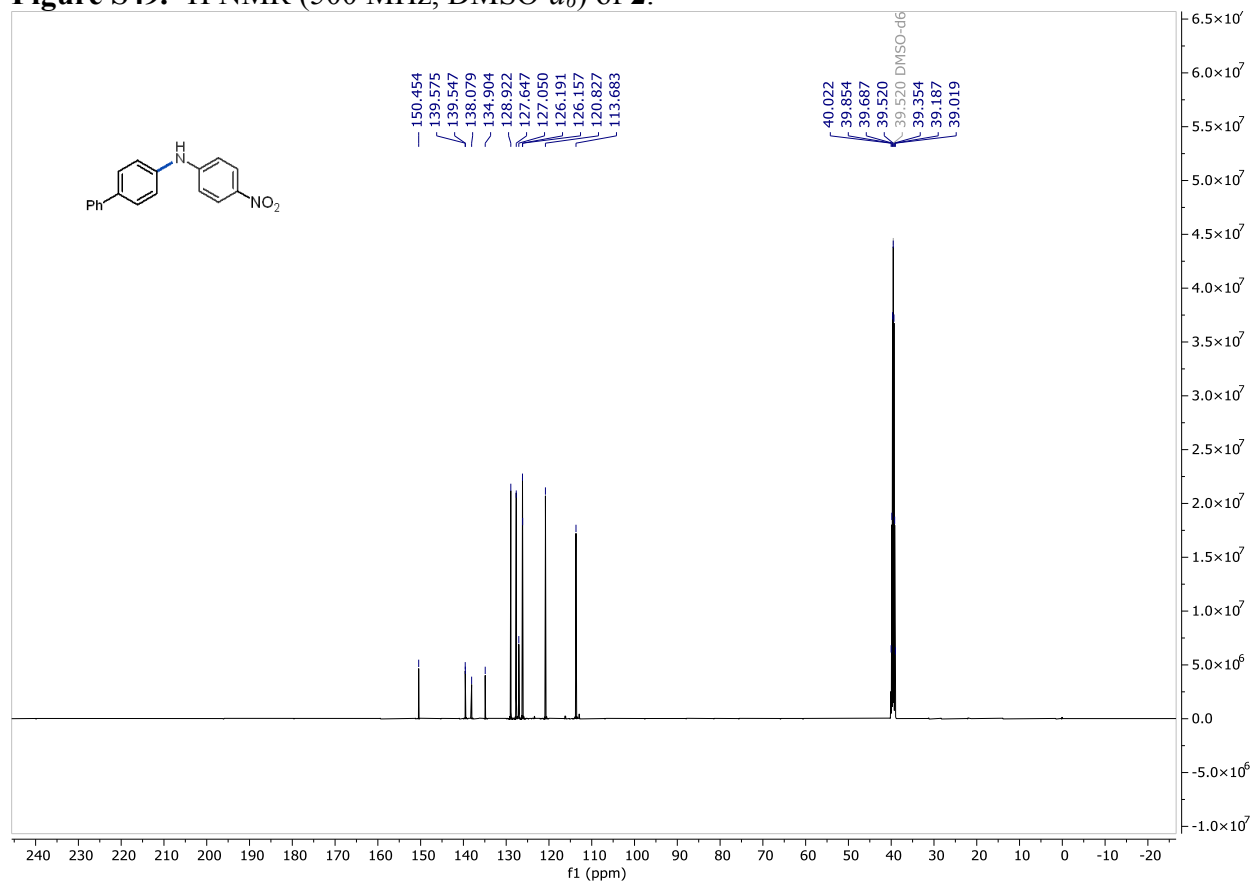

Figure S50. <sup>13</sup>C {<sup>1</sup>H} NMR (126 MHz, DMSO-*d*<sub>6</sub>) of 2.

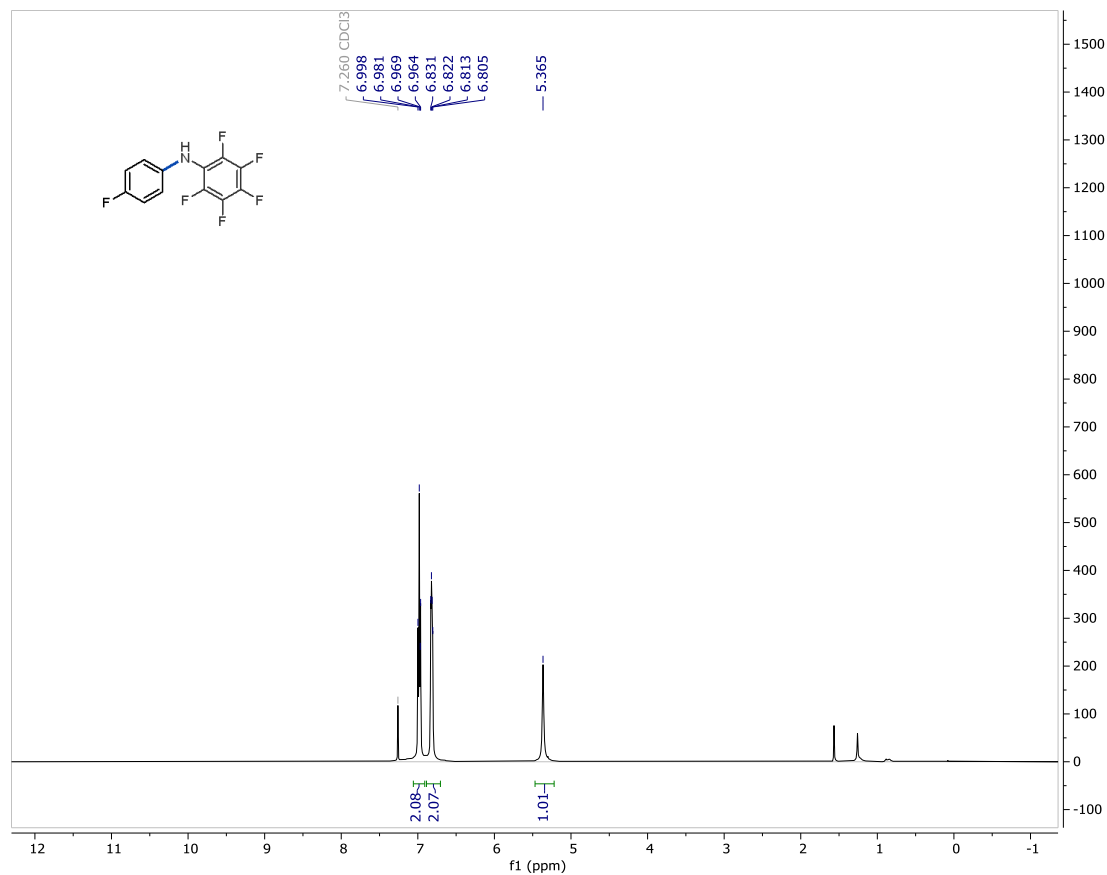

Figure S51. <sup>1</sup>H NMR (500 MHz, CDCl<sub>3</sub>) of 4.

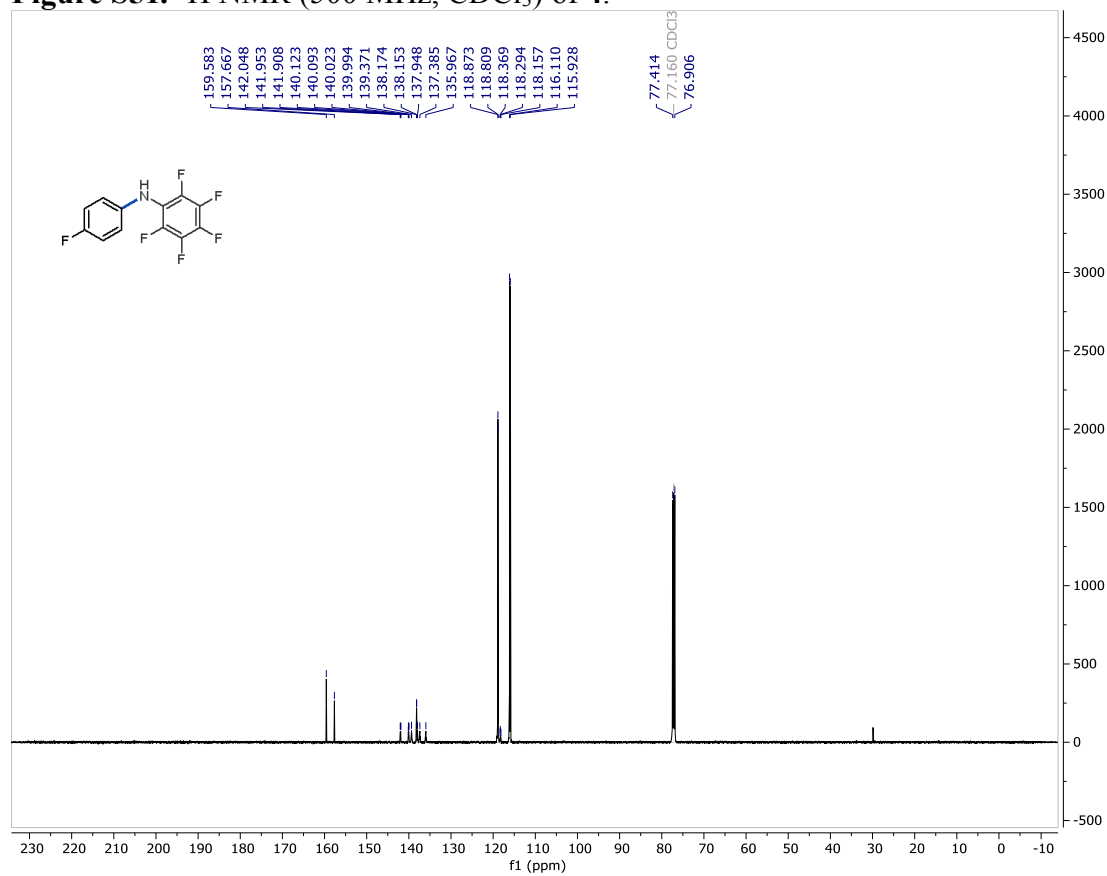

Figure S52. <sup>13</sup>C NMR (126 MHz, CDCl<sub>3</sub>) of 4.

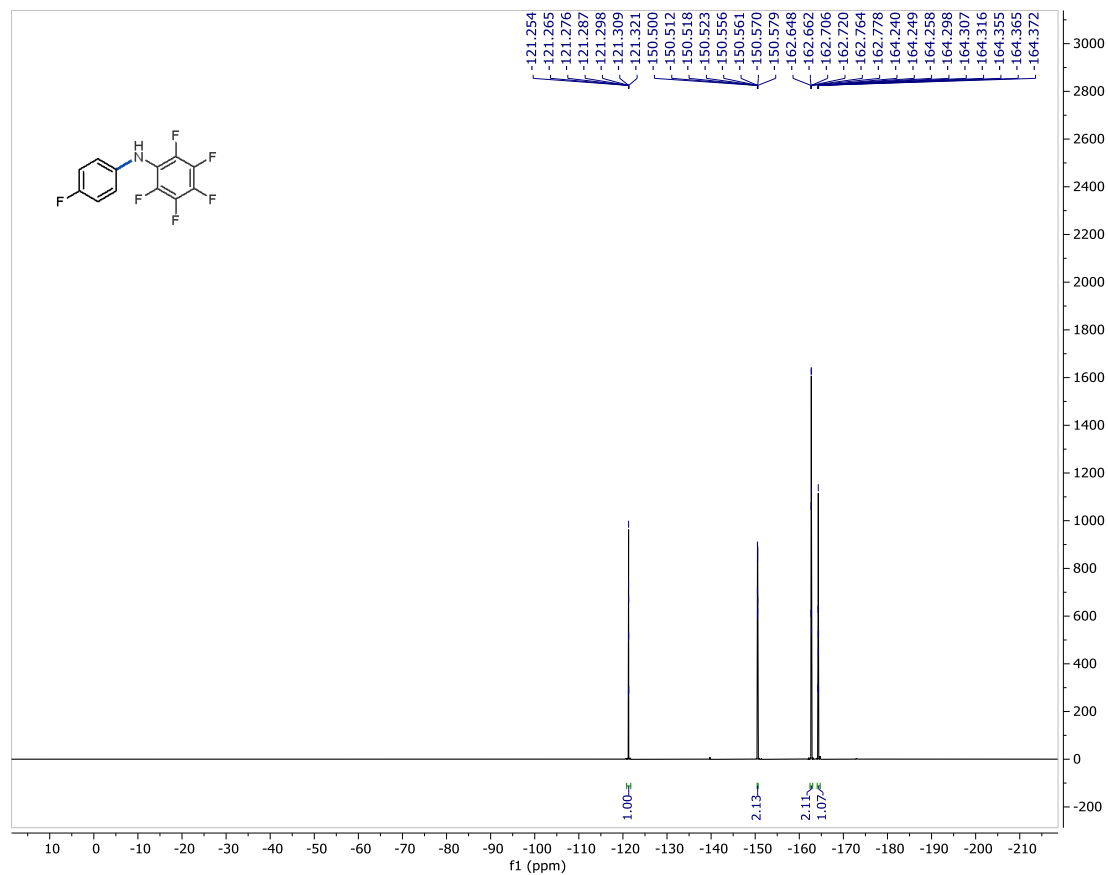

Figure S53.  $^{19}\text{F}$  NMR (376 MHz,  $\text{CDCl}_3$ ) of 4.

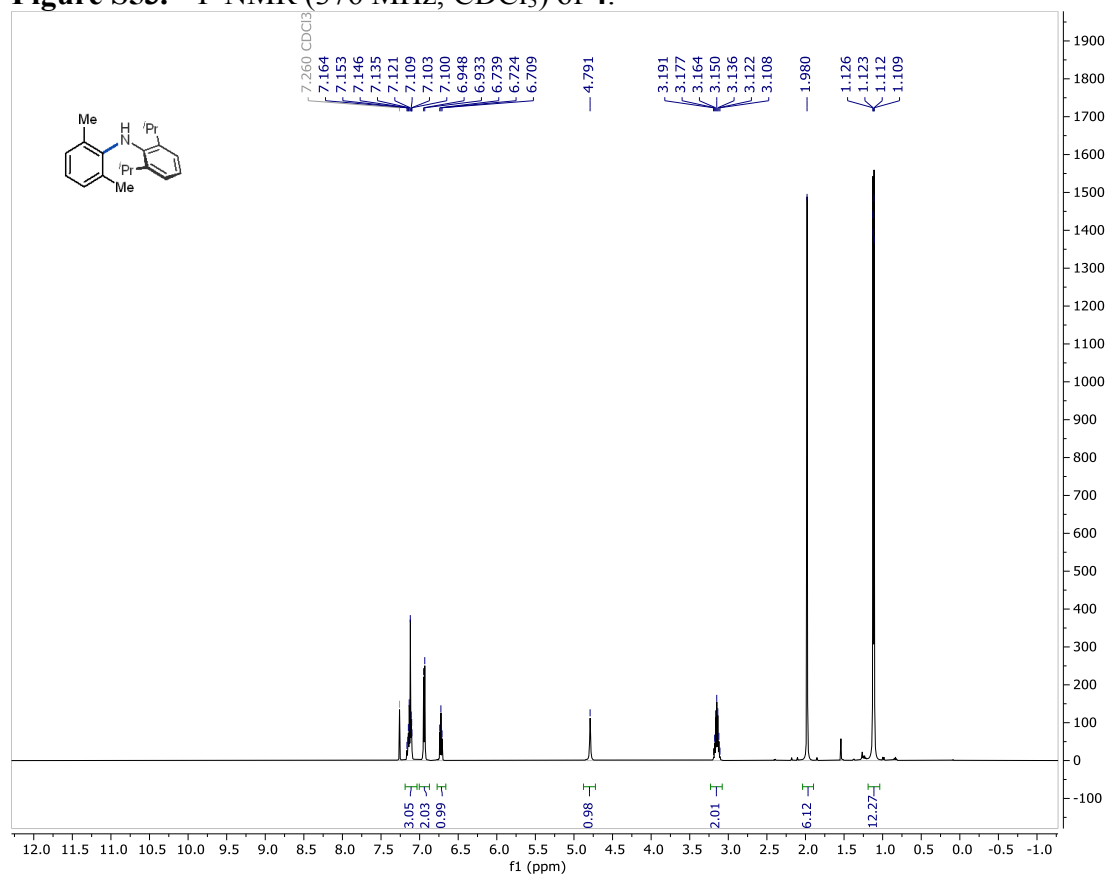

Figure S54.  $^1\text{H}$  NMR (500 MHz,  $\text{CDCl}_3$ ) of 5.

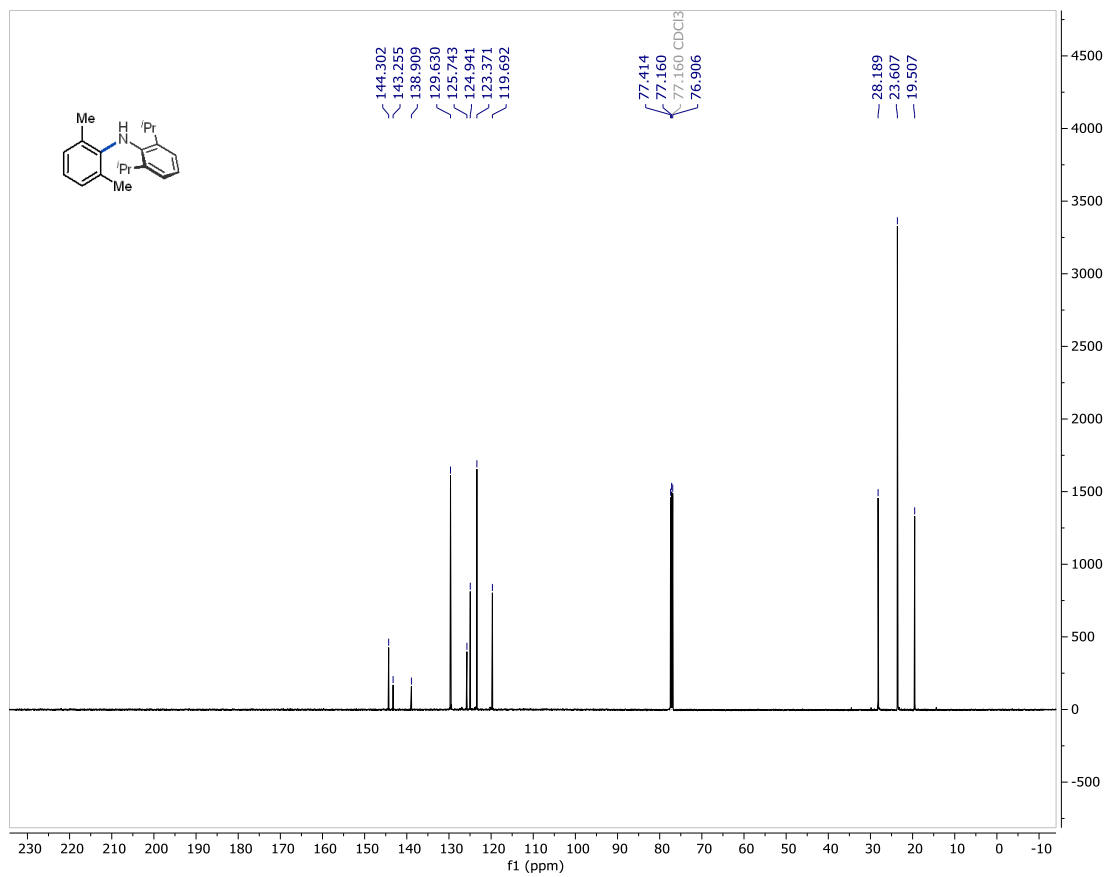

Figure S55.  $^{13}\text{C}$  NMR (126 MHz,  $\text{CDCl}_3$ ) of 5.

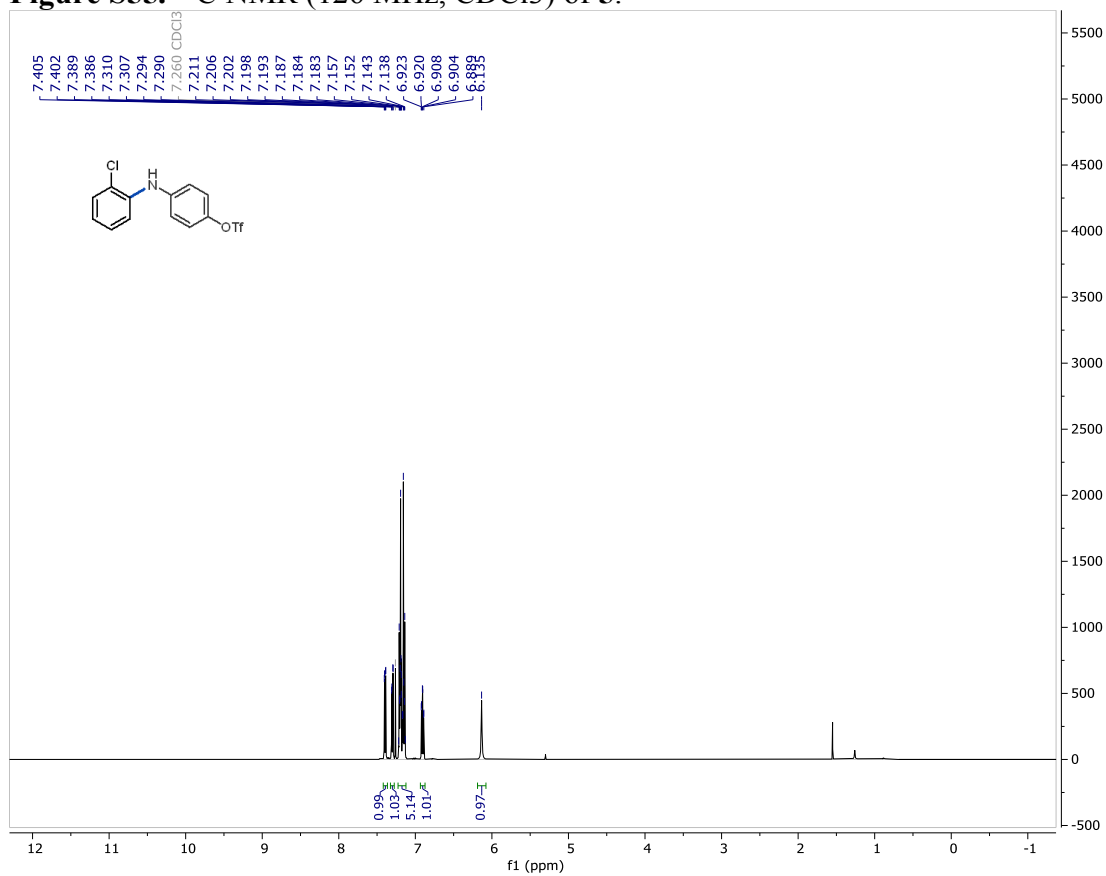

Figure S56.  $^1\text{H}$  NMR (500 MHz,  $\text{CDCl}_3$ ) of 6.



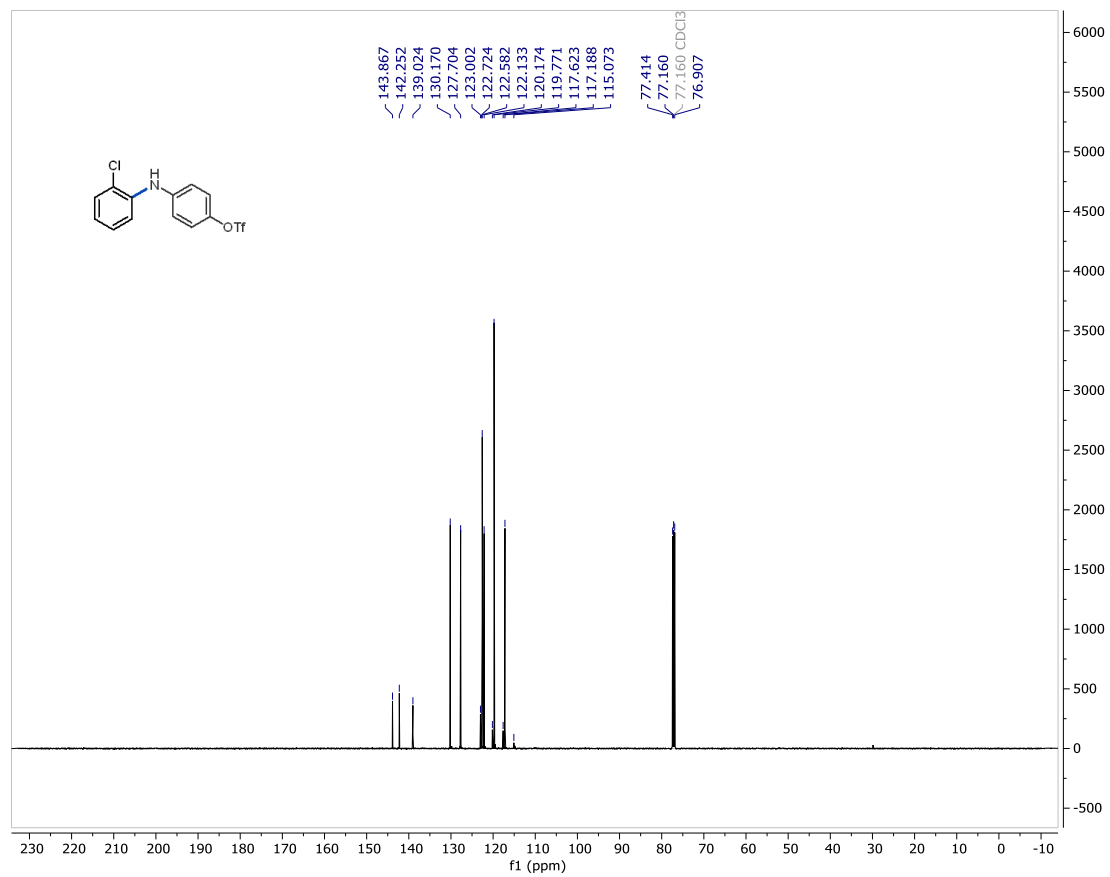

Figure S57.  $^{13}\text{C}$  NMR (126 MHz,  $\text{CDCl}_3$ ) of 6.

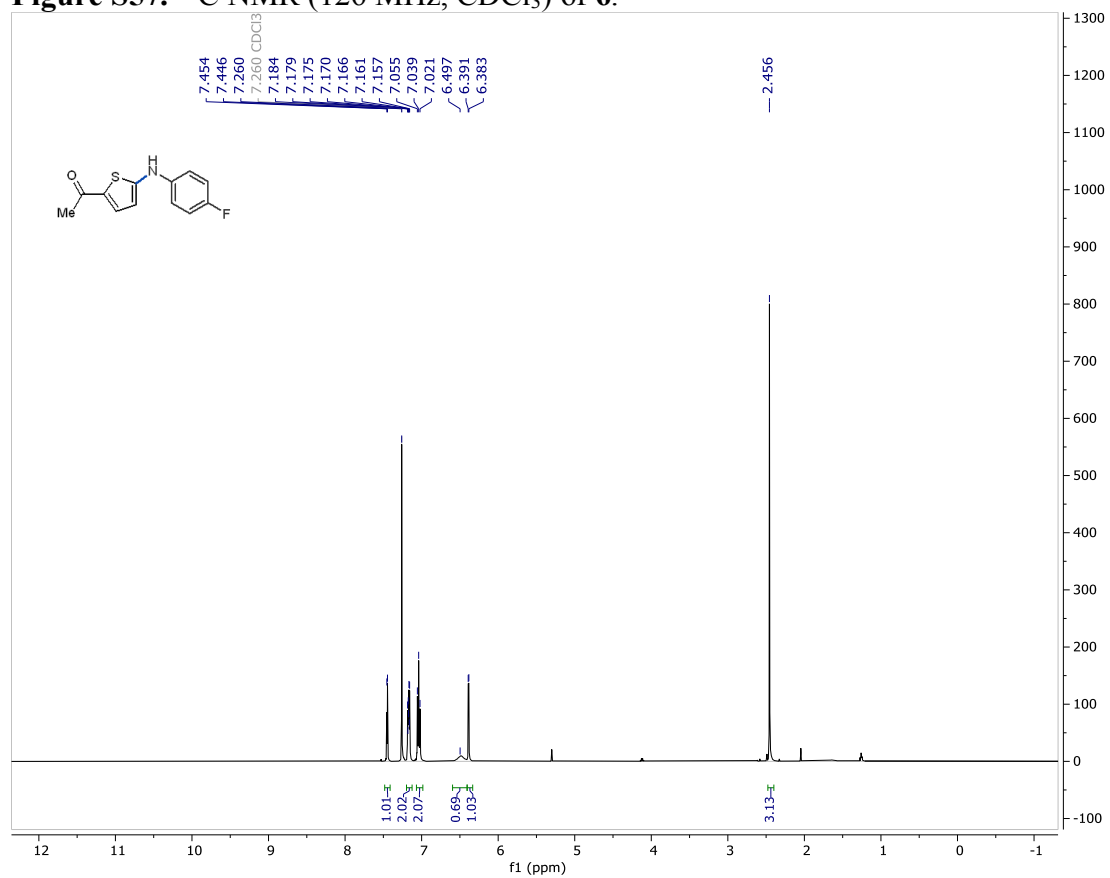

Figure S58.  $^1\text{H}$  NMR (500 MHz,  $\text{CDCl}_3$ ) of 7.

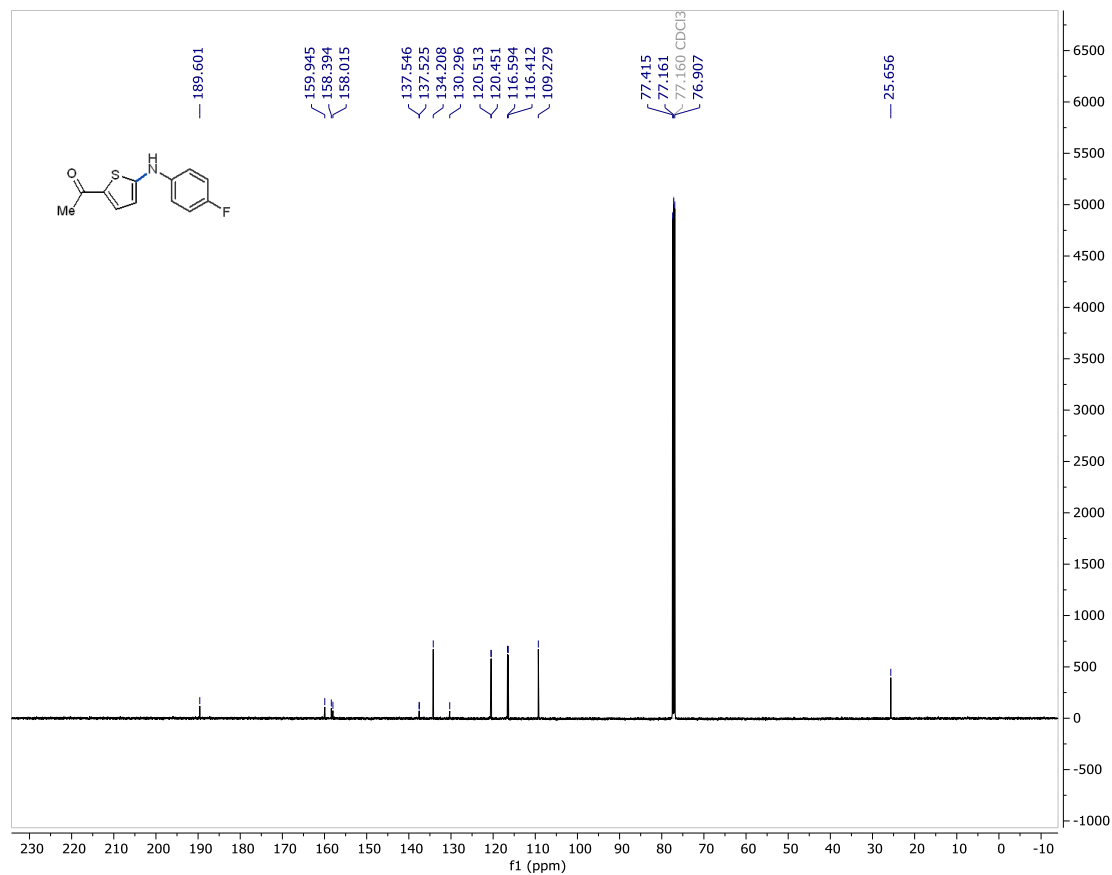

Figure S59. <sup>13</sup>C NMR (126 MHz, CDCl<sub>3</sub>) of 7.

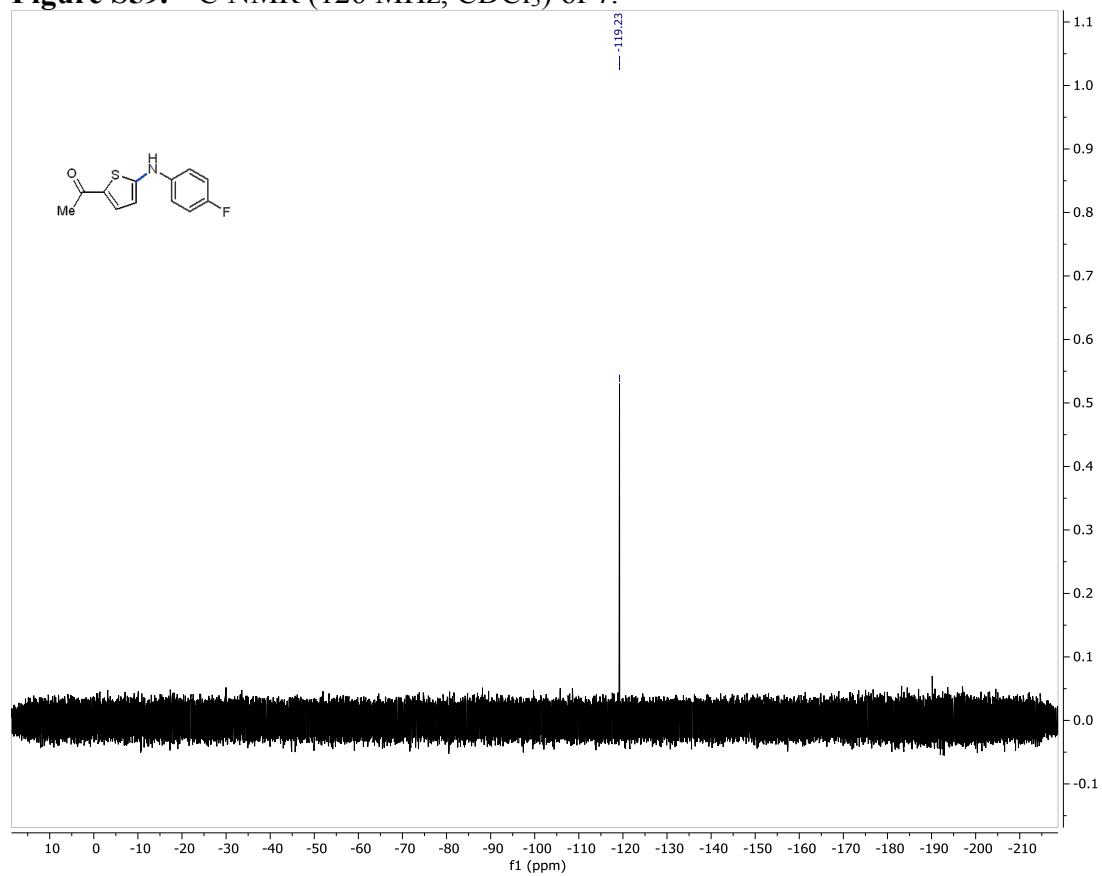

Figure S60. <sup>19</sup>F NMR (376 MHz, CDCl<sub>3</sub>) of 7.

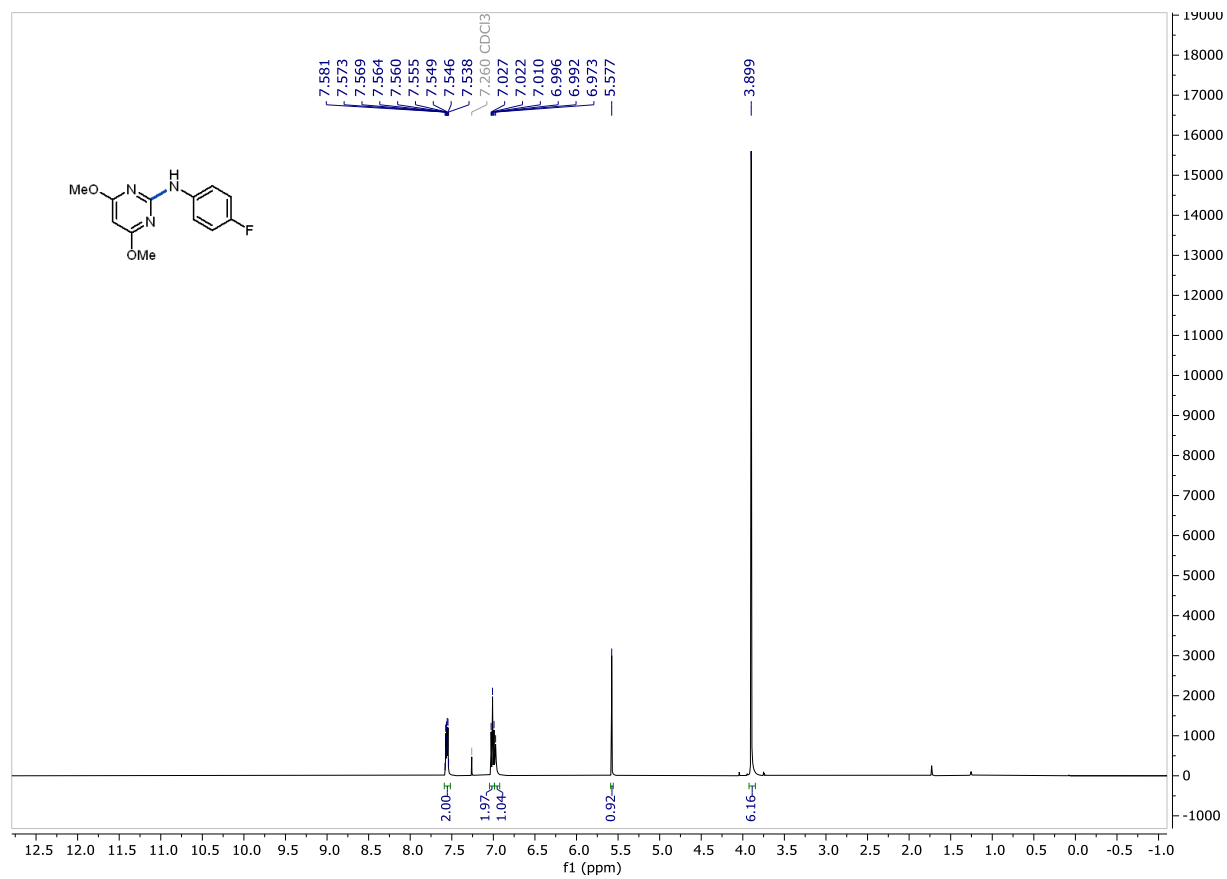

**Figure S61.** <sup>1</sup>H NMR (500 MHz, CDCl<sub>3</sub>) of **8**.

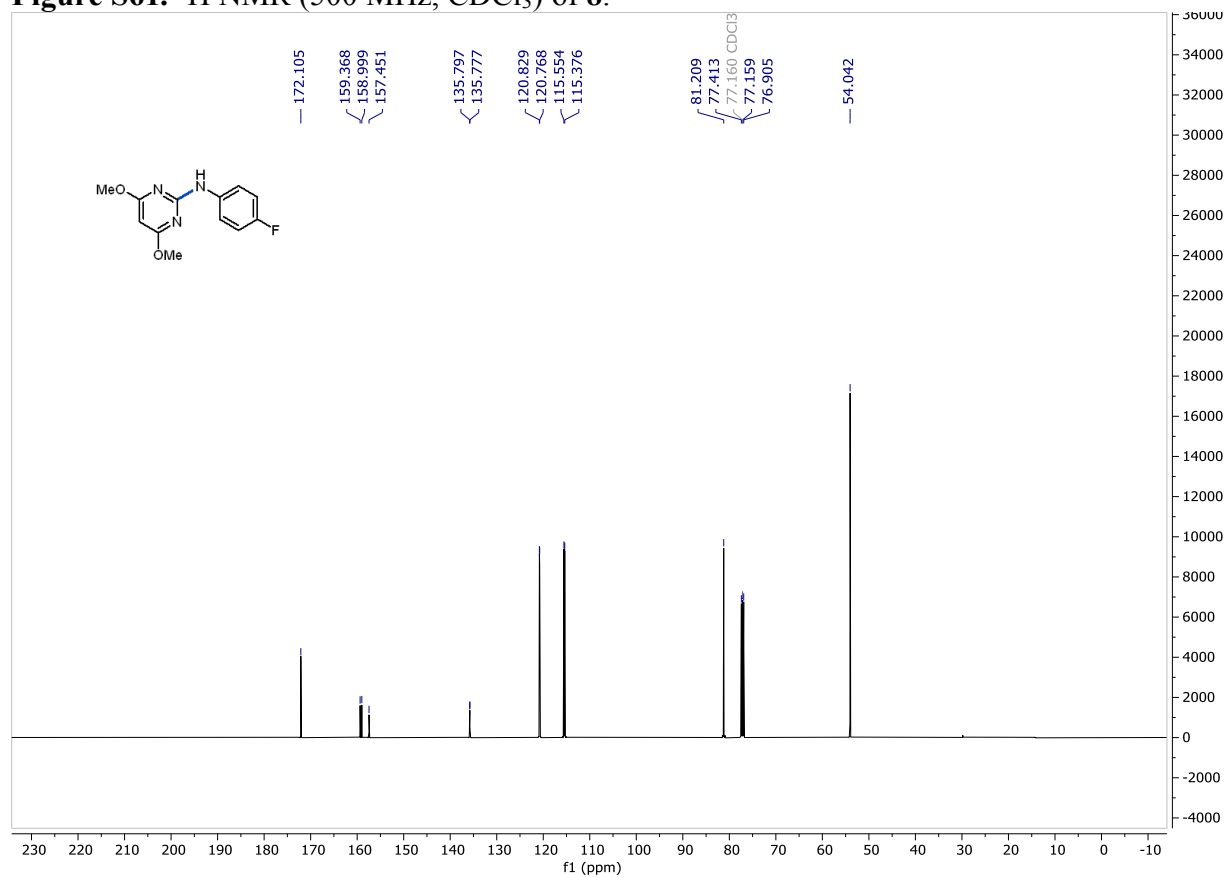

**Figure S62.** <sup>13</sup>C NMR (126 MHz, CDCl<sub>3</sub>) of **8**.

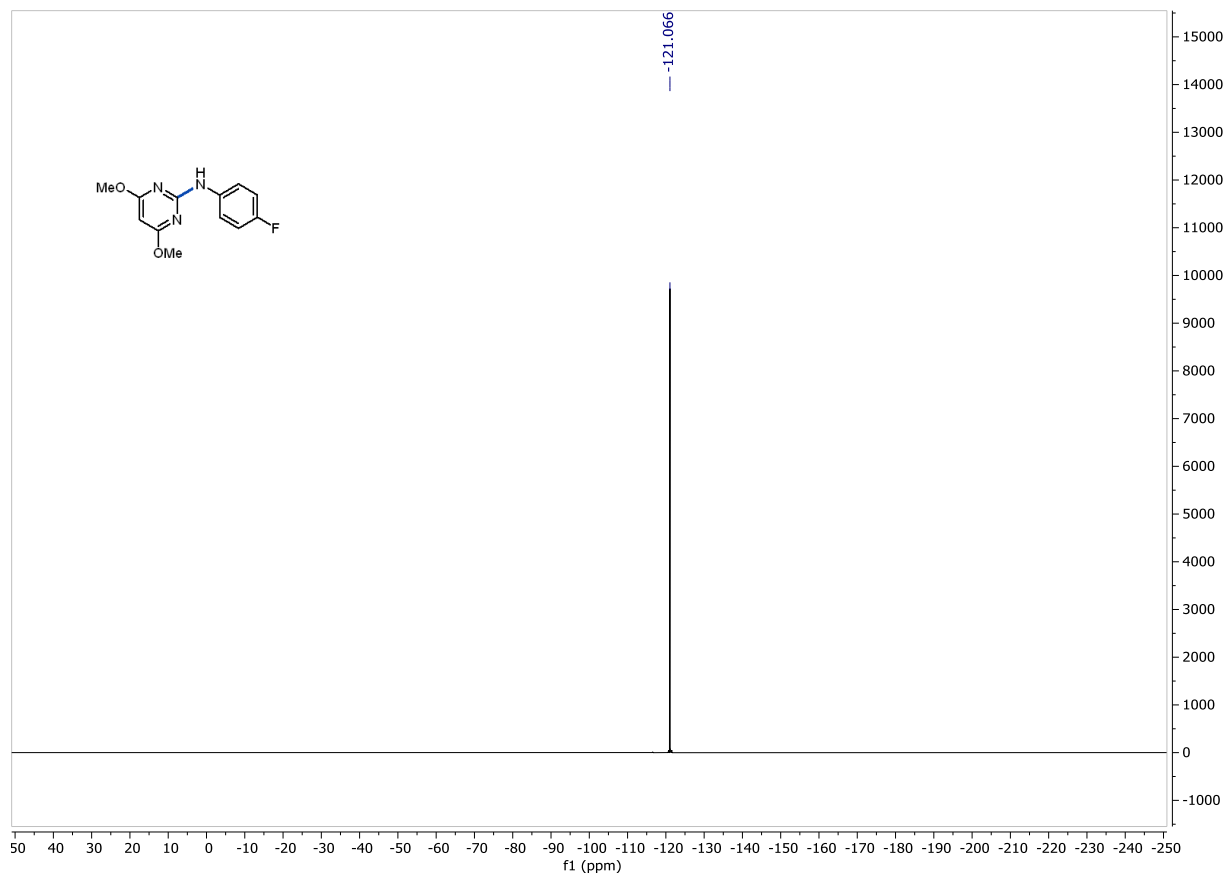

**Figure S63.** <sup>19</sup>F NMR (282 MHz, CDCl<sub>3</sub>) of **8**.

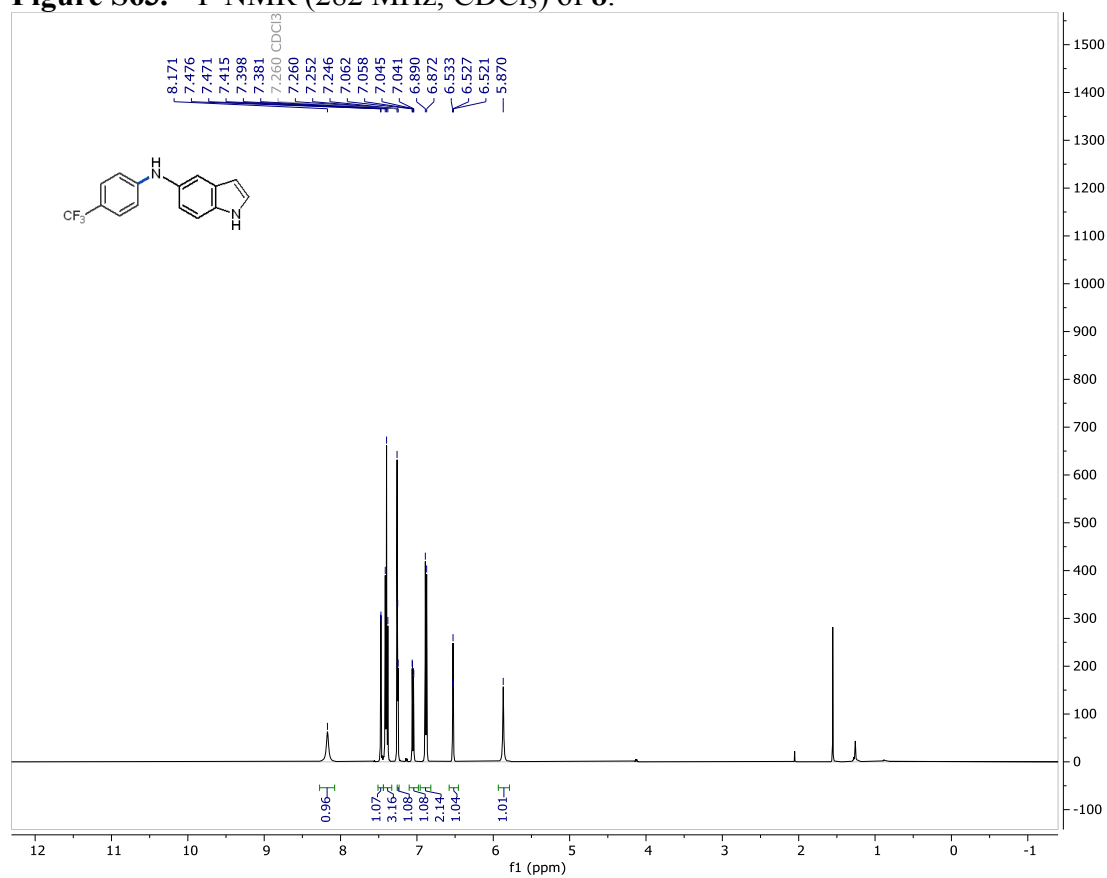

**Figure S64.** <sup>1</sup>H NMR (500 MHz, CDCl<sub>3</sub>) of **9**.

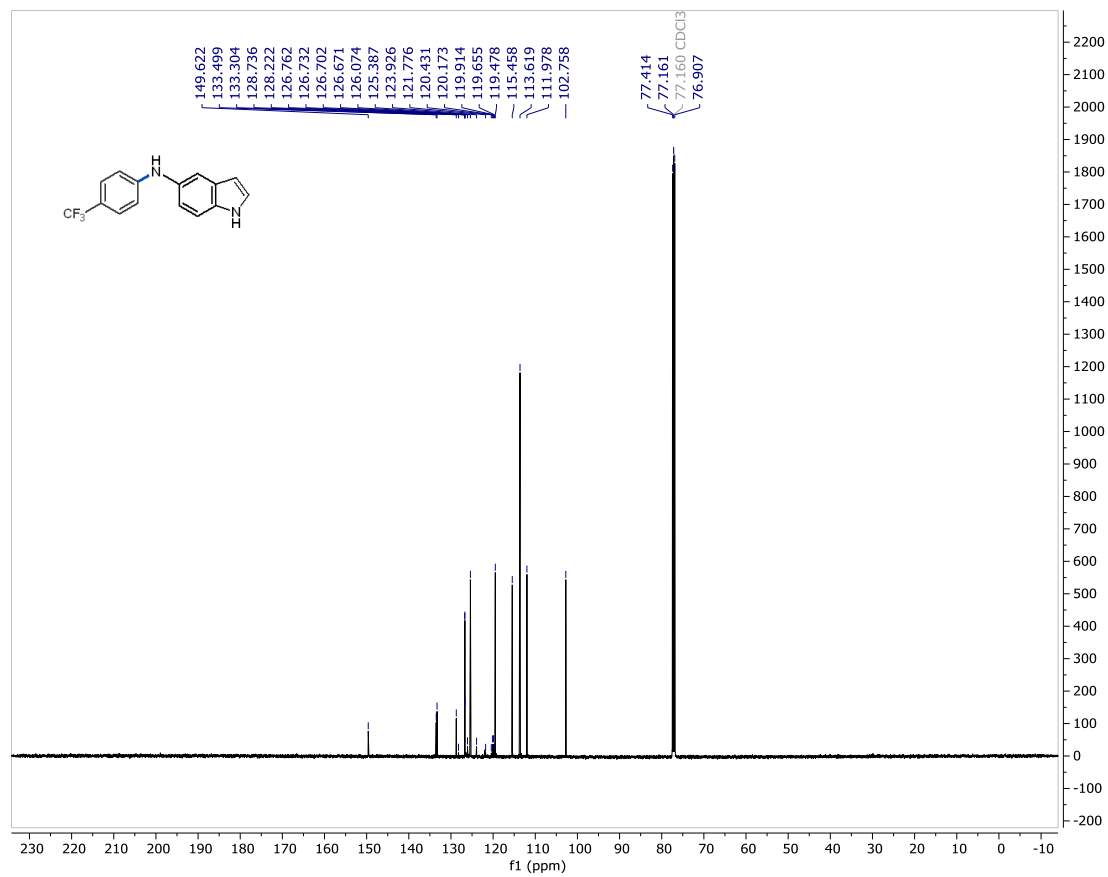

**Figure S65.** <sup>13</sup>C NMR (126 MHz, CDCl<sub>3</sub>) of **9**.

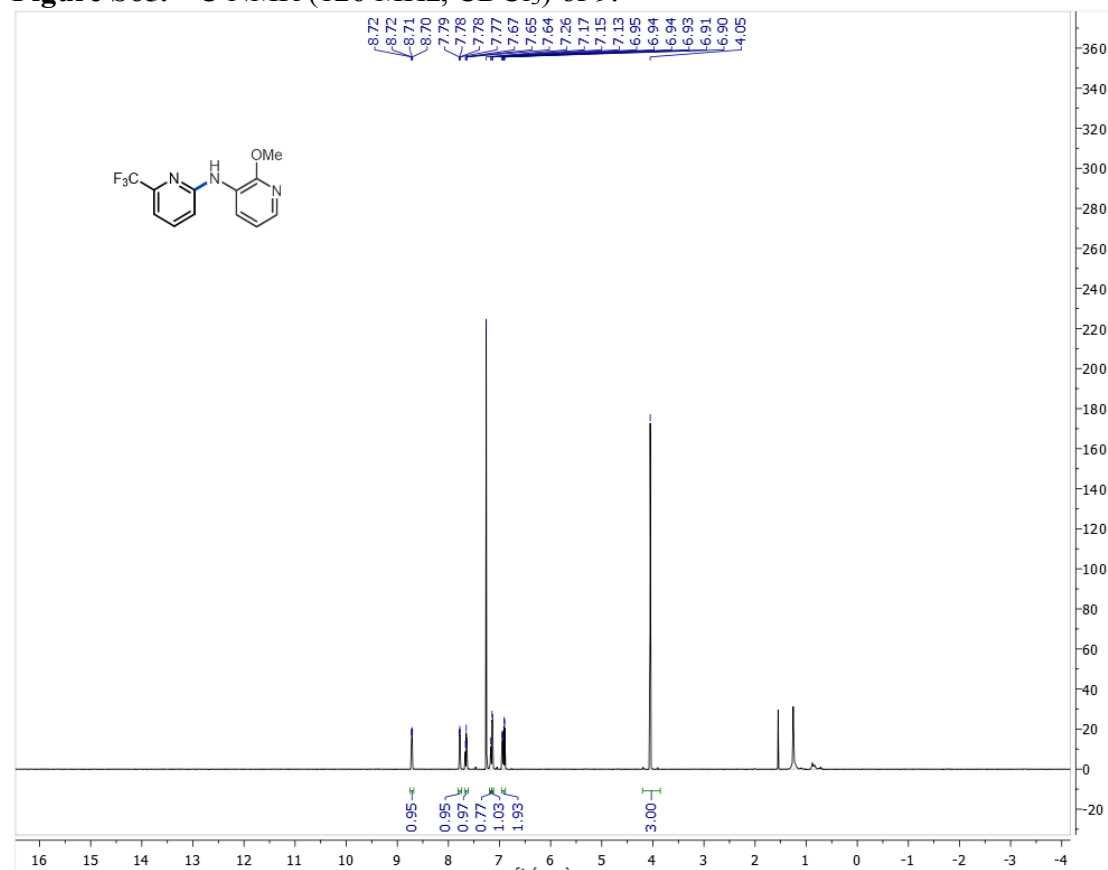

**Figure S66.** <sup>1</sup>H NMR (500 MHz, CDCl<sub>3</sub>) of **10**.

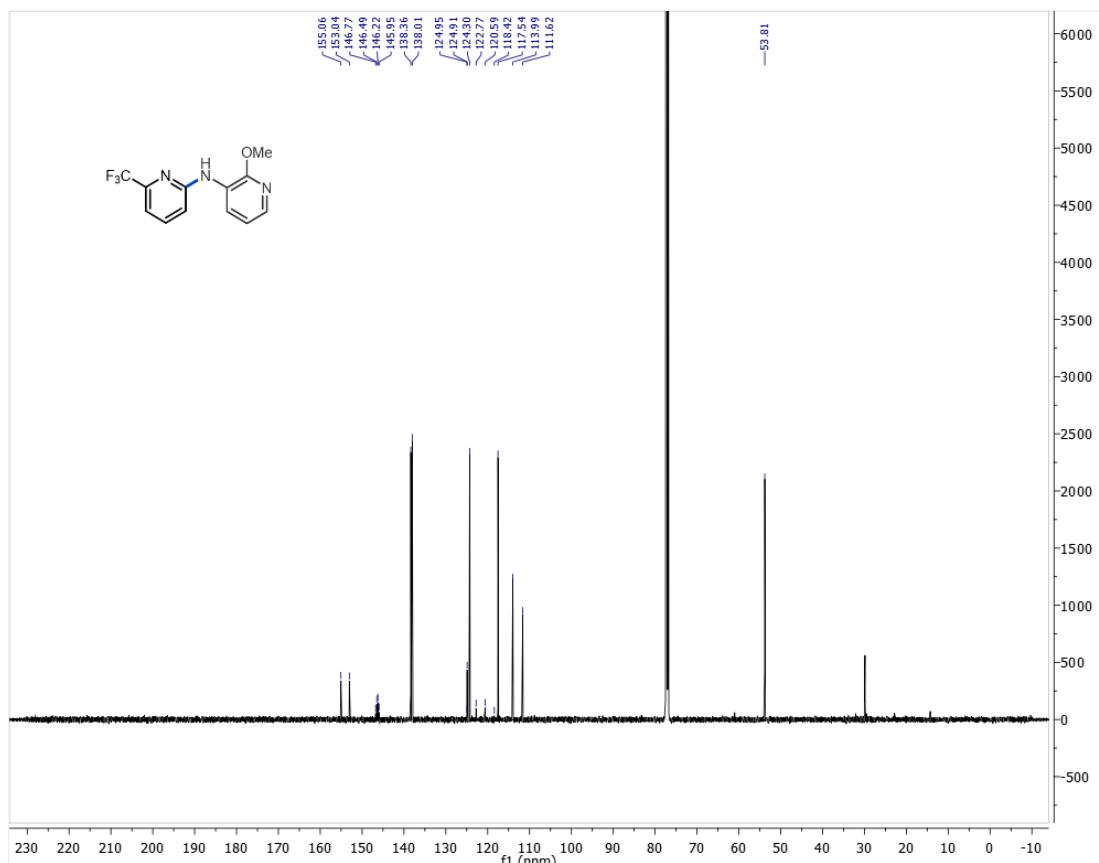

**Figure S67.** <sup>13</sup>C NMR (126 MHz, CDCl<sub>3</sub>) of 10.

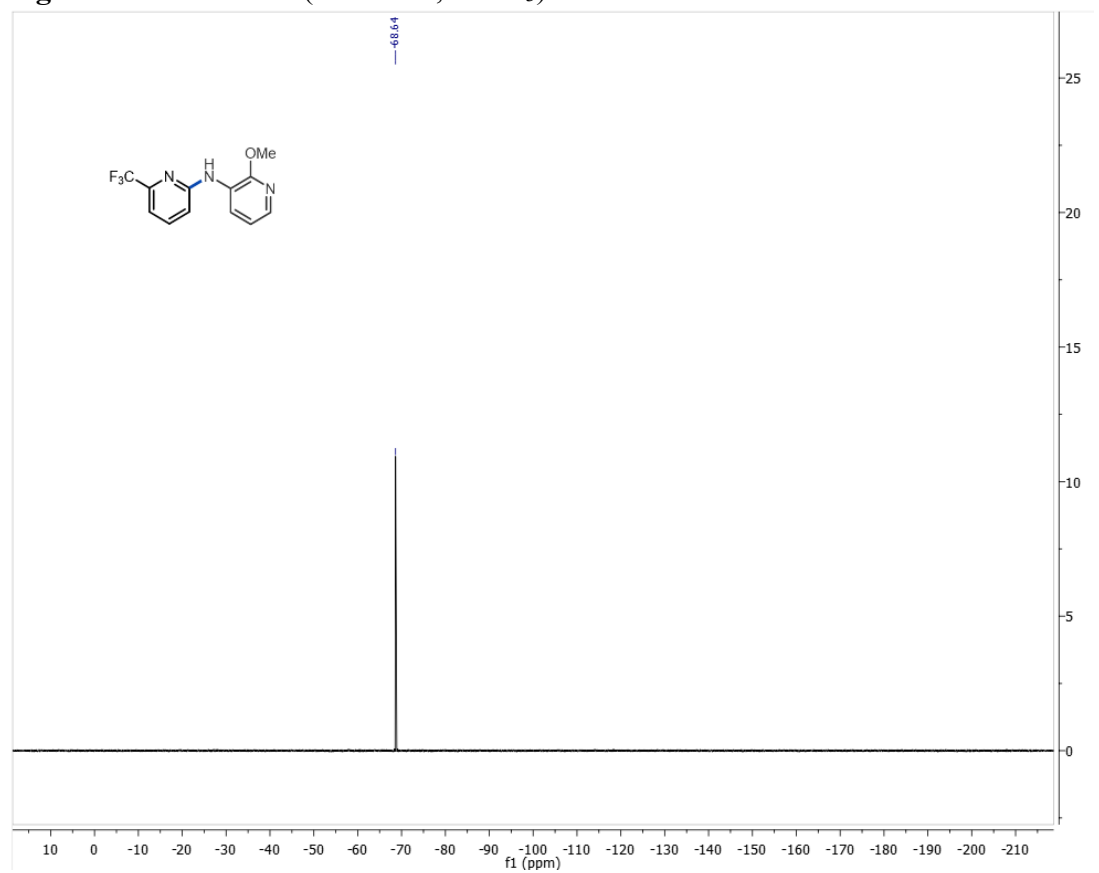

**Figure S68.** <sup>19</sup>F NMR (376 MHz, CDCl<sub>3</sub>) of 10.

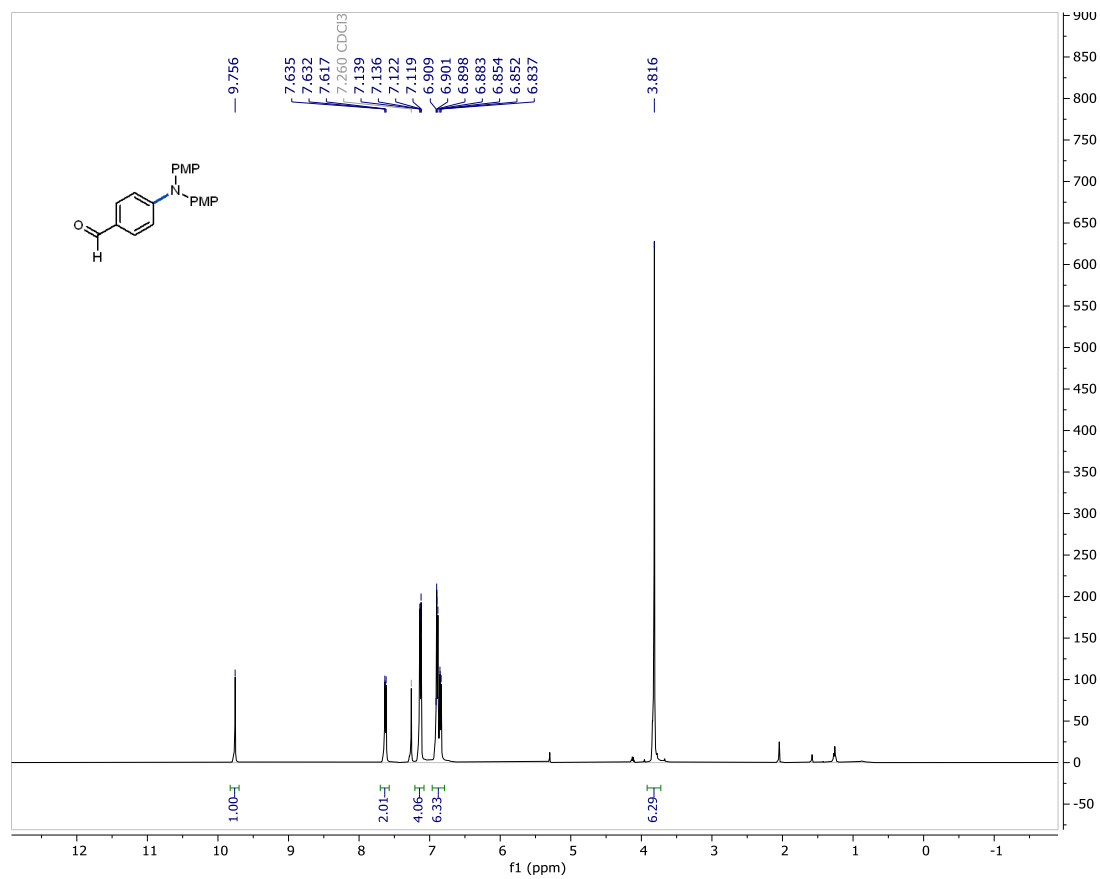

**Figure S69.**  $^1\text{H}$  NMR (500 MHz,  $\text{CDCl}_3$ ) of **11**.

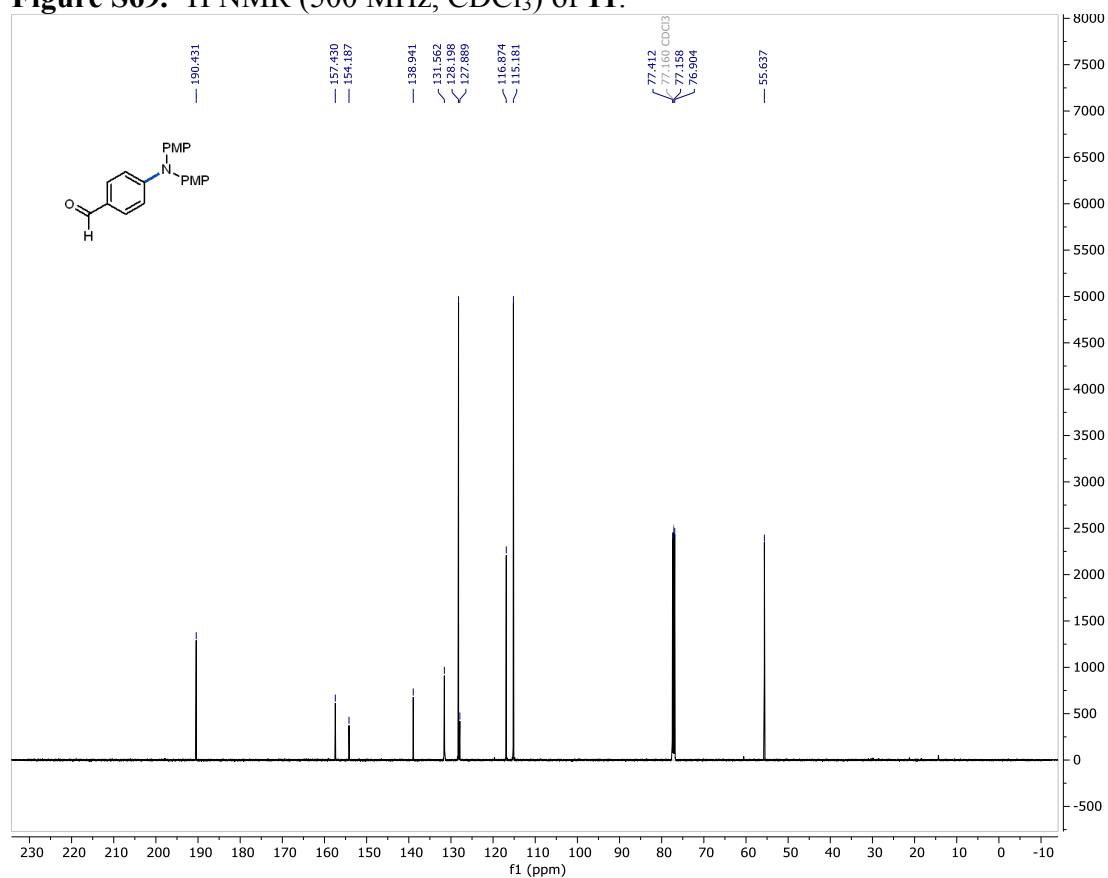

**Figure S70.**  $^{13}\text{C}$  NMR (126 MHz,  $\text{CDCl}_3$ ) of **11**.

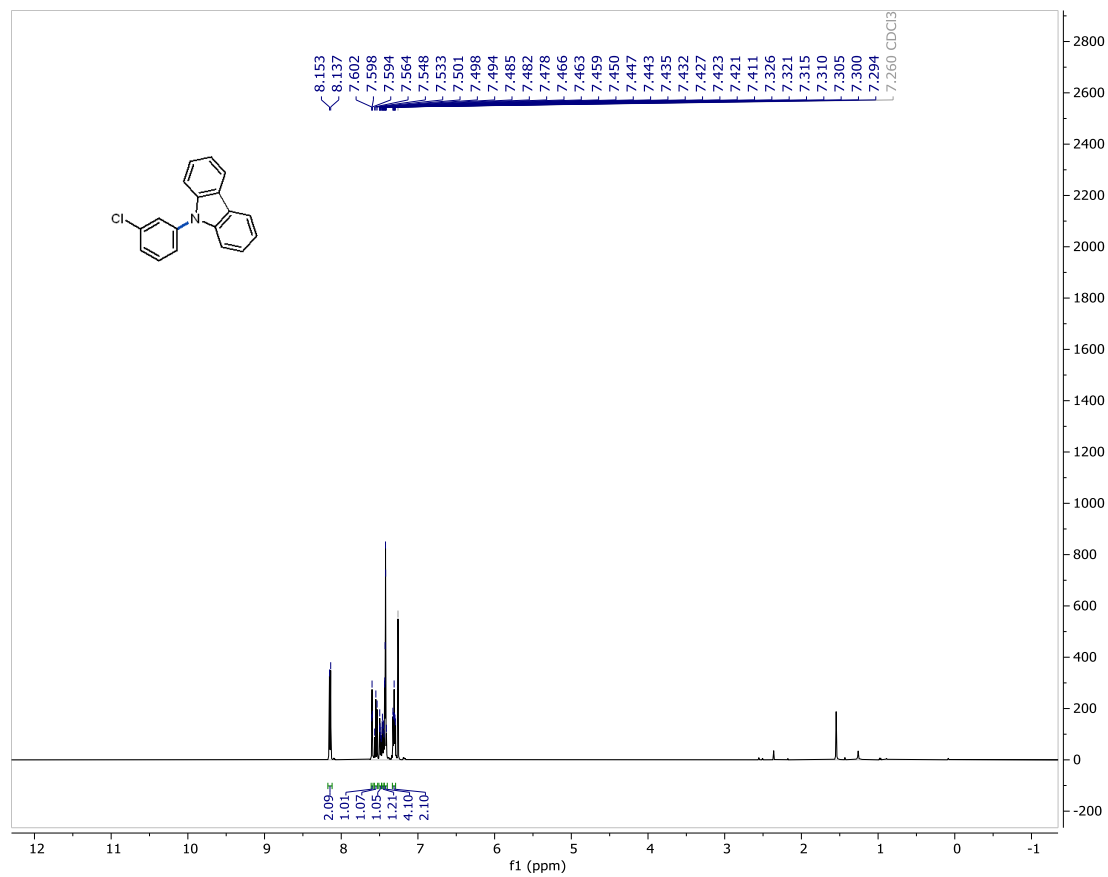

**Figure S71.** <sup>1</sup>H NMR (500 MHz, CDCl<sub>3</sub>) of 12.

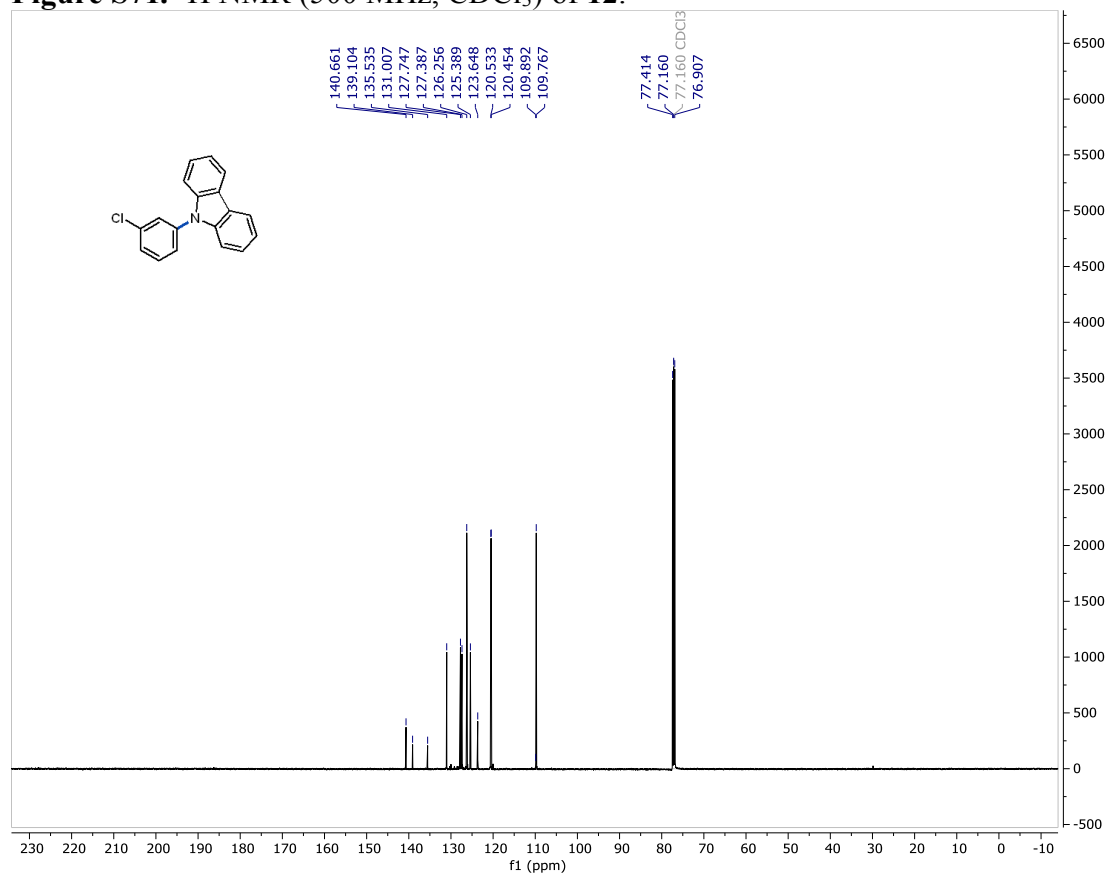

**Figure S72.** <sup>13</sup>C NMR (126 MHz, CDCl<sub>3</sub>) of 12.



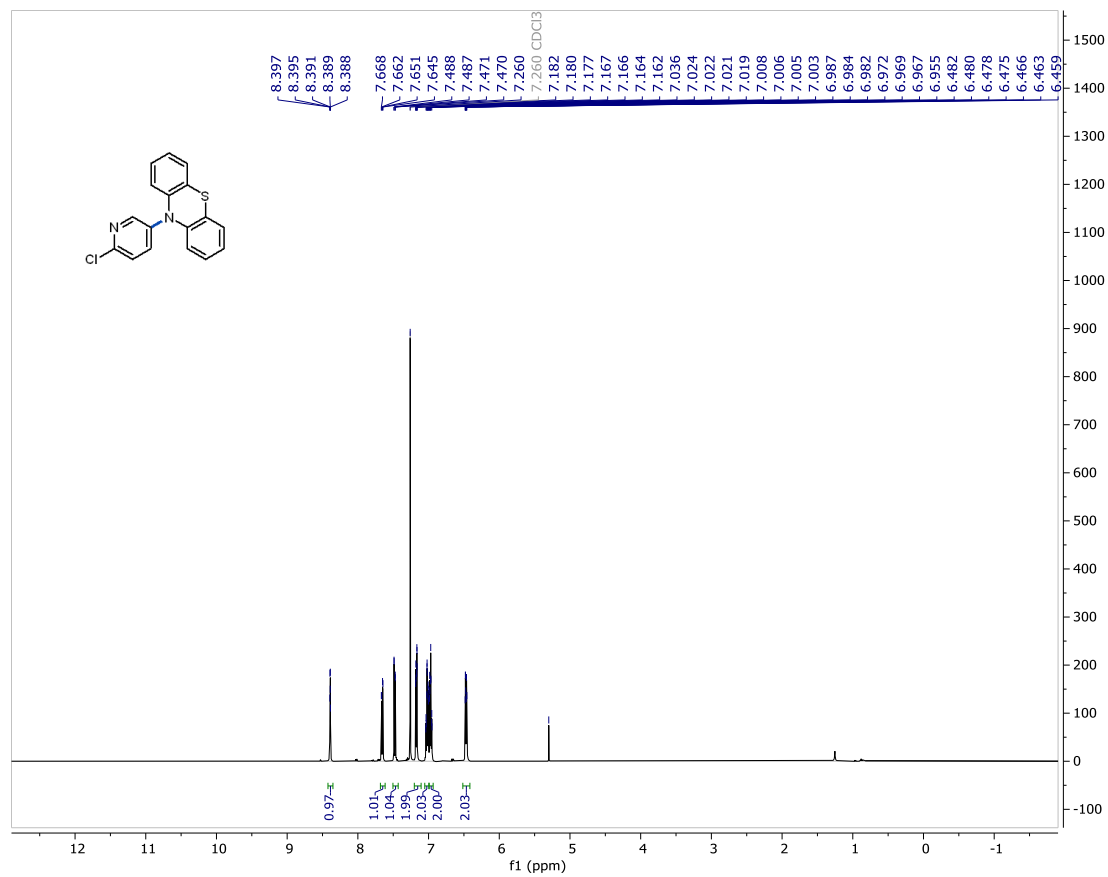

Figure S73.  $^1\text{H}$  NMR (500 MHz,  $\text{CDCl}_3$ ) of 13.

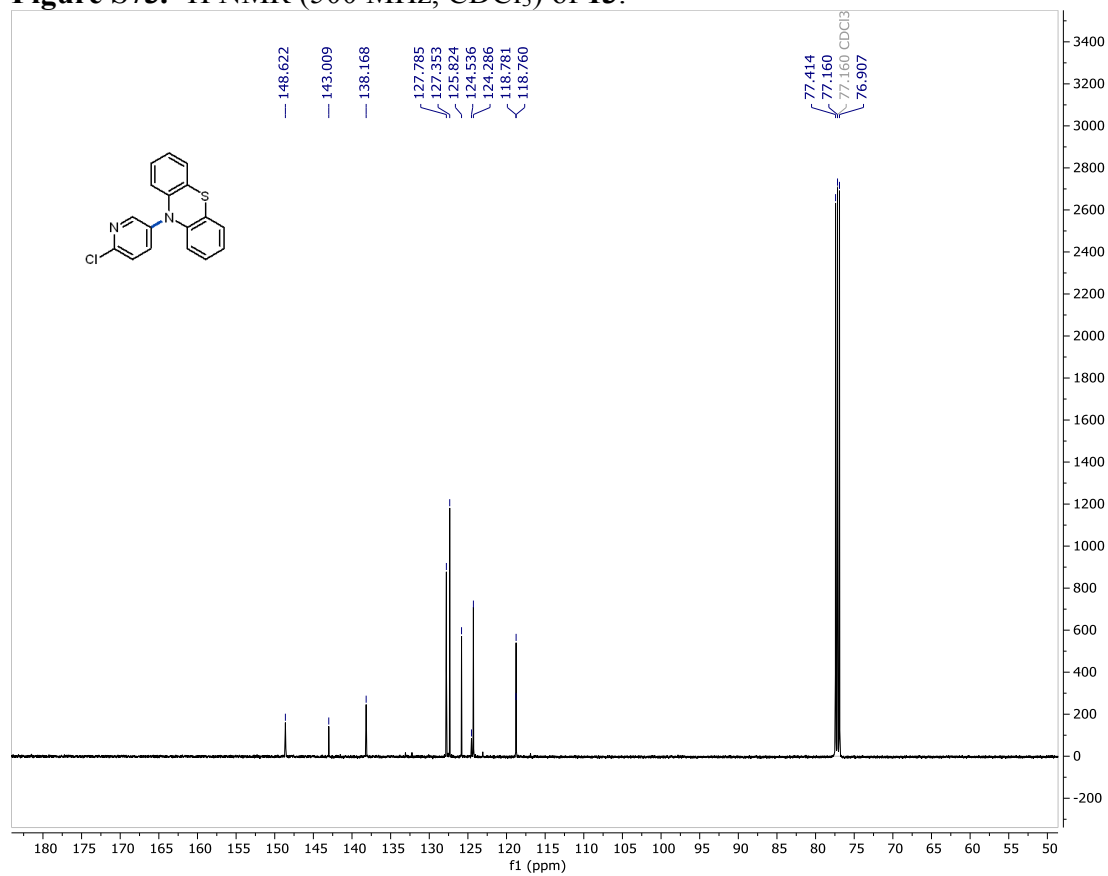

Figure S74.  $^{13}\text{C}$  NMR (126 MHz,  $\text{CDCl}_3$ ) of 13.

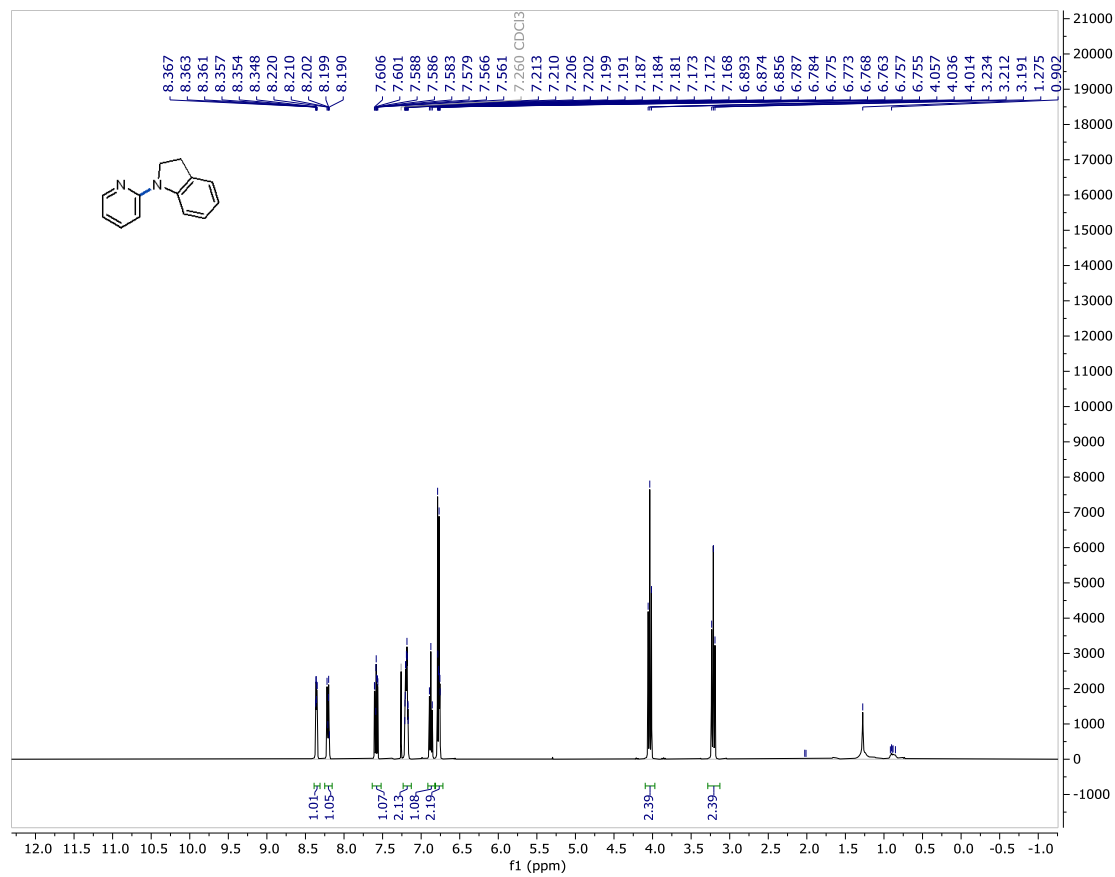

Figure S75. <sup>1</sup>H NMR (500 MHz, CDCl<sub>3</sub>) of 14.

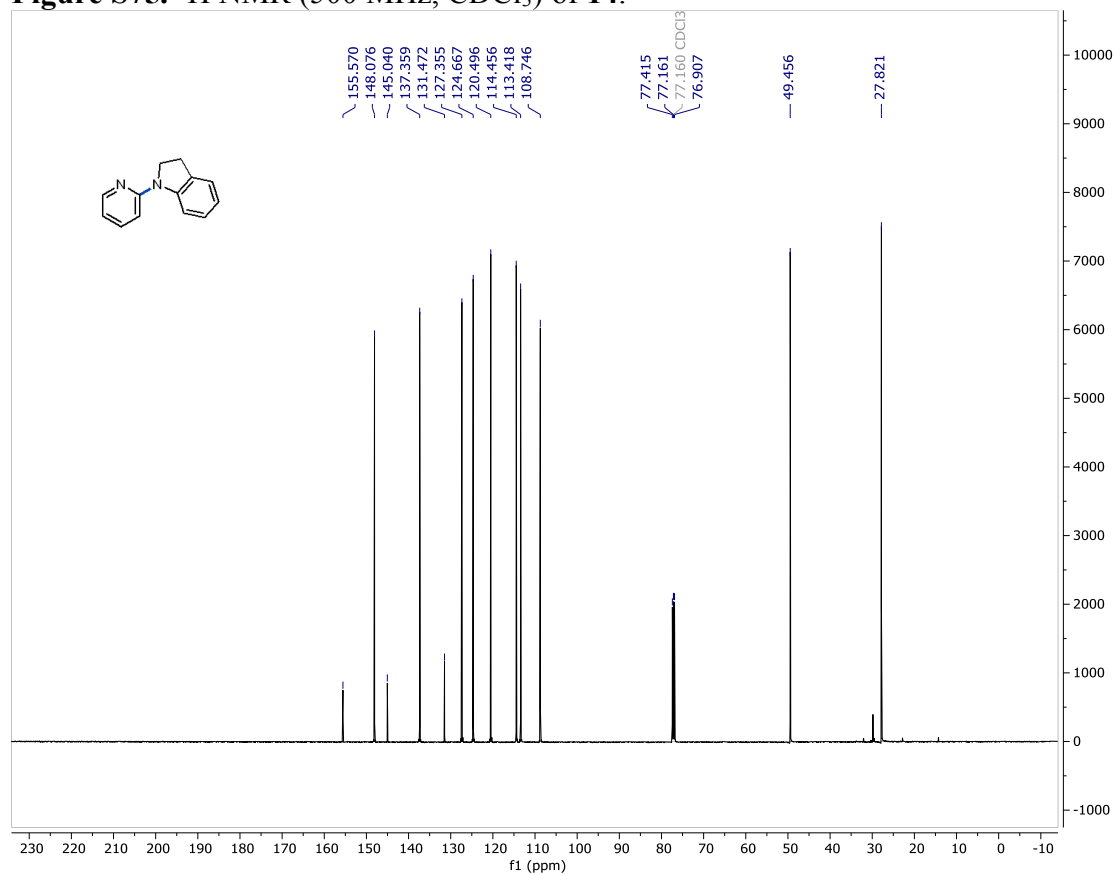

Figure S76. <sup>13</sup>C NMR (126 MHz, CDCl<sub>3</sub>) of 14.

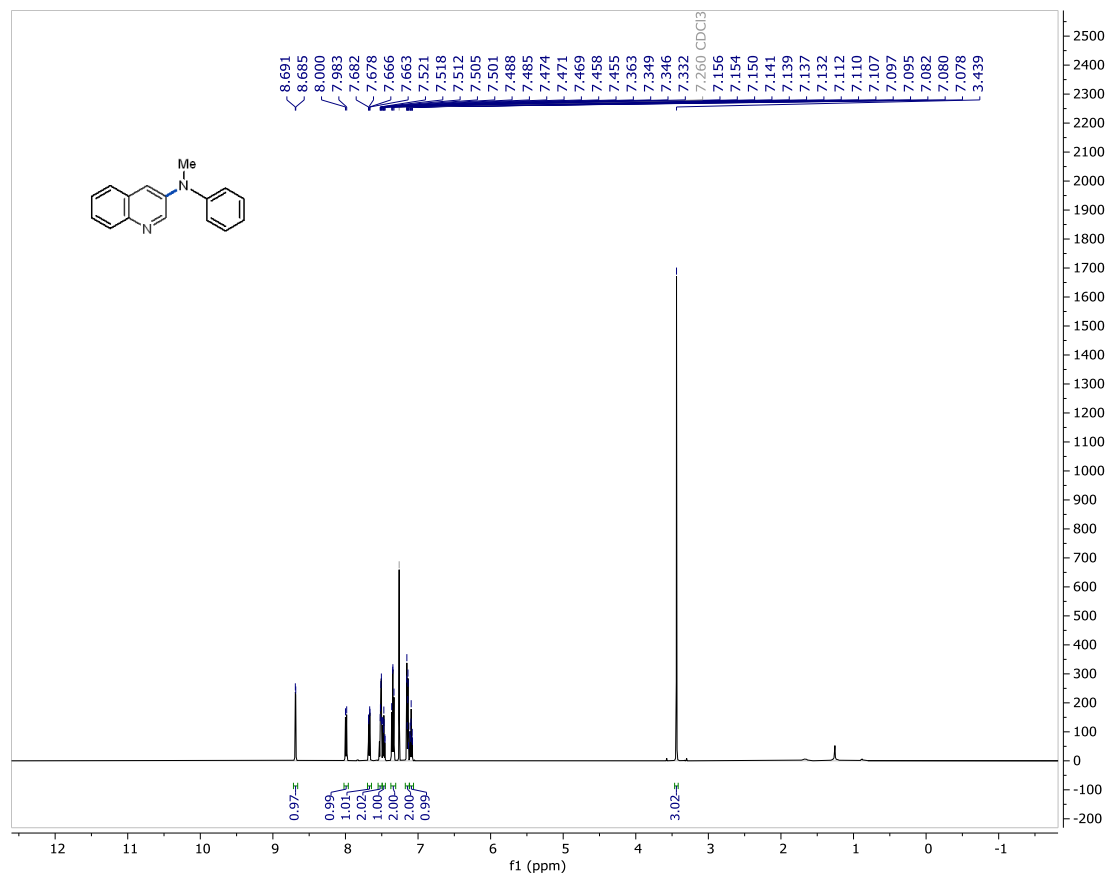

Figure S77. <sup>1</sup>H NMR (500 MHz, CDCl<sub>3</sub>) of 15.

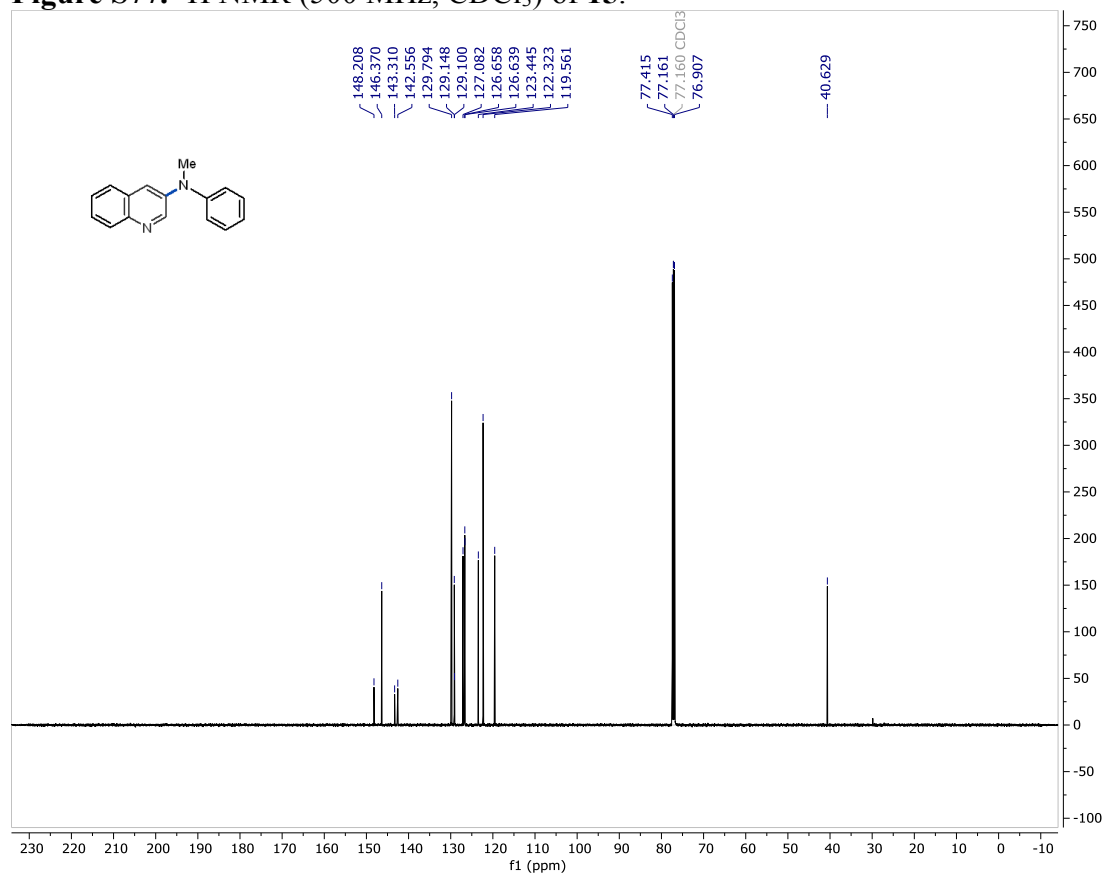

Figure S78. <sup>13</sup>C NMR (126 MHz, CDCl<sub>3</sub>) of 15.

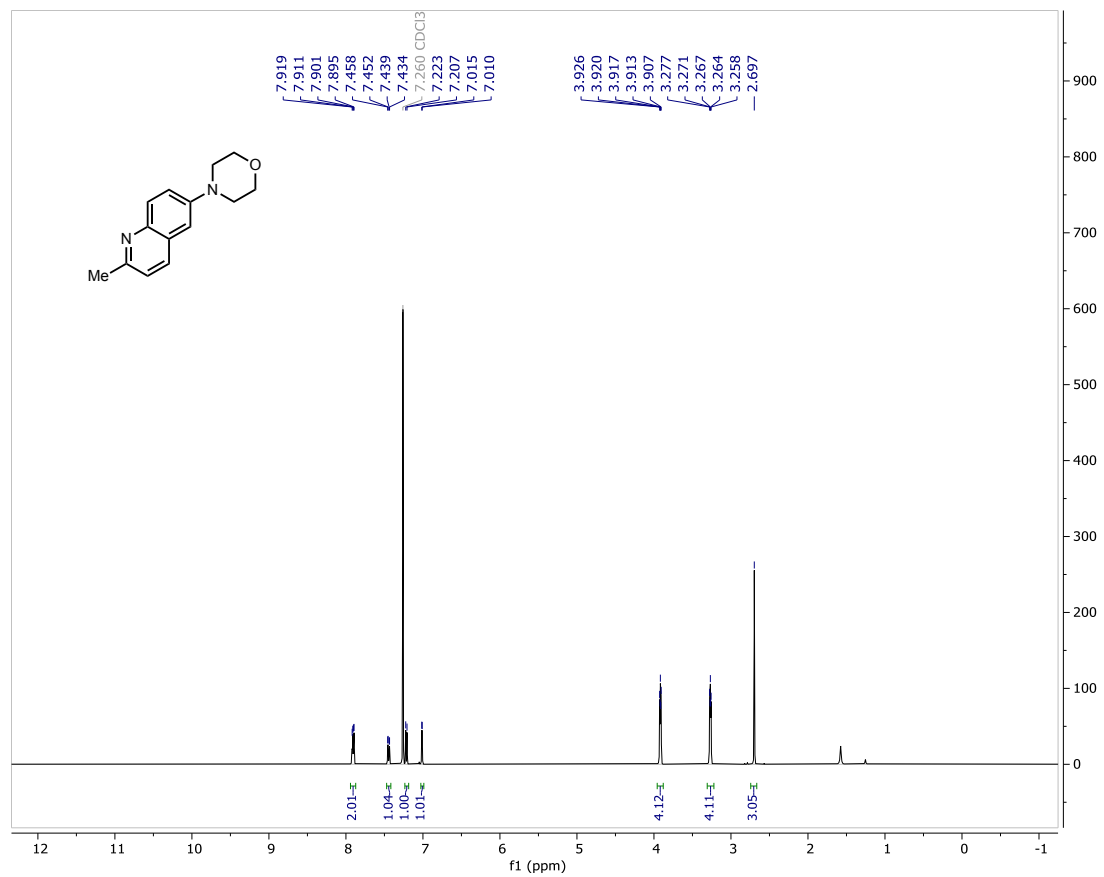

**Figure S79.** <sup>1</sup>H NMR (500 MHz, CDCl<sub>3</sub>) of 16.

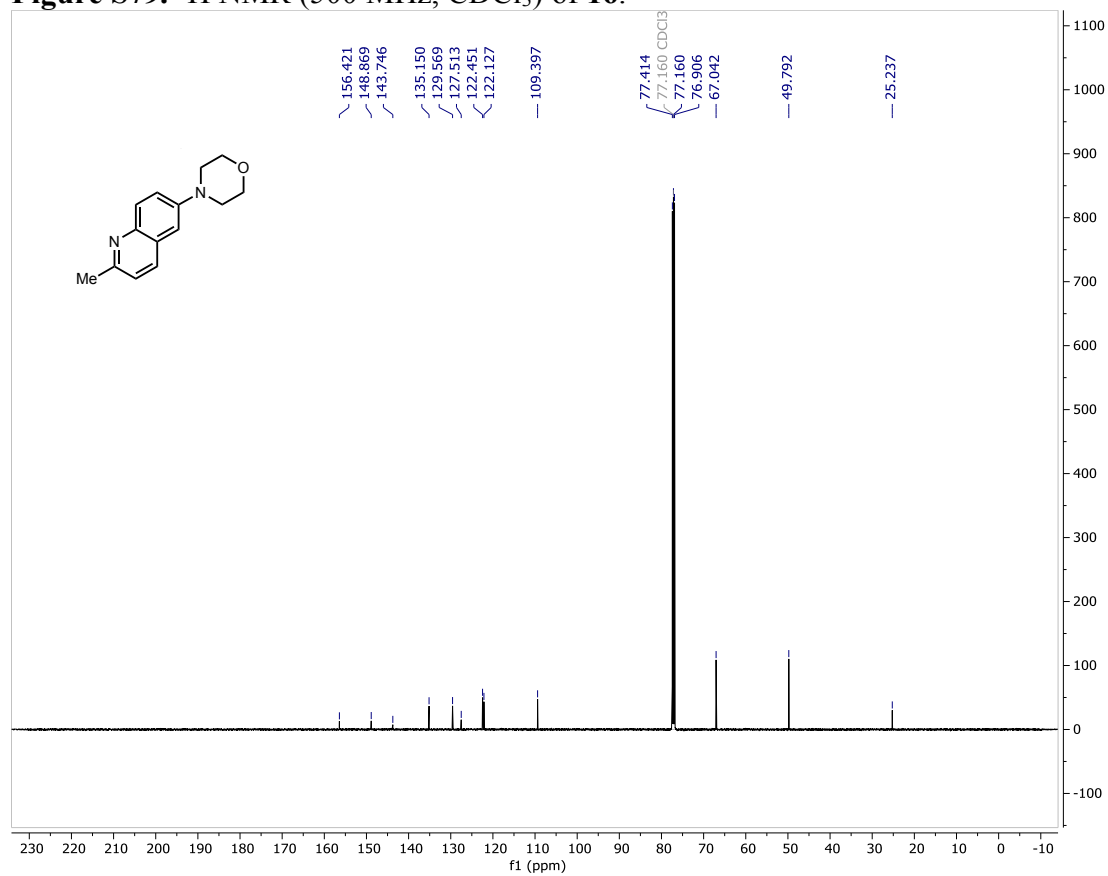

**Figure S80.** <sup>13</sup>C NMR (126 MHz, CDCl<sub>3</sub>) of 16.

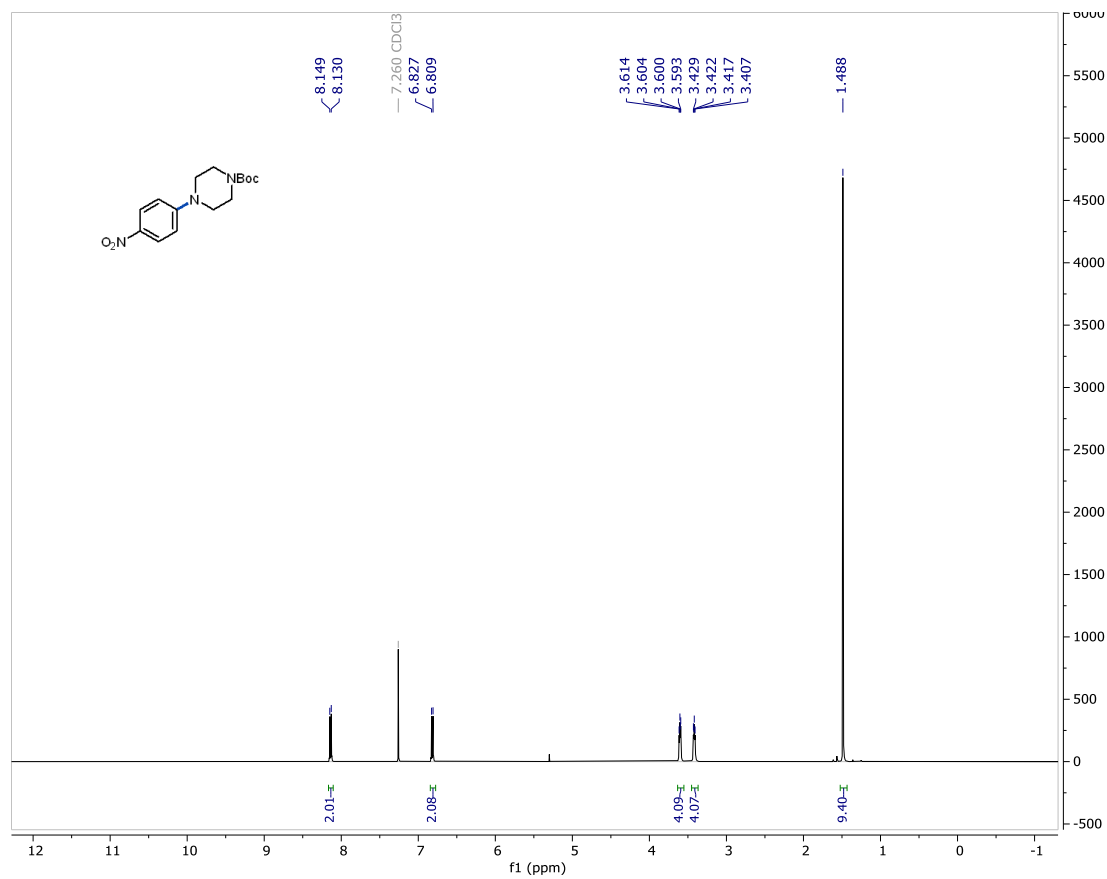

**Figure S81.** <sup>1</sup>H NMR (500 MHz, CDCl<sub>3</sub>) of 17.

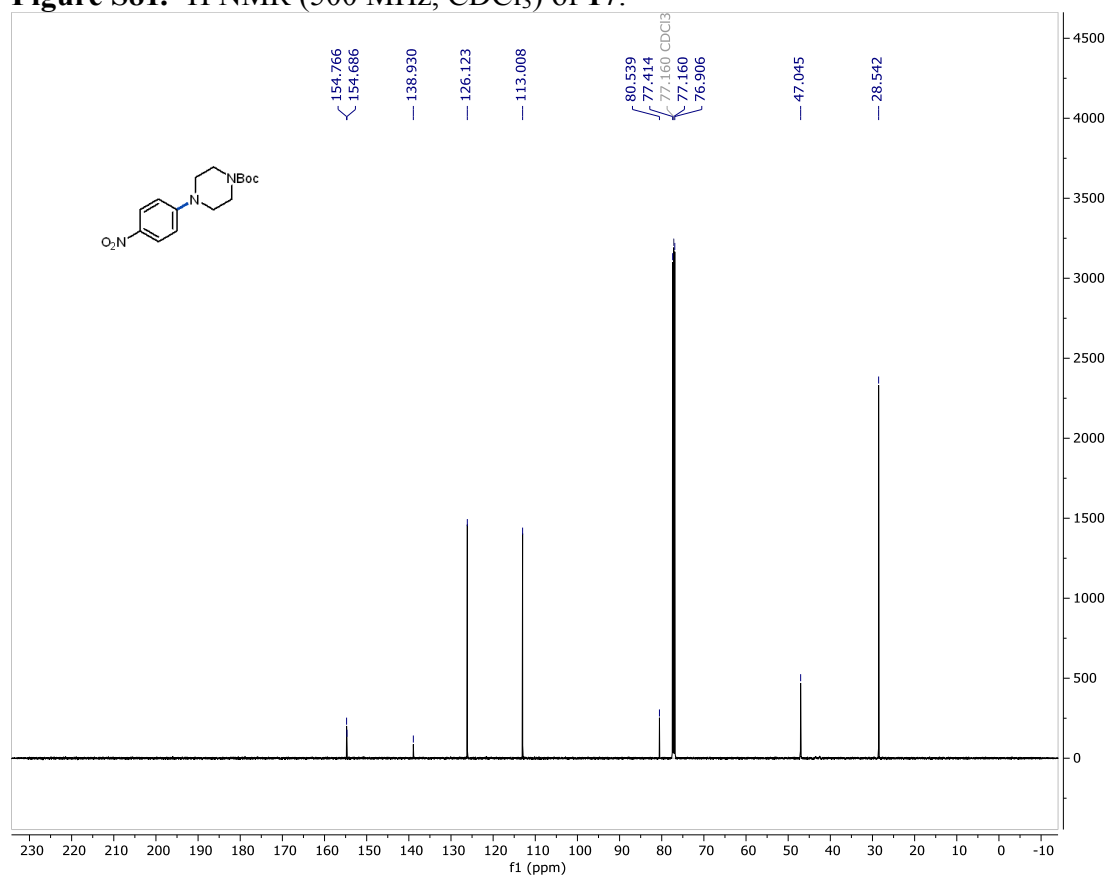

**Figure S82.** <sup>13</sup>C NMR (126 MHz, CDCl<sub>3</sub>) of 17.

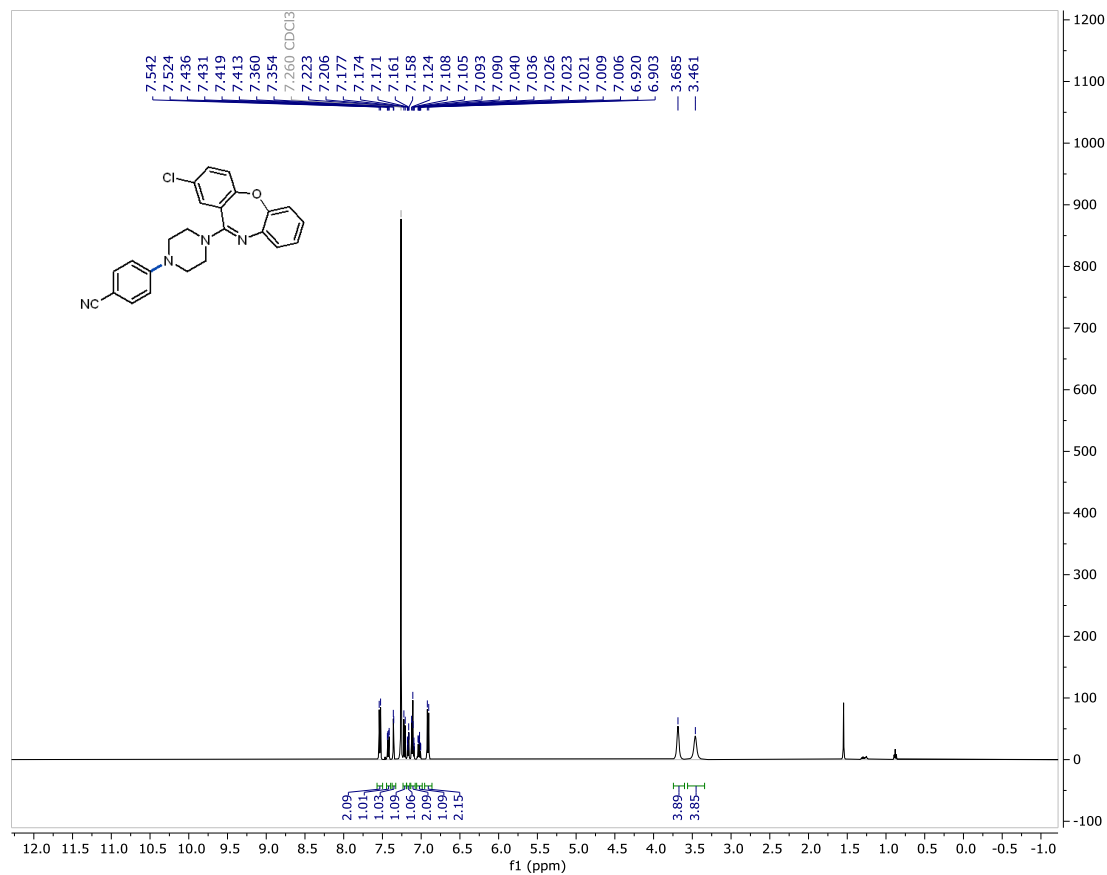

Figure S83. <sup>1</sup>H NMR (500 MHz, CDCl<sub>3</sub>) of 18.

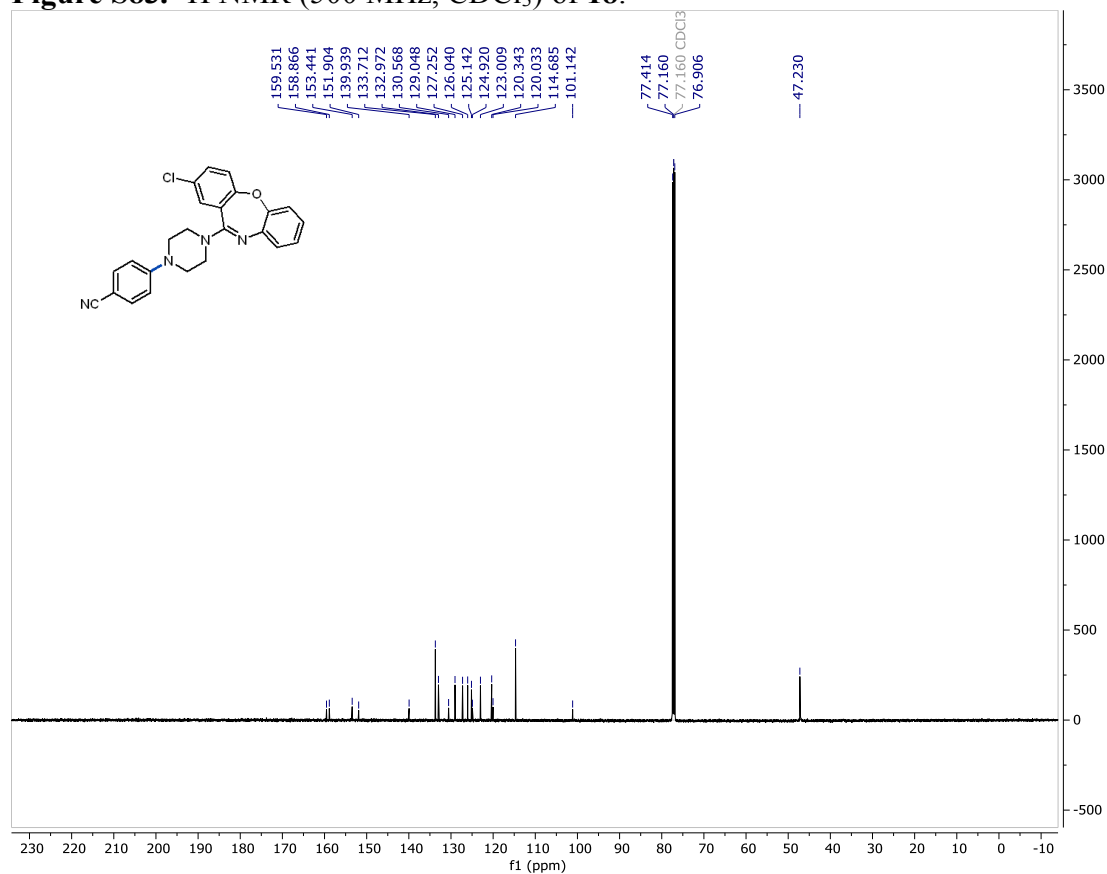

Figure S84. <sup>13</sup>C NMR (126 MHz, CDCl<sub>3</sub>) of 18.

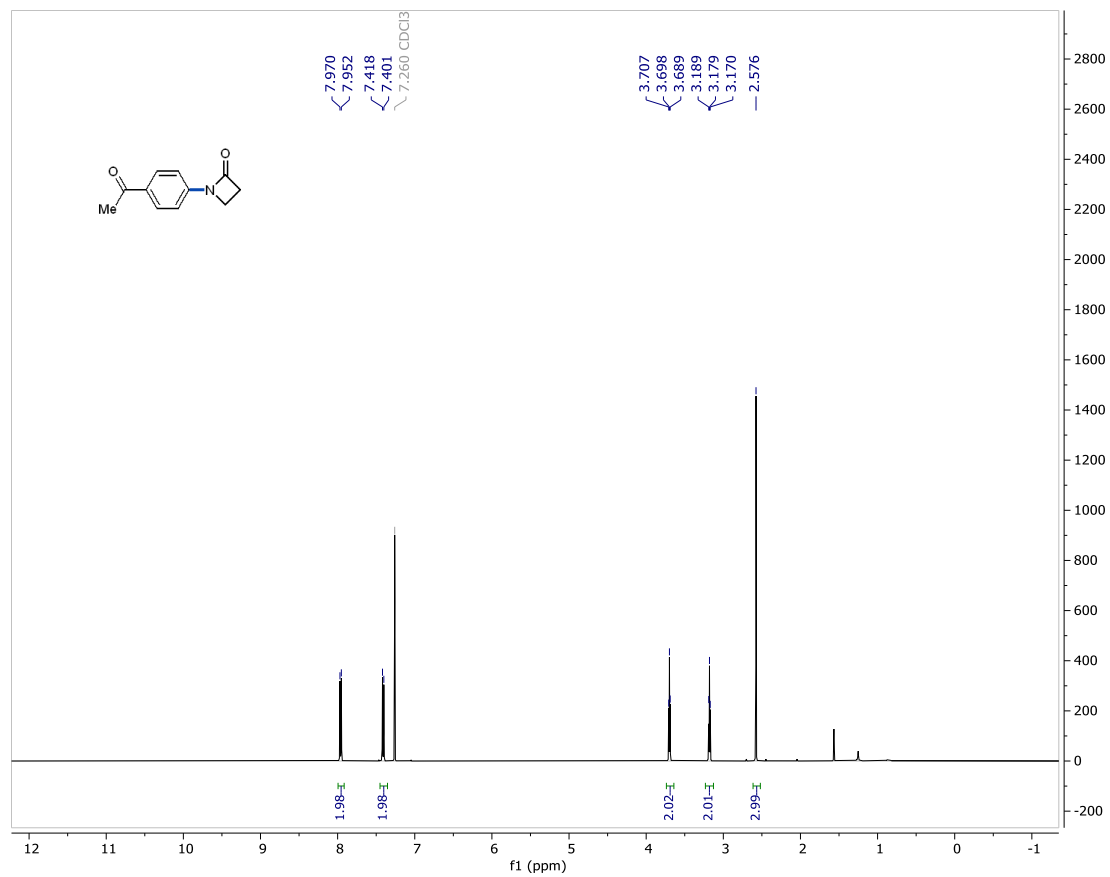

**Figure S85.** <sup>1</sup>H NMR (500 MHz, CDCl<sub>3</sub>) of **19**.

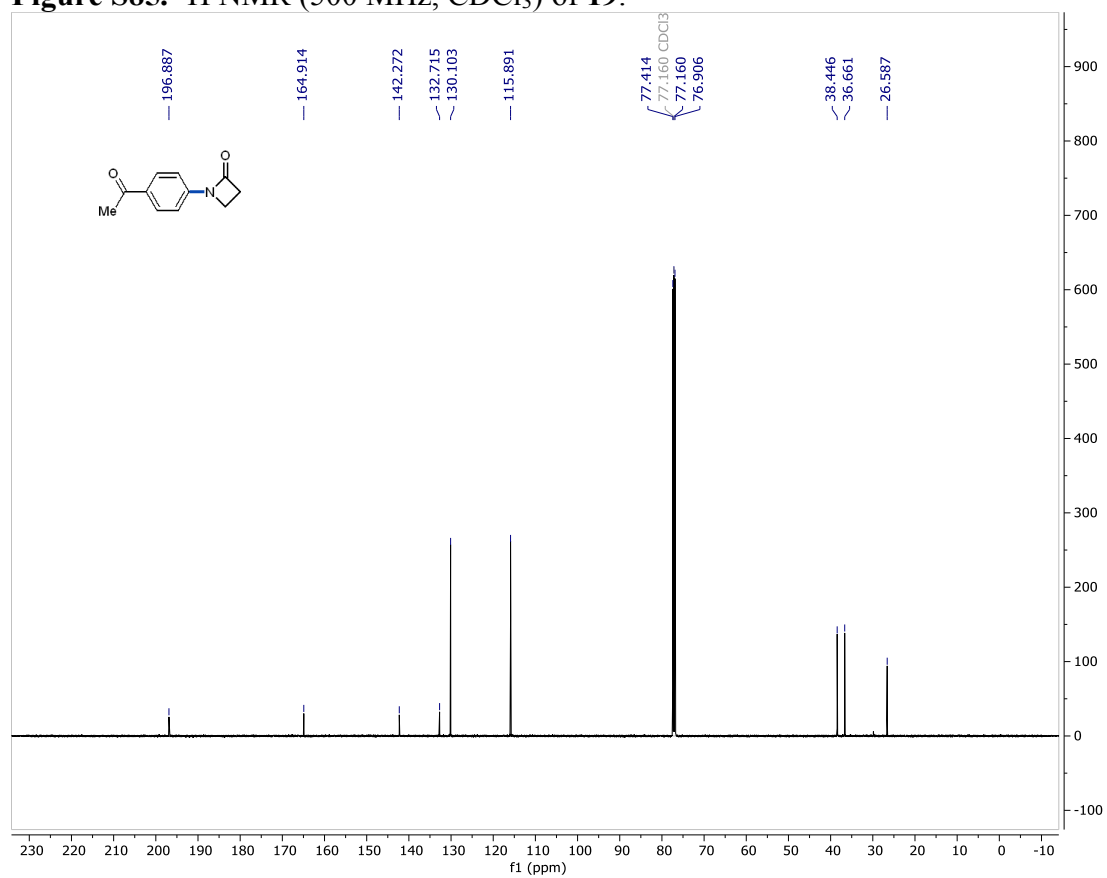

**Figure S86.** <sup>13</sup>C NMR (126 MHz, CDCl<sub>3</sub>) of **19**.

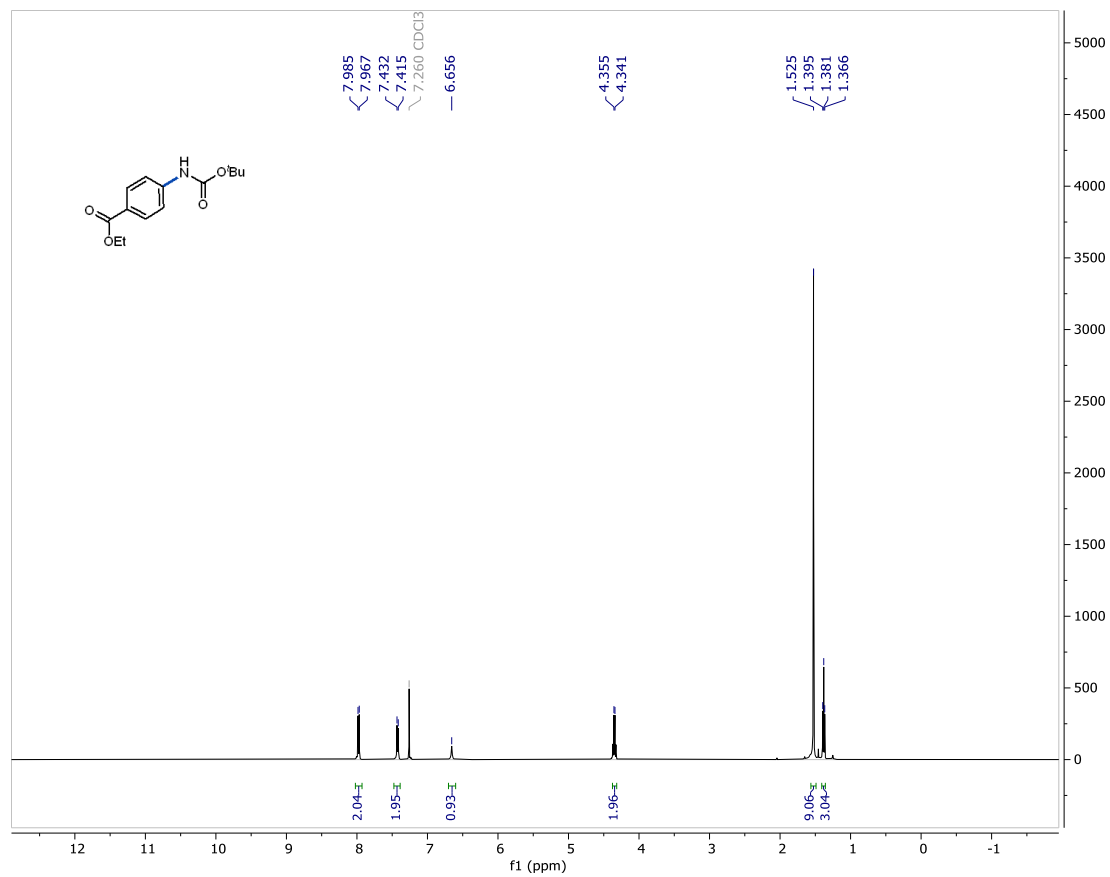

Figure S87. <sup>1</sup>H NMR (500 MHz, CDCl<sub>3</sub>) of **20**.

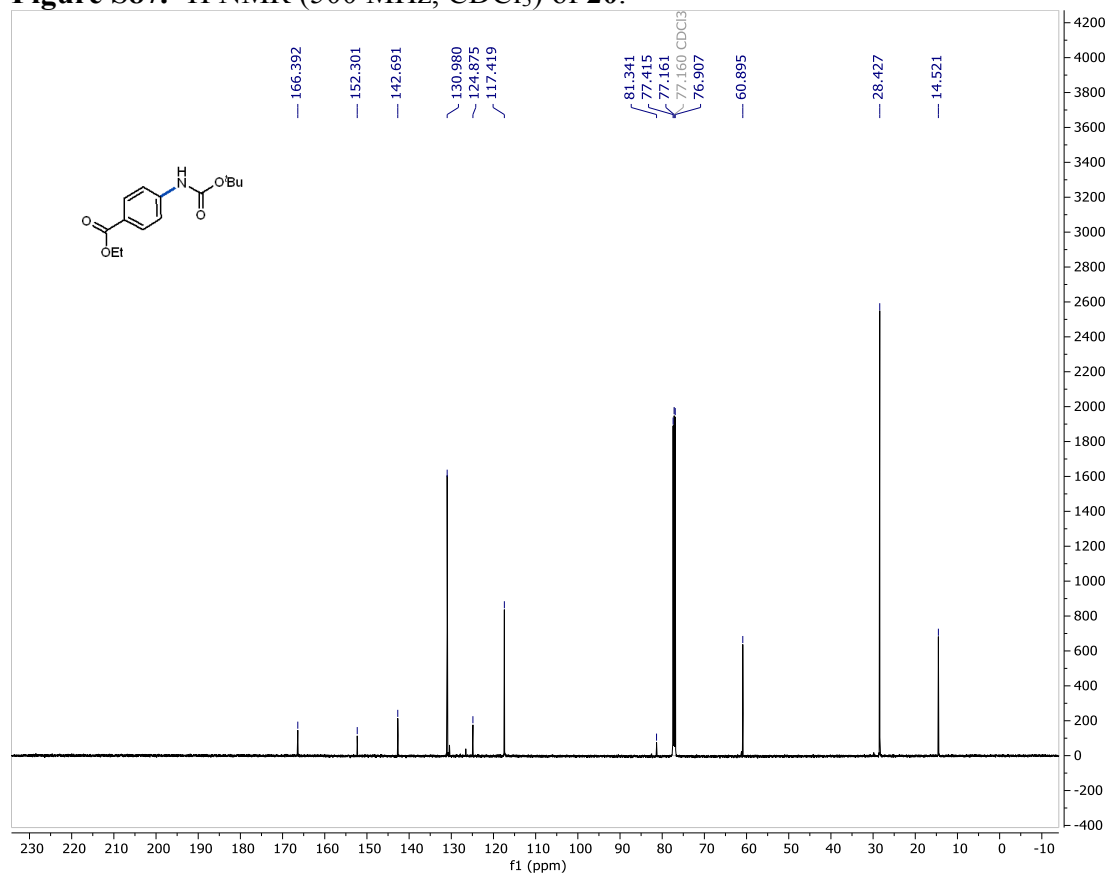

Figure S88. <sup>13</sup>C NMR (126 MHz, CDCl<sub>3</sub>) of **20**.



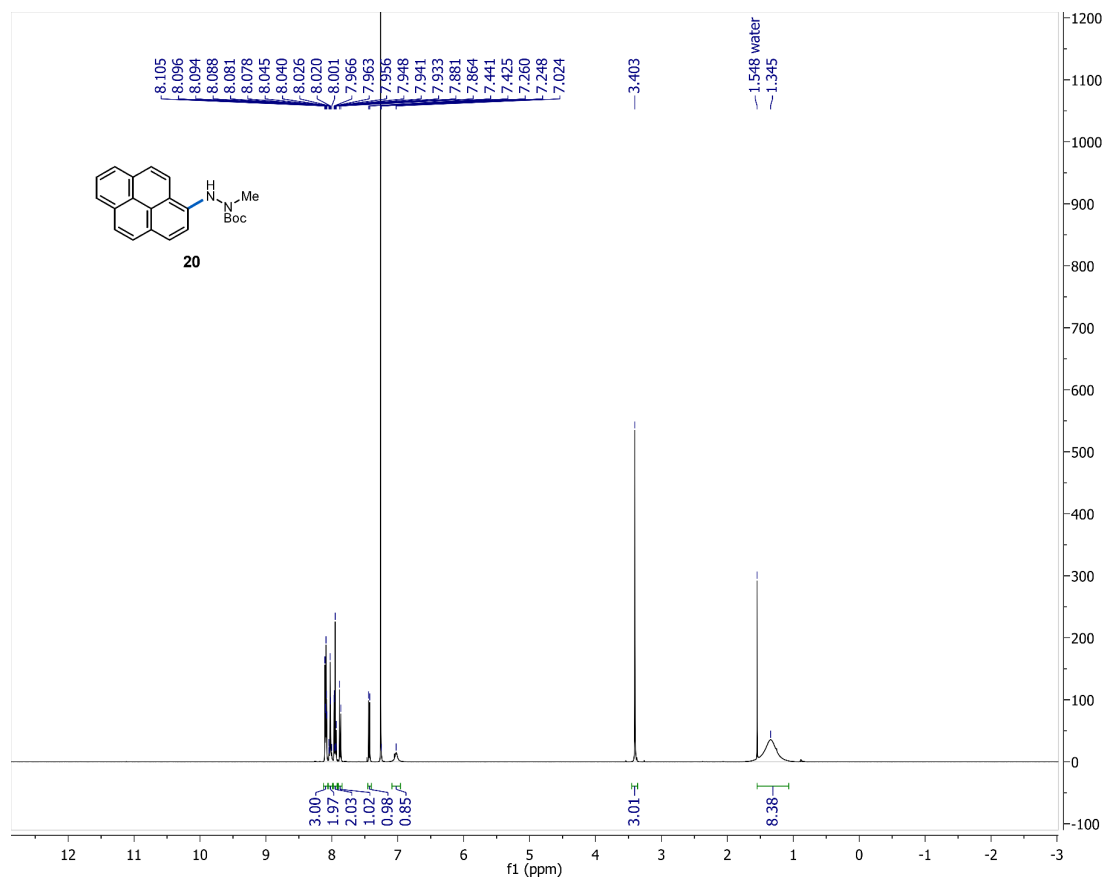

**Figure S89.**  $^1\text{H}$  NMR (500 MHz,  $\text{CDCl}_3$ ) of **21**.

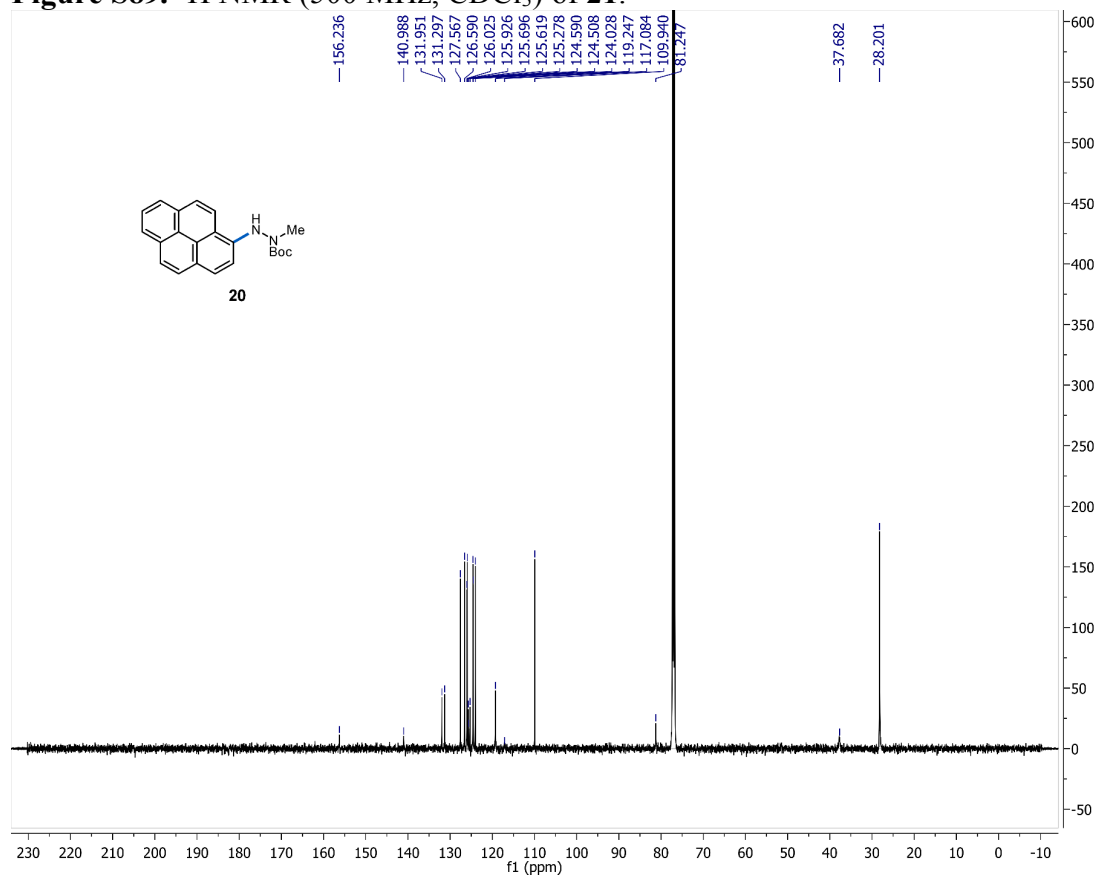

**Figure S90.**  $^{13}\text{C}$  NMR (126 MHz,  $\text{CDCl}_3$ ) of **21**.

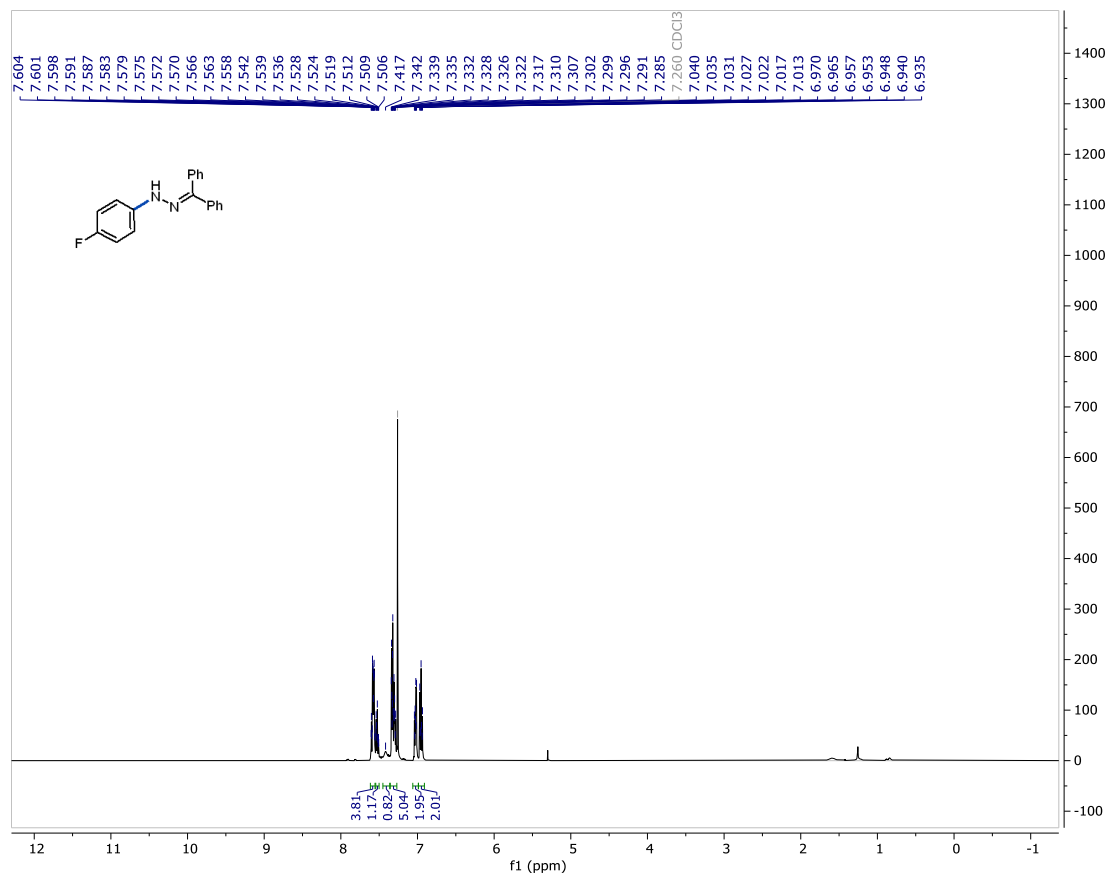

Figure S91. <sup>1</sup>H NMR (500 MHz, CDCl<sub>3</sub>) of 22.

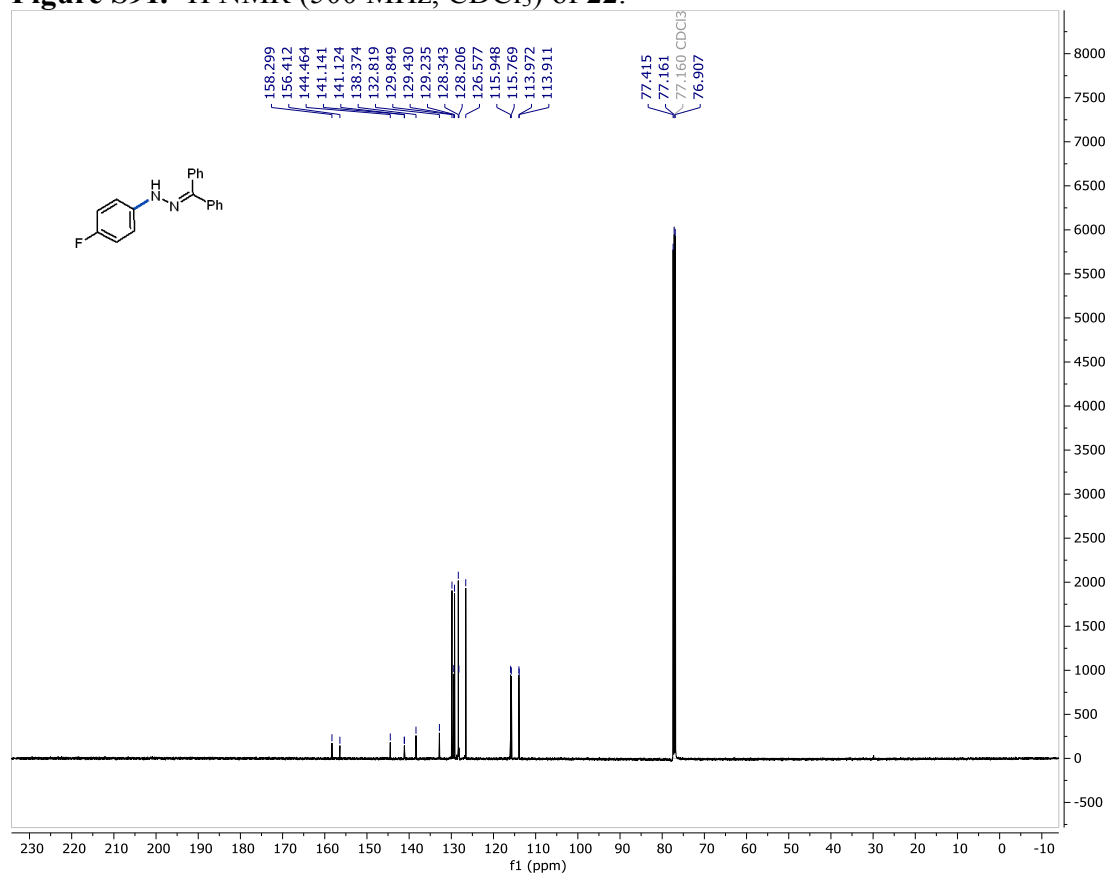

Figure S92. <sup>13</sup>C NMR (126 MHz, CDCl<sub>3</sub>) of 22.

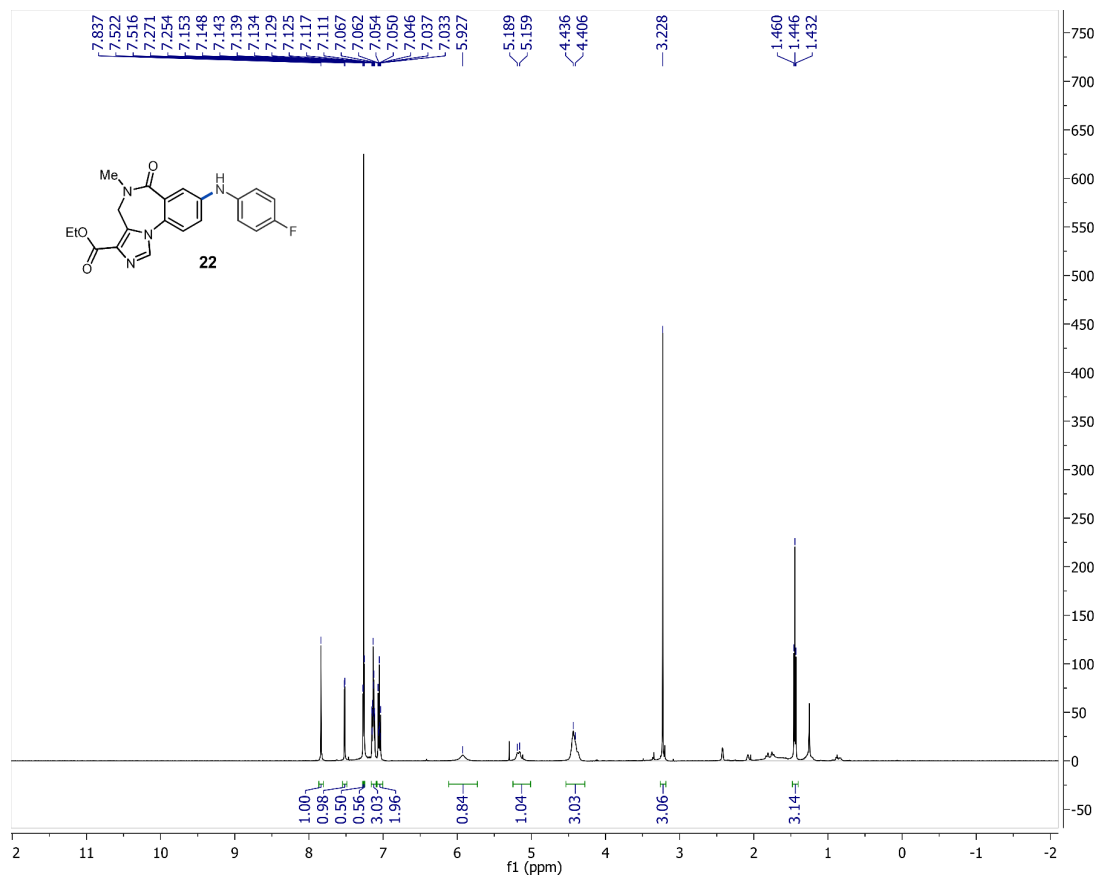

**Figure S93.** <sup>1</sup>H NMR (500 MHz, CDCl<sub>3</sub>) of **23**.

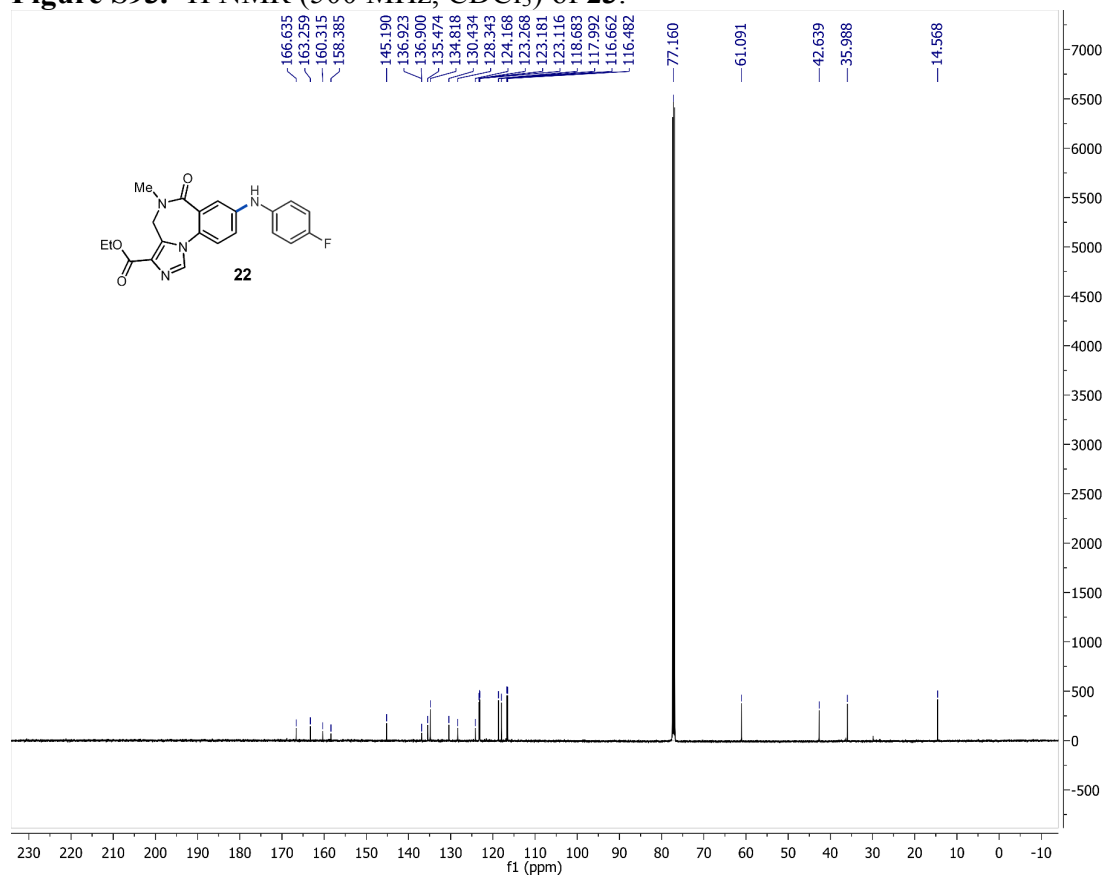

**Figure S94.** <sup>13</sup>C NMR (126 MHz, CDCl<sub>3</sub>) of **23**.

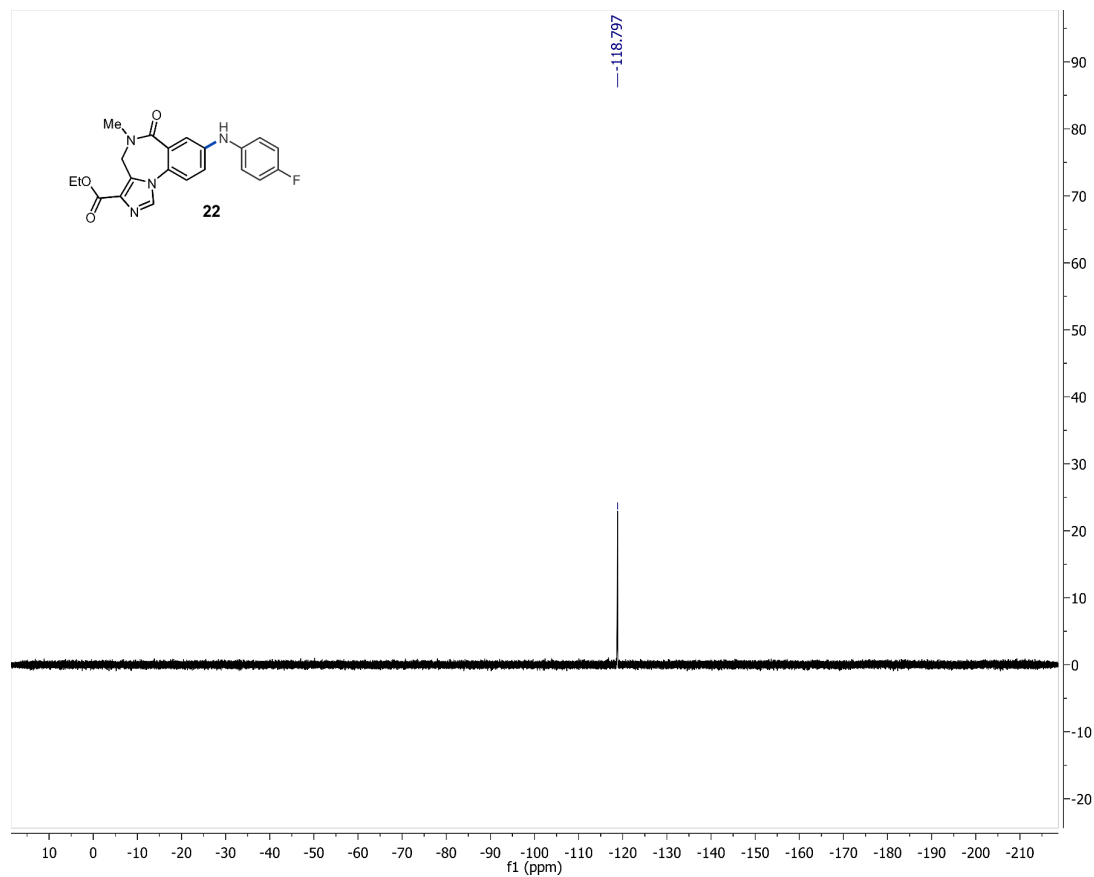

**Figure S95.**  $^{19}\text{F}$  NMR (376 MHz,  $\text{CDCl}_3$ ) of **23**.

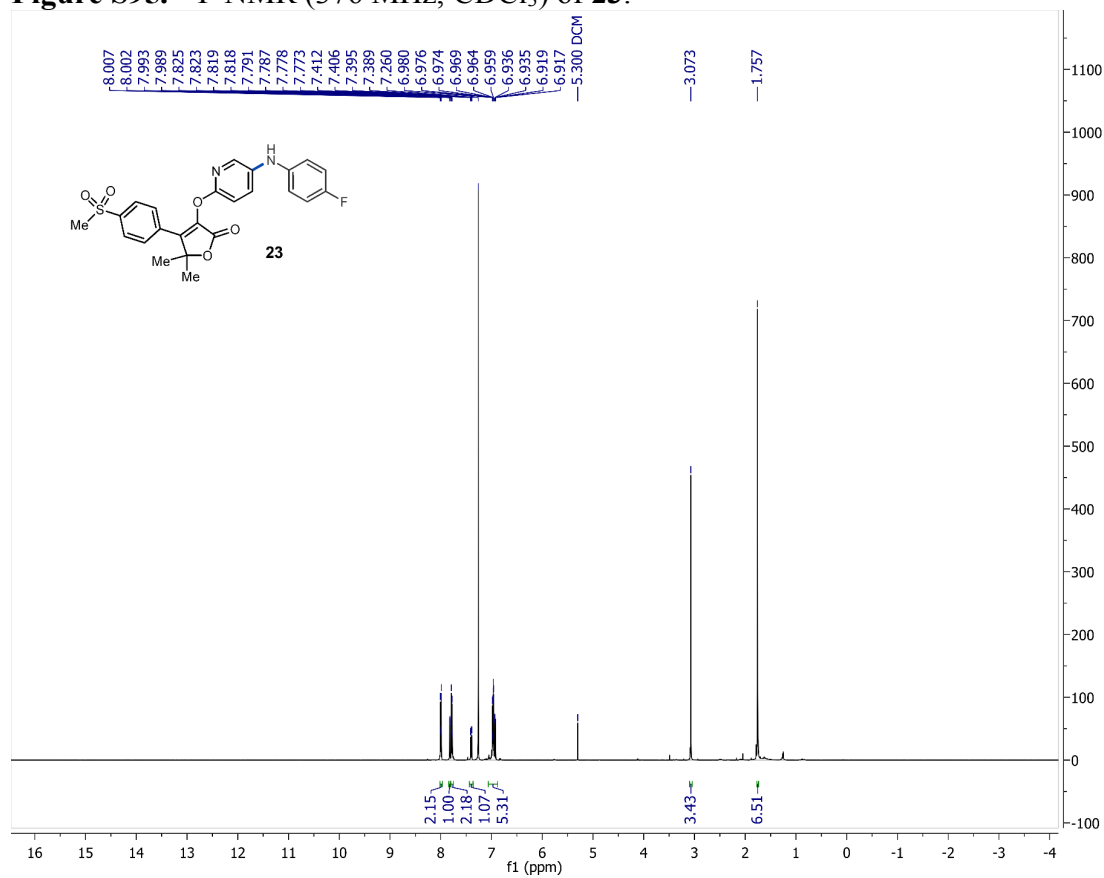

**Figure S96.**  $^1\text{H}$  NMR (500 MHz,  $\text{CDCl}_3$ ) of **24**.

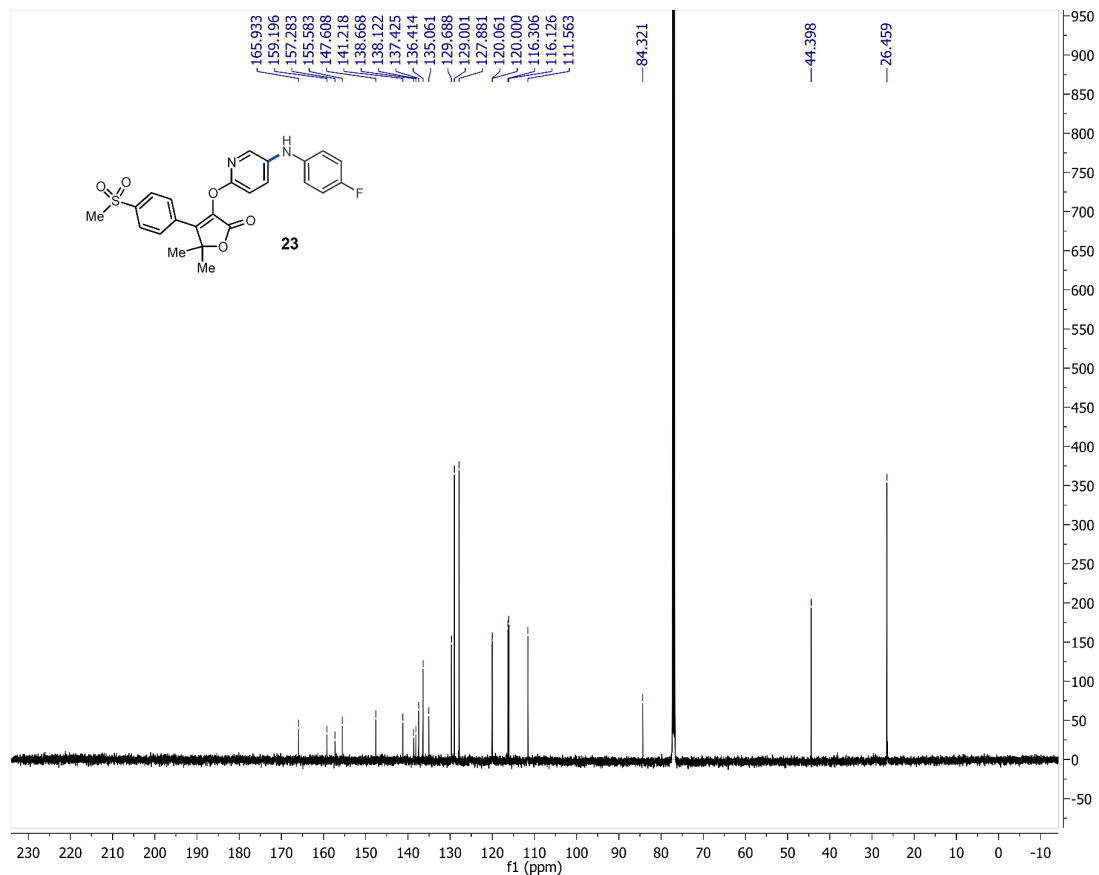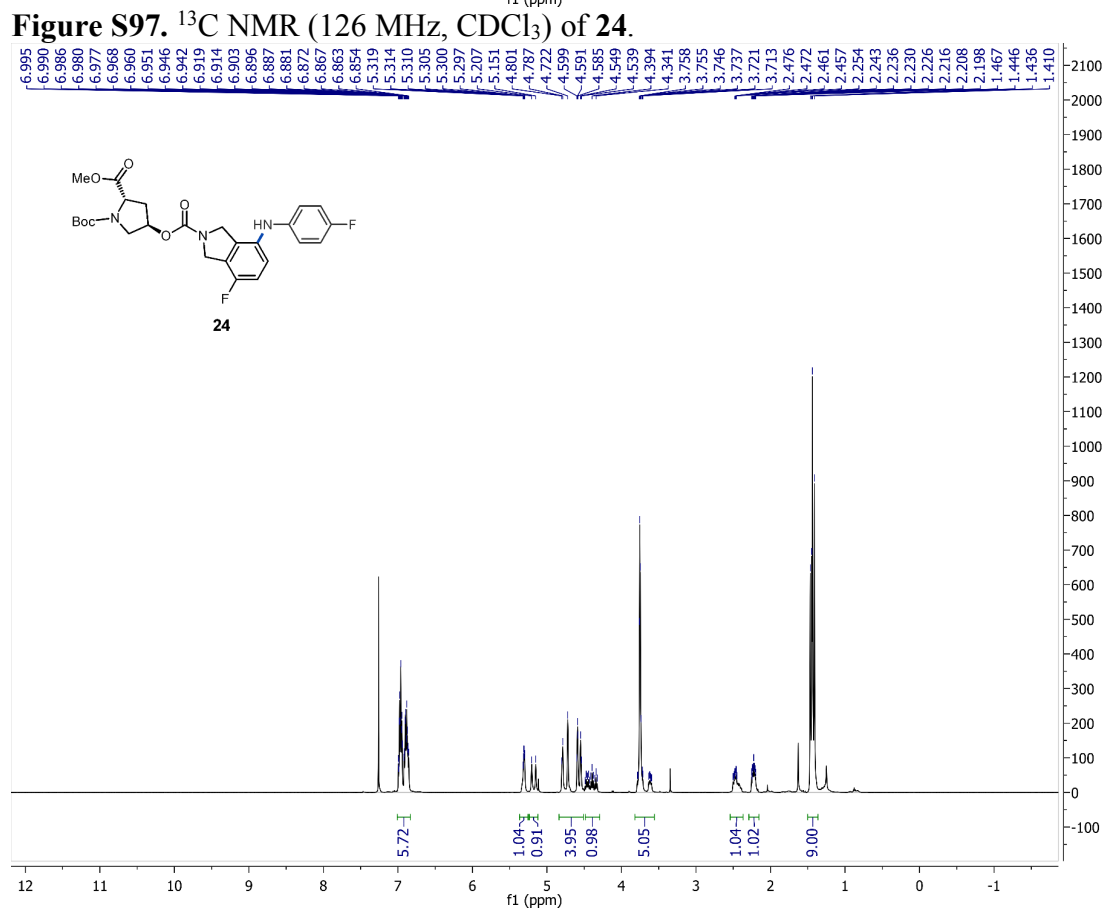

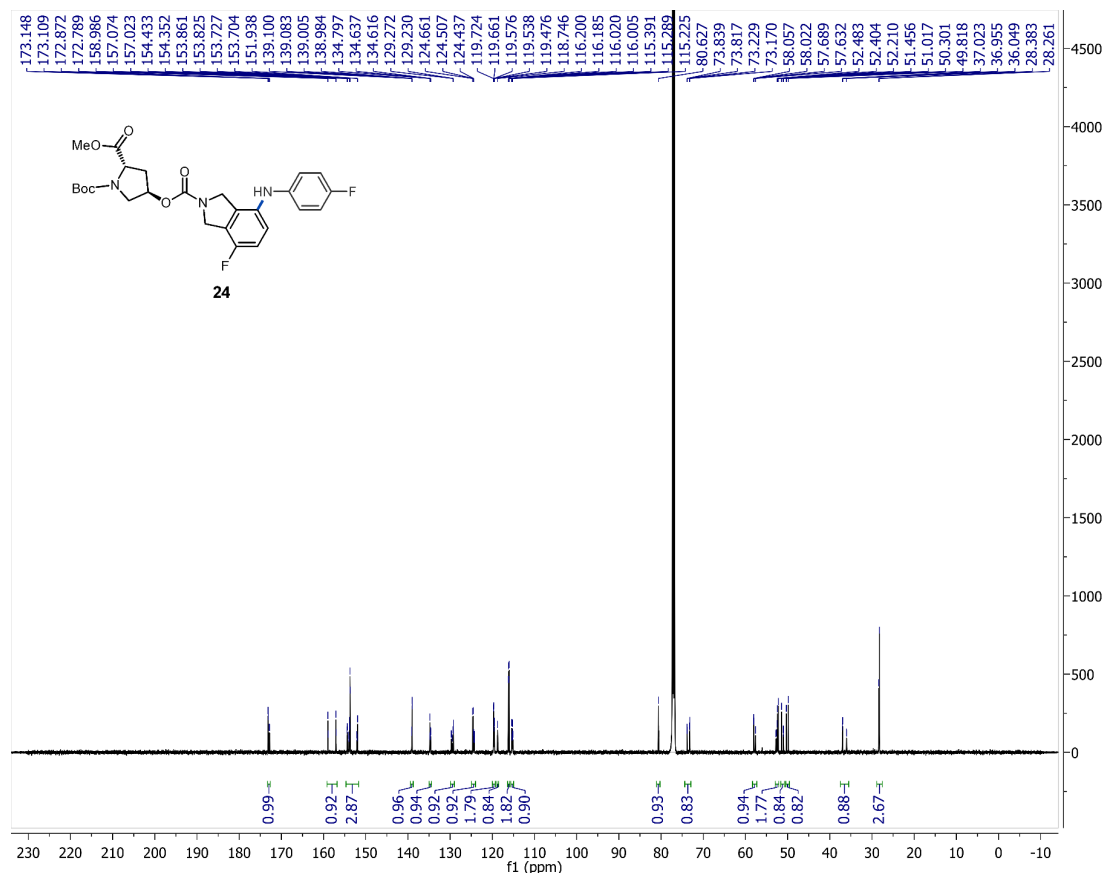

**Figure S99.** <sup>13</sup>C NMR (126 MHz, CDCl<sub>3</sub>) of **25**.

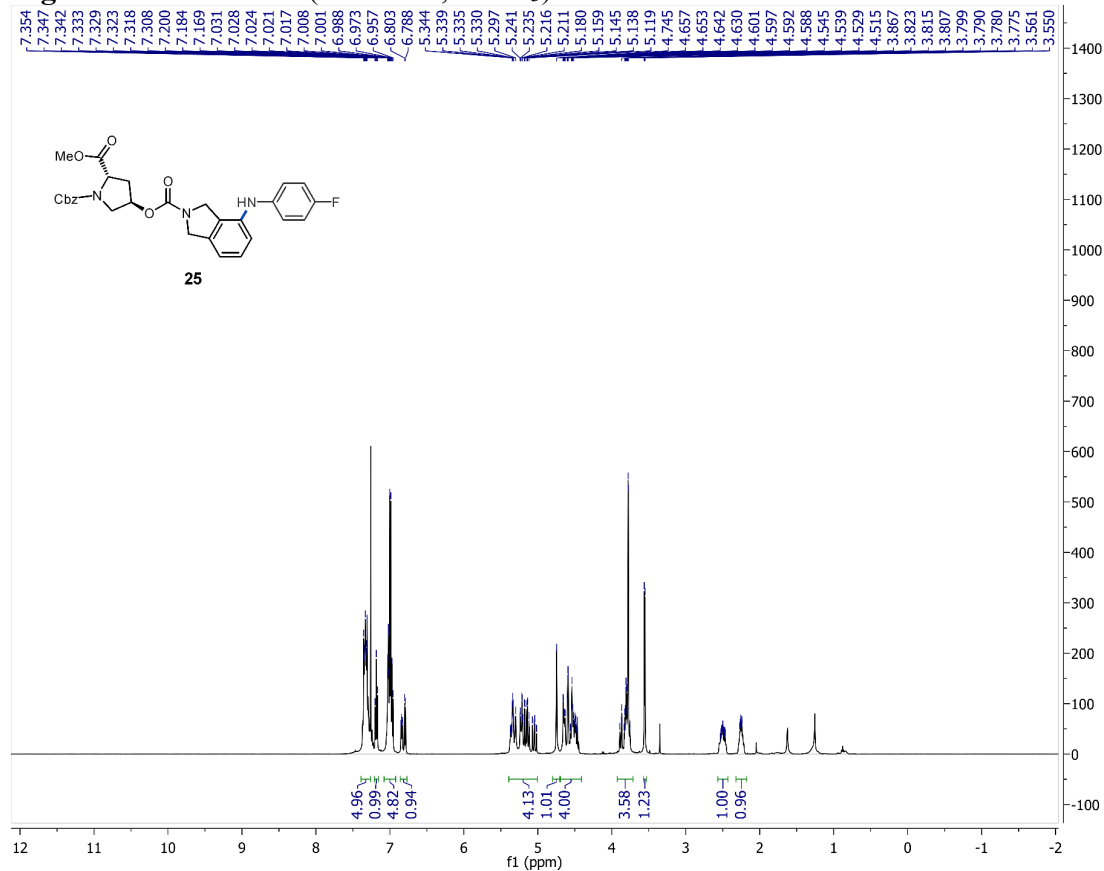

**Figure S100.** <sup>1</sup>H NMR (500 MHz, CDCl<sub>3</sub>) of **26**.

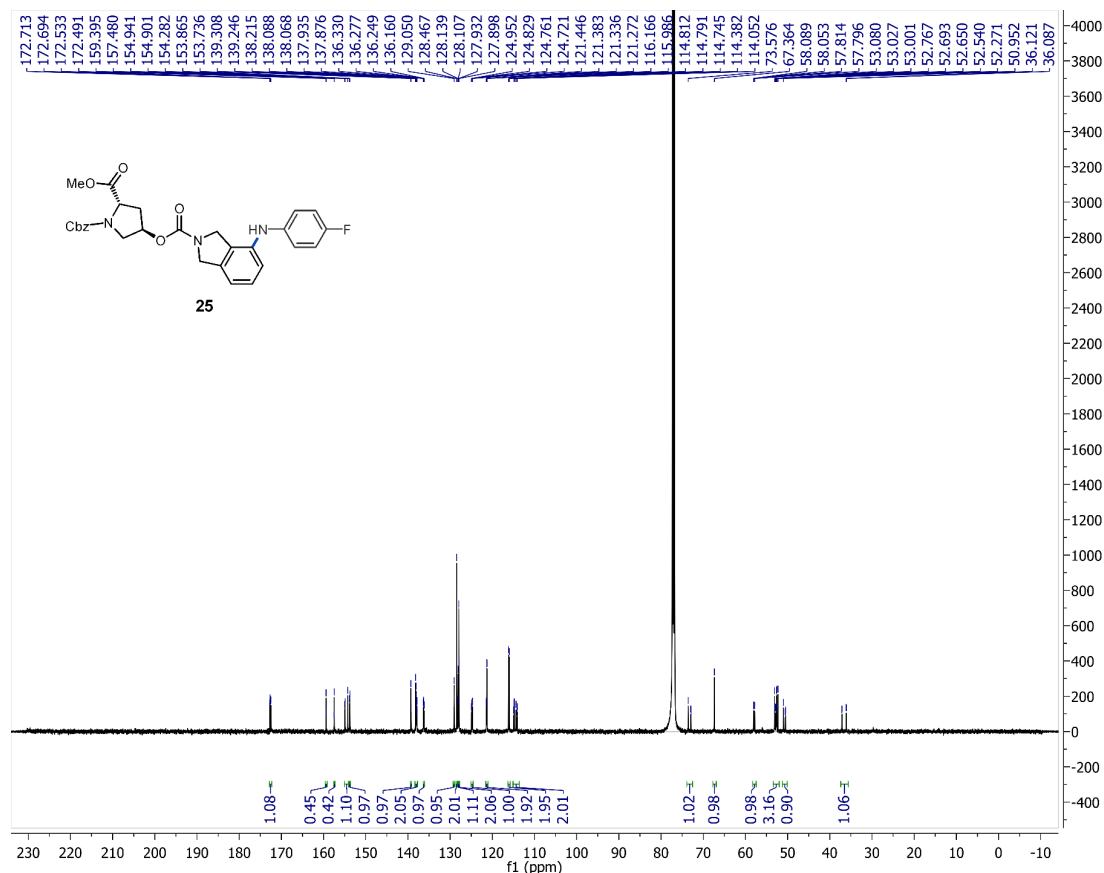

**Figure S101.** <sup>13</sup>C NMR (126 MHz, CDCl<sub>3</sub>) of **26**.

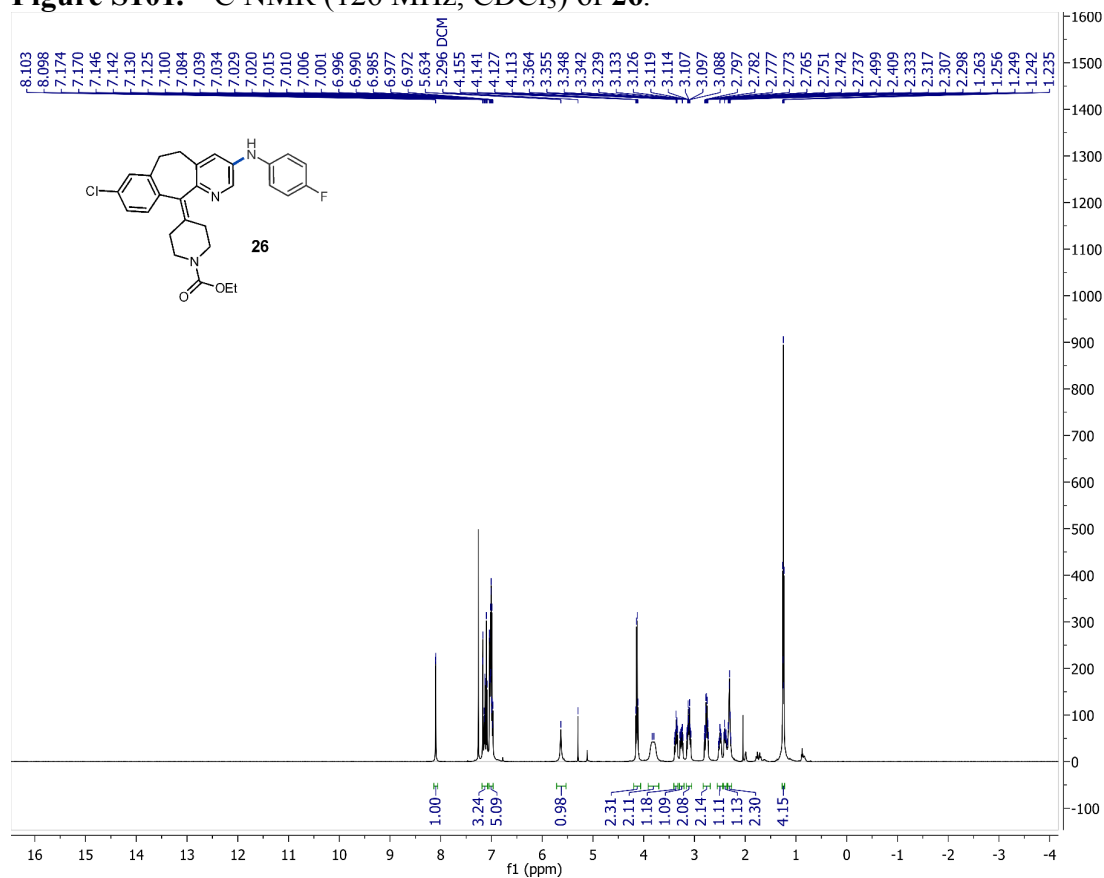

**Figure S102.** <sup>1</sup>H NMR (500 MHz, CDCl<sub>3</sub>) of **27**.

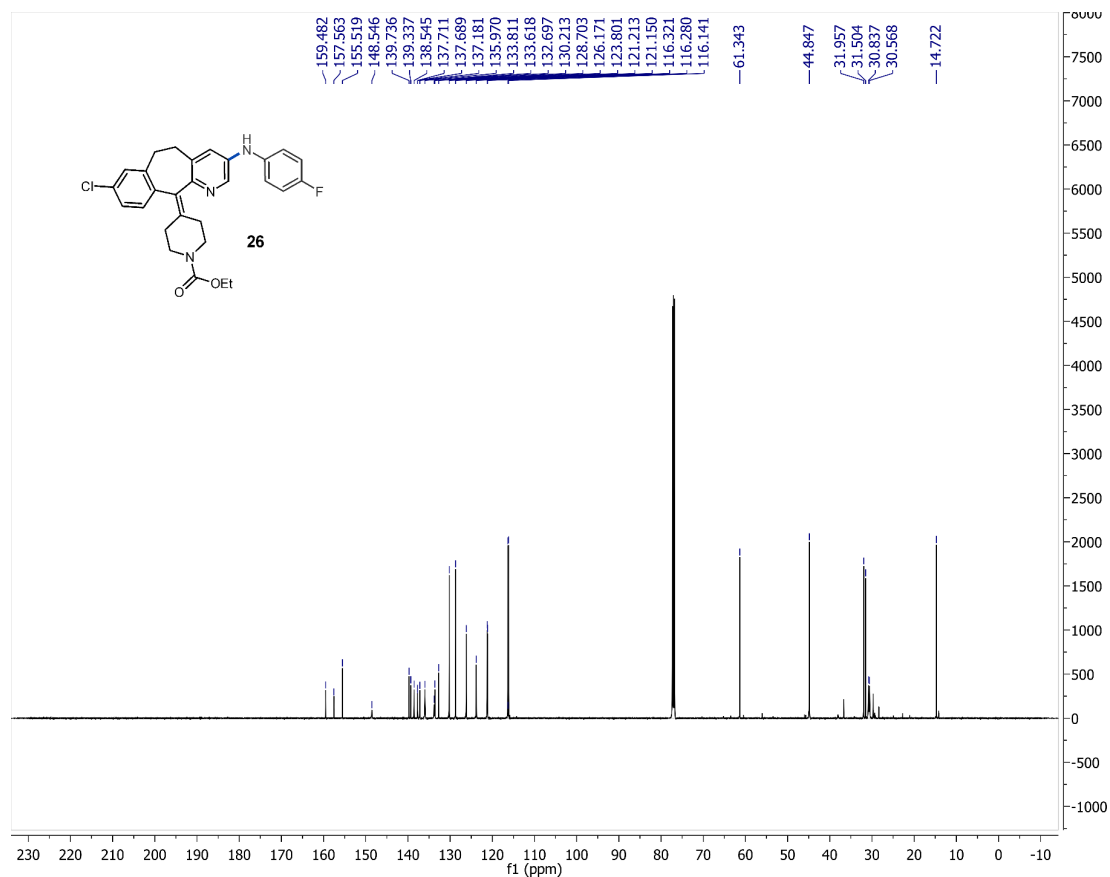

**Figure S103.** <sup>13</sup>C NMR (126 MHz, CDCl<sub>3</sub>) of **27**.

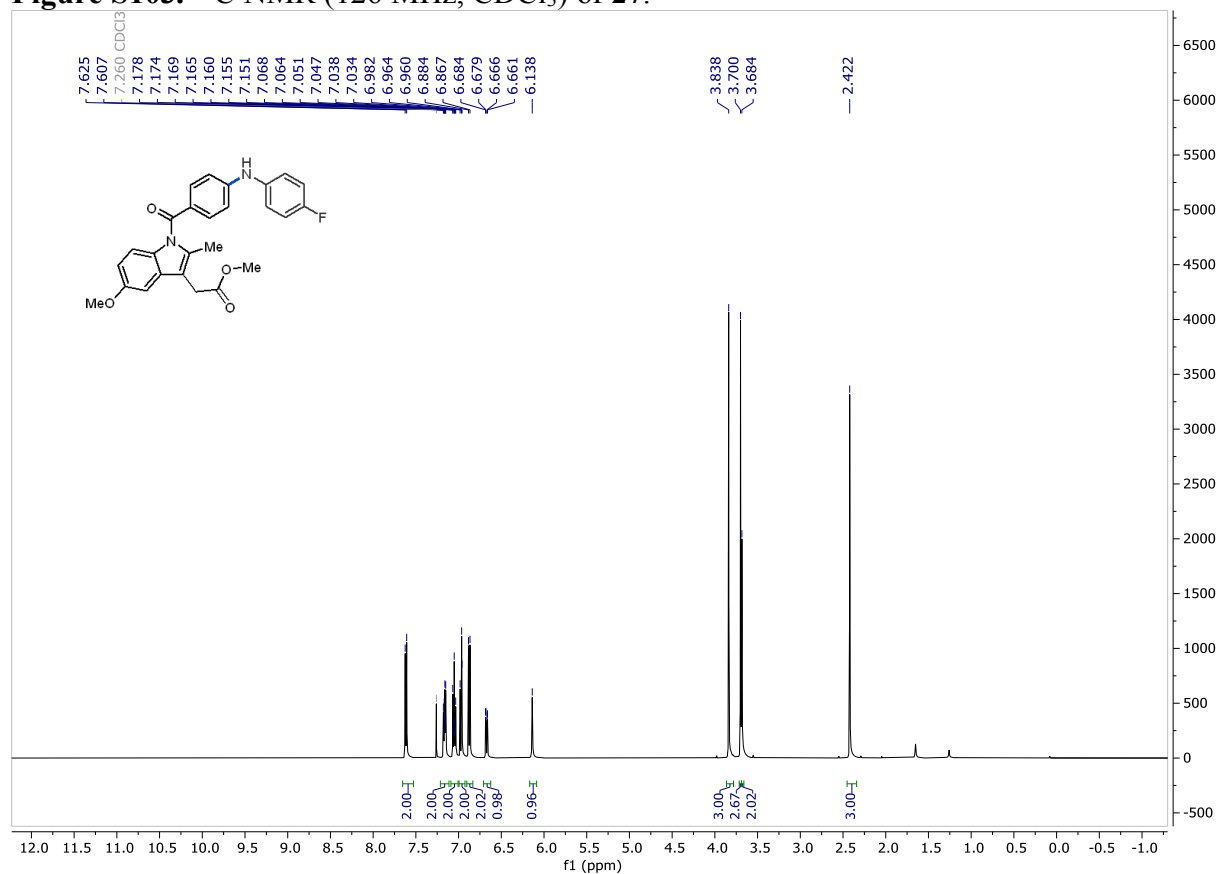

**Figure S104.** <sup>1</sup>H NMR (500 MHz, CDCl<sub>3</sub>) of **28**.



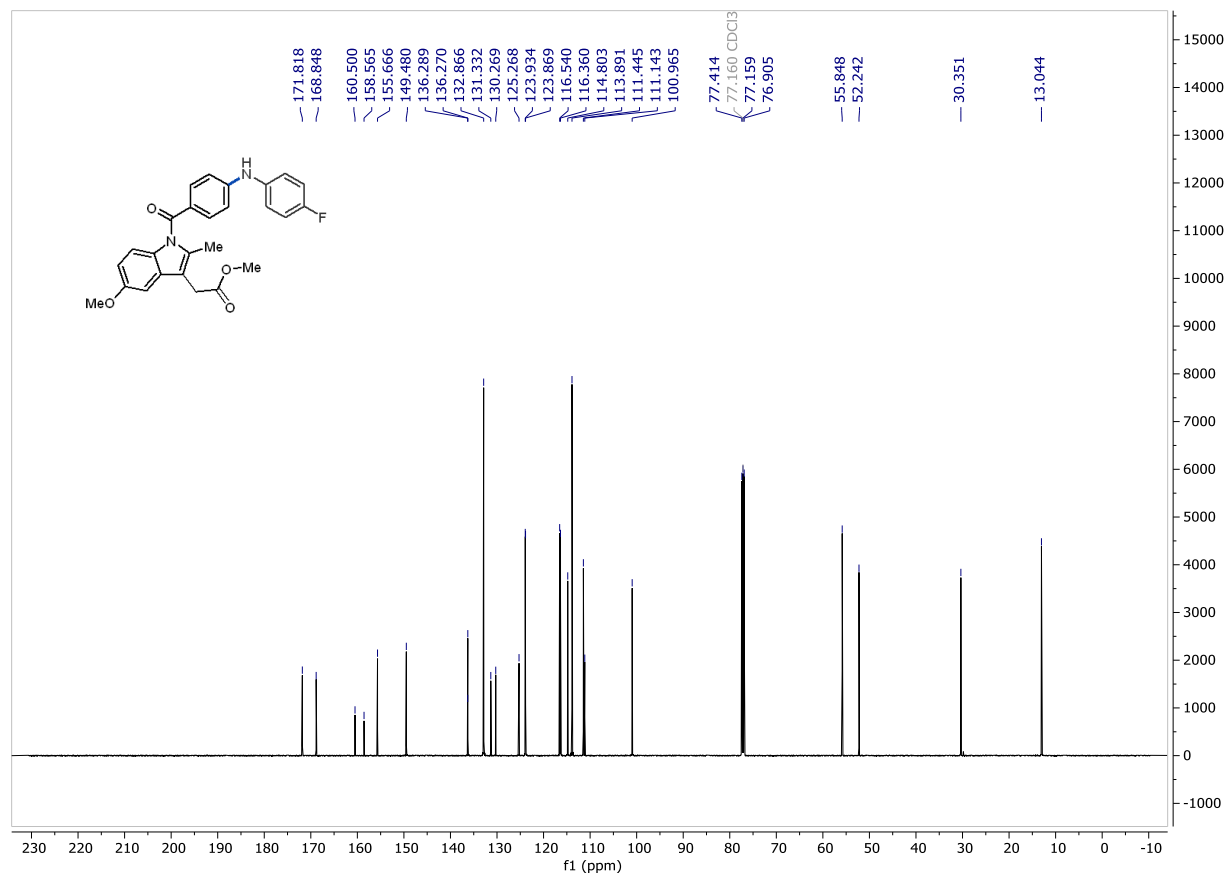

**Figure S105.** <sup>13</sup>C NMR (126 MHz, CDCl<sub>3</sub>) of **28**.

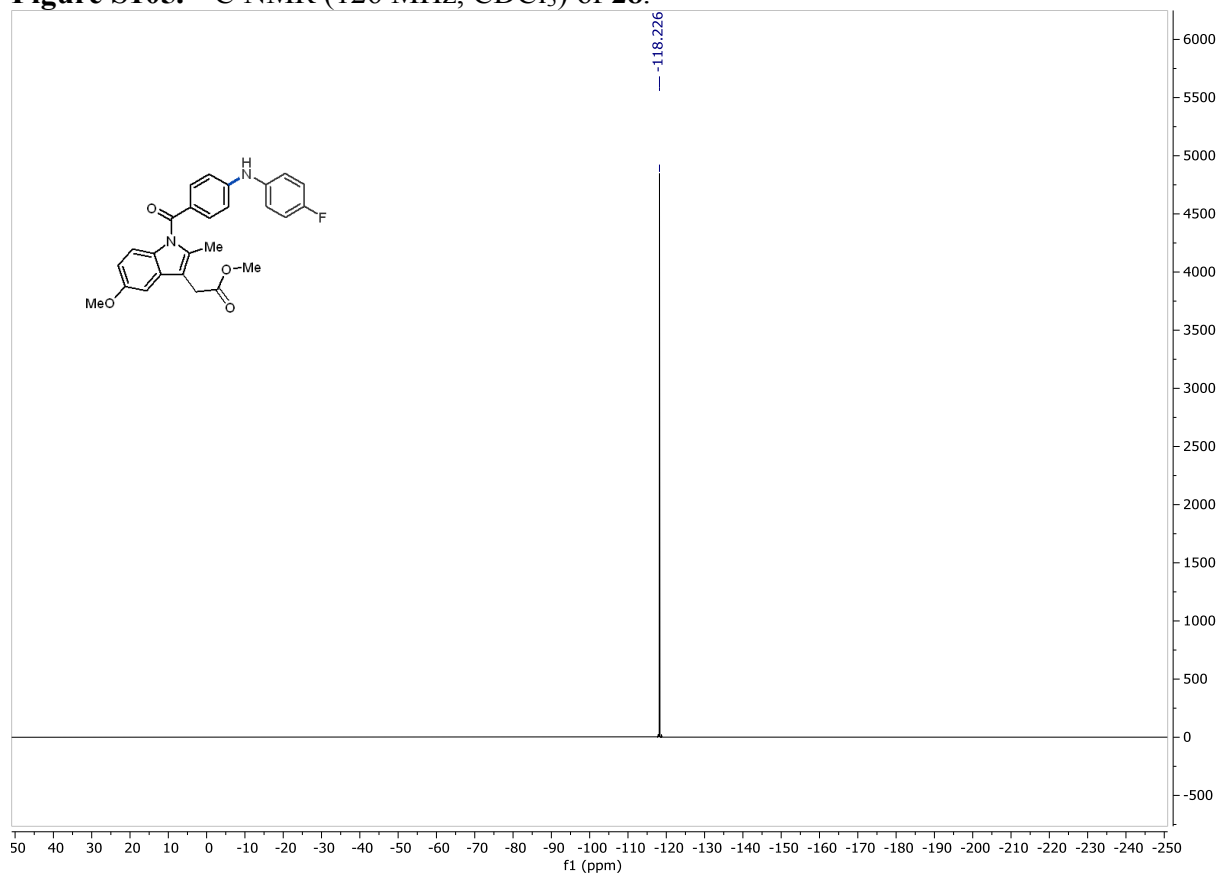

**Figure S106.** <sup>19</sup>F NMR (282 MHz, CDCl<sub>3</sub>) of **28**.

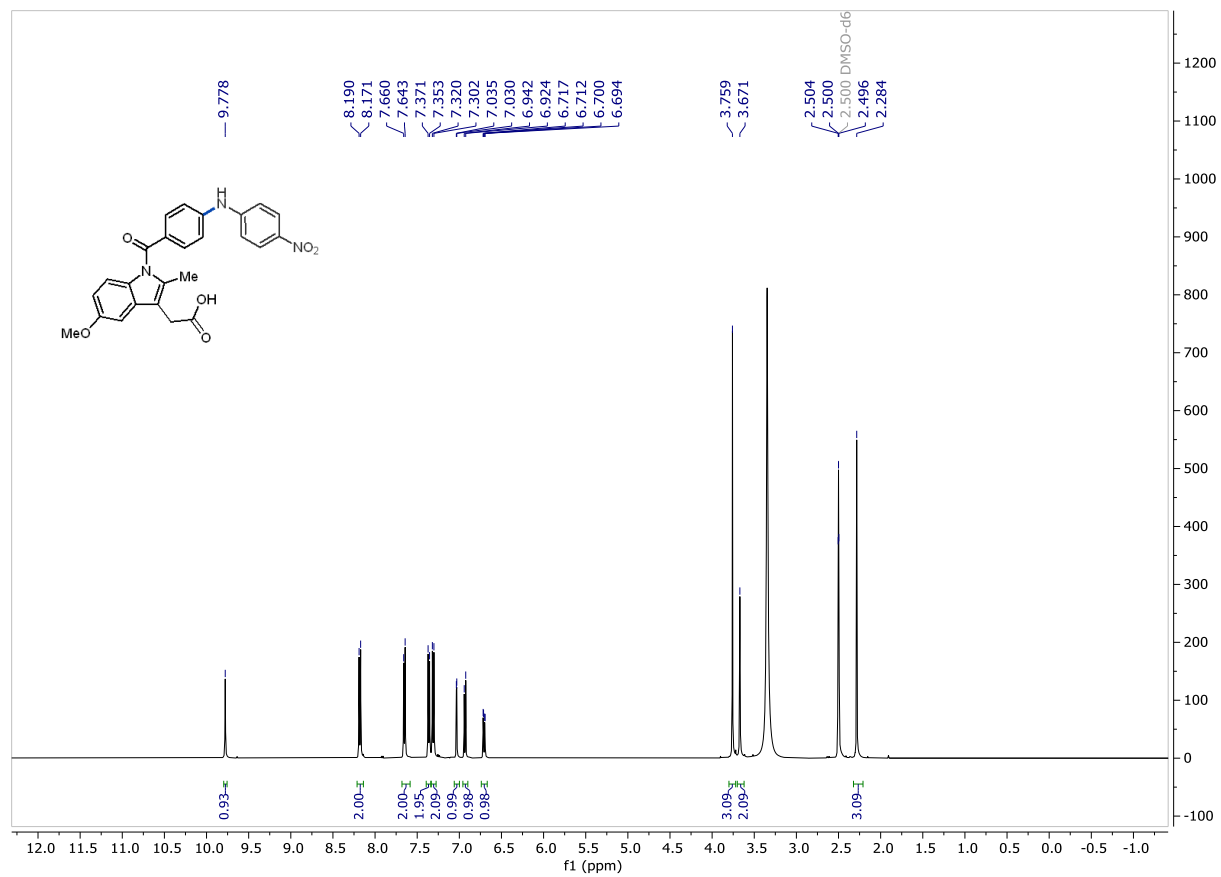

**Figure S107.** <sup>1</sup>H NMR (500 MHz, CDCl<sub>3</sub>) of **29**.

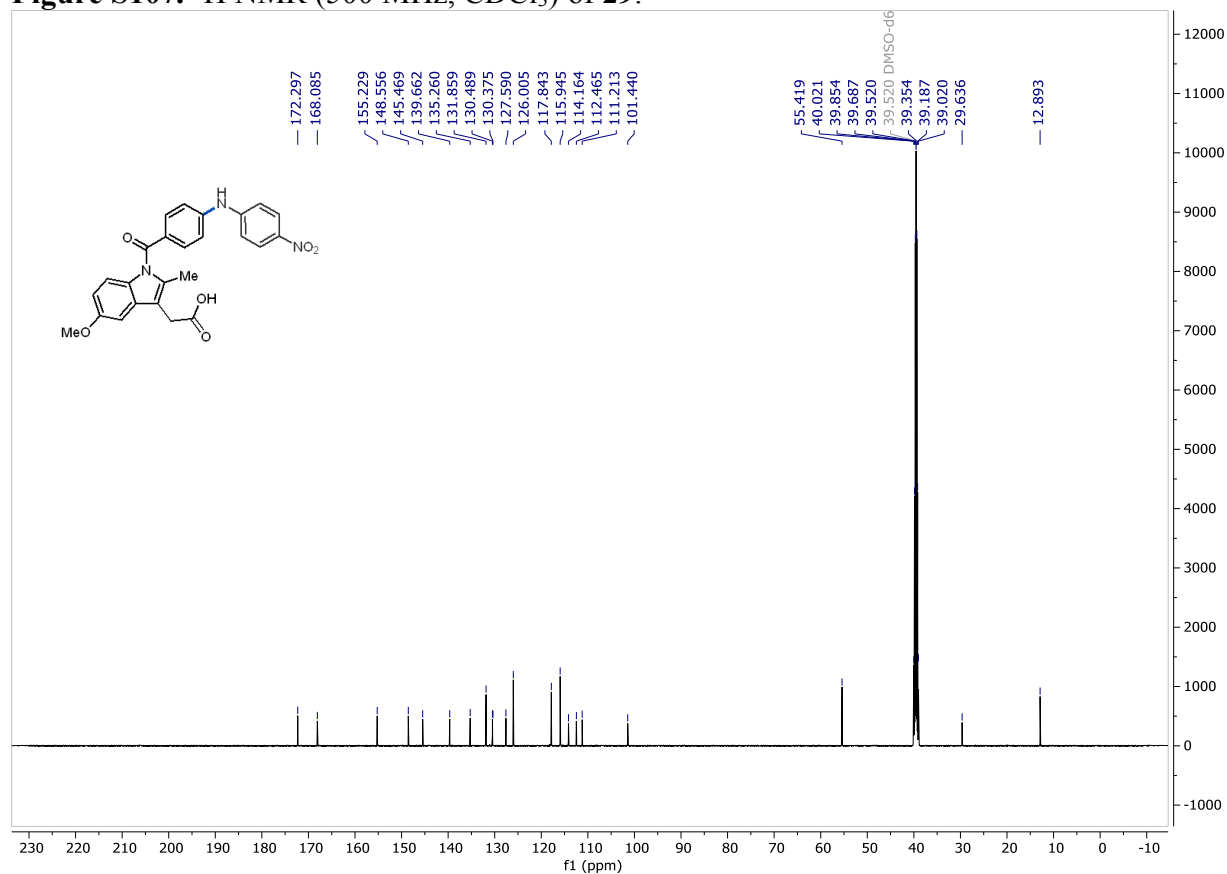

**Figure S108.** <sup>13</sup>C NMR (126 MHz, CDCl<sub>3</sub>) of **29**.

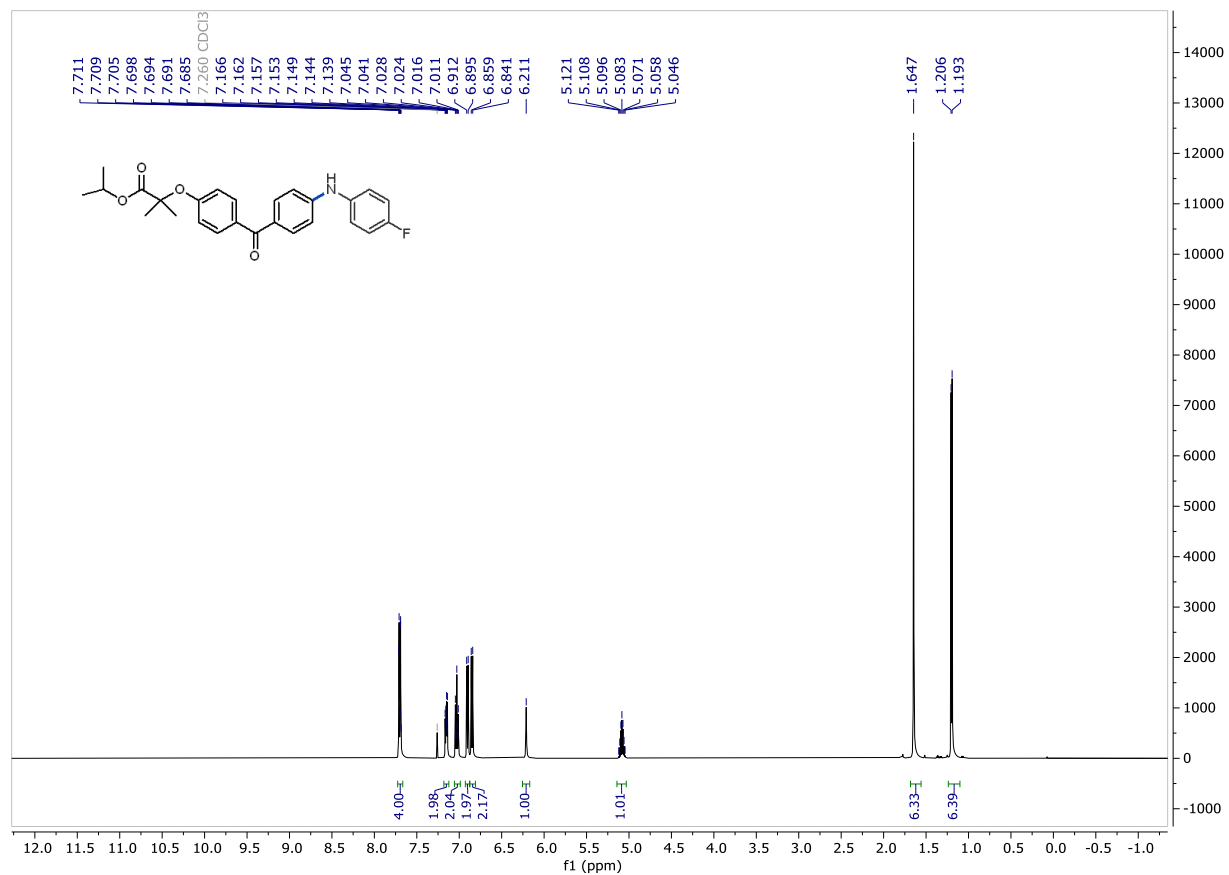

Figure S109. <sup>1</sup>H NMR (500 MHz, CDCl<sub>3</sub>) of 30.

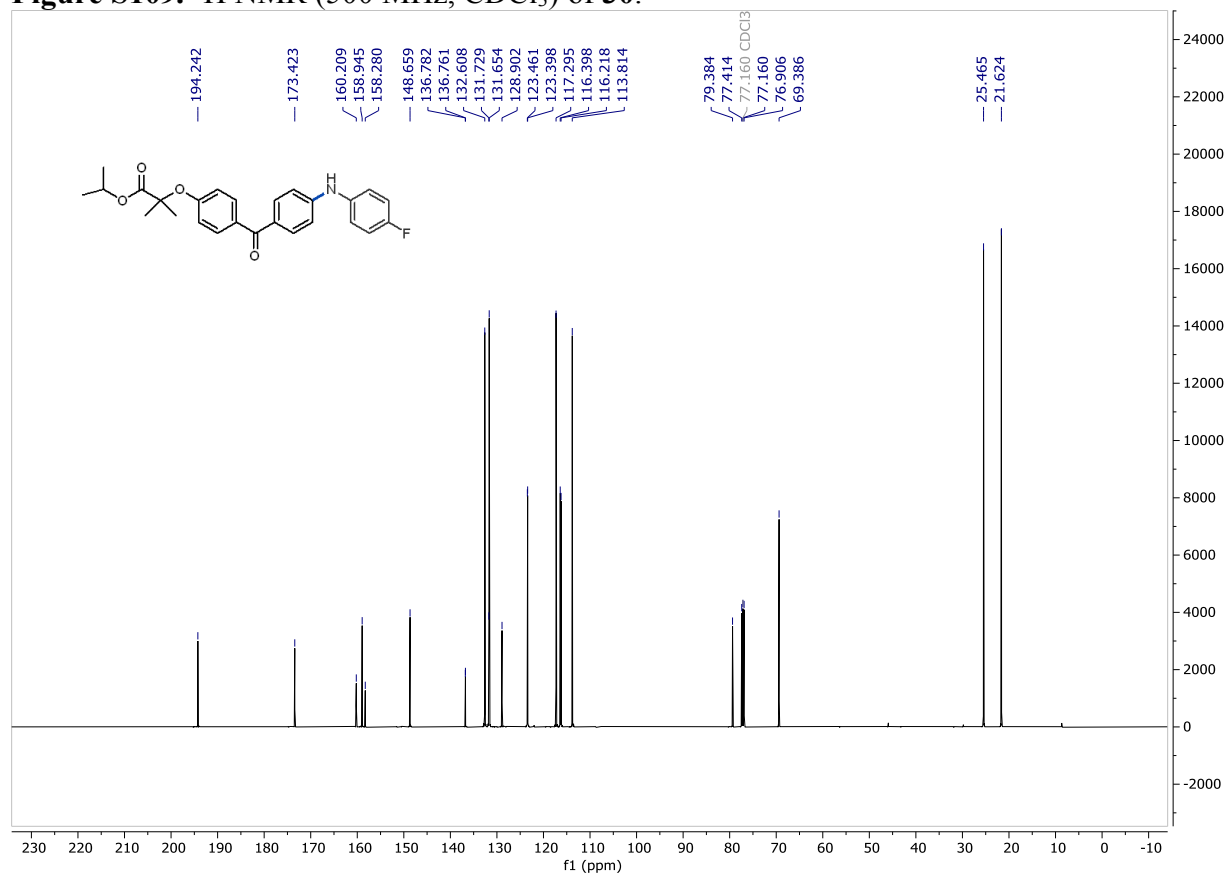

Figure S110. <sup>13</sup>C NMR (126 MHz, CDCl<sub>3</sub>) of 30.

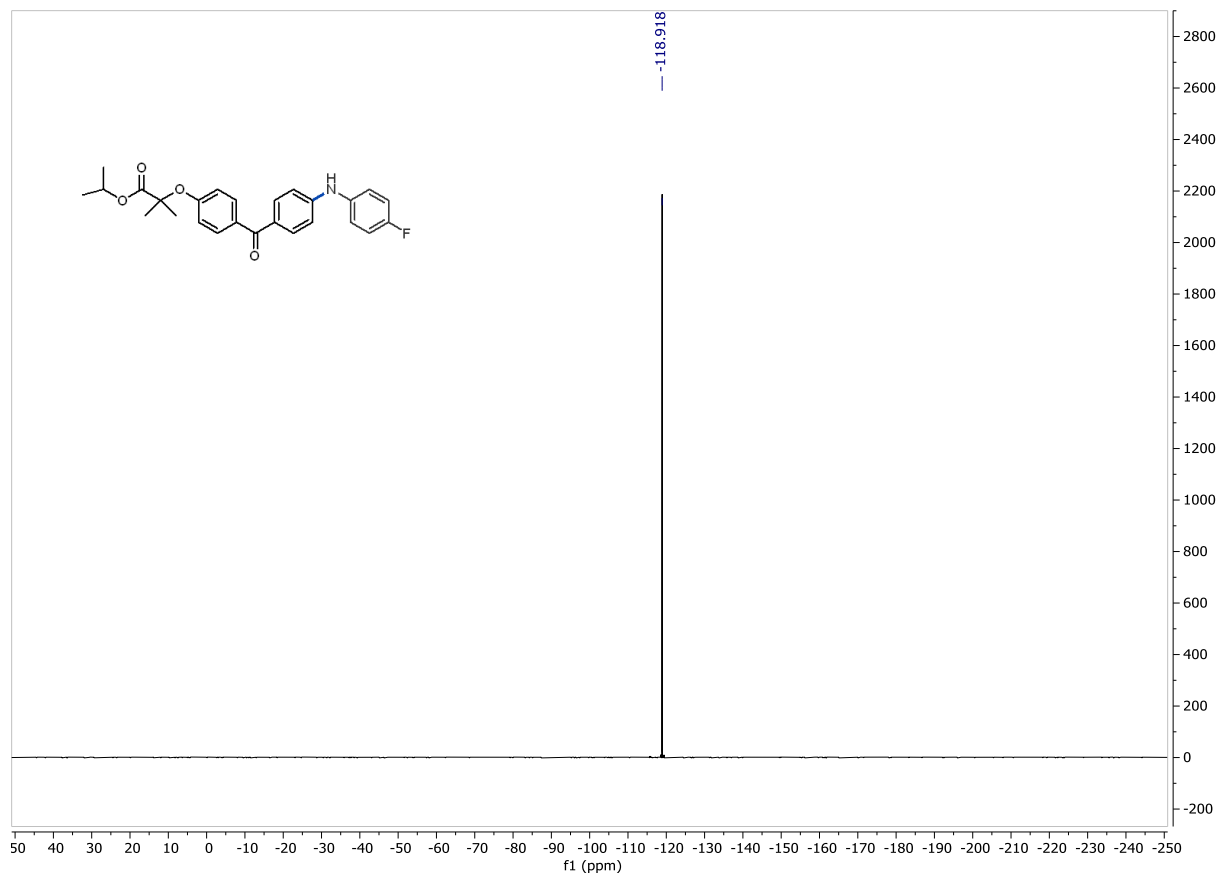

Figure S111. <sup>19</sup>F NMR (282 MHz, CDCl<sub>3</sub>) of 30.

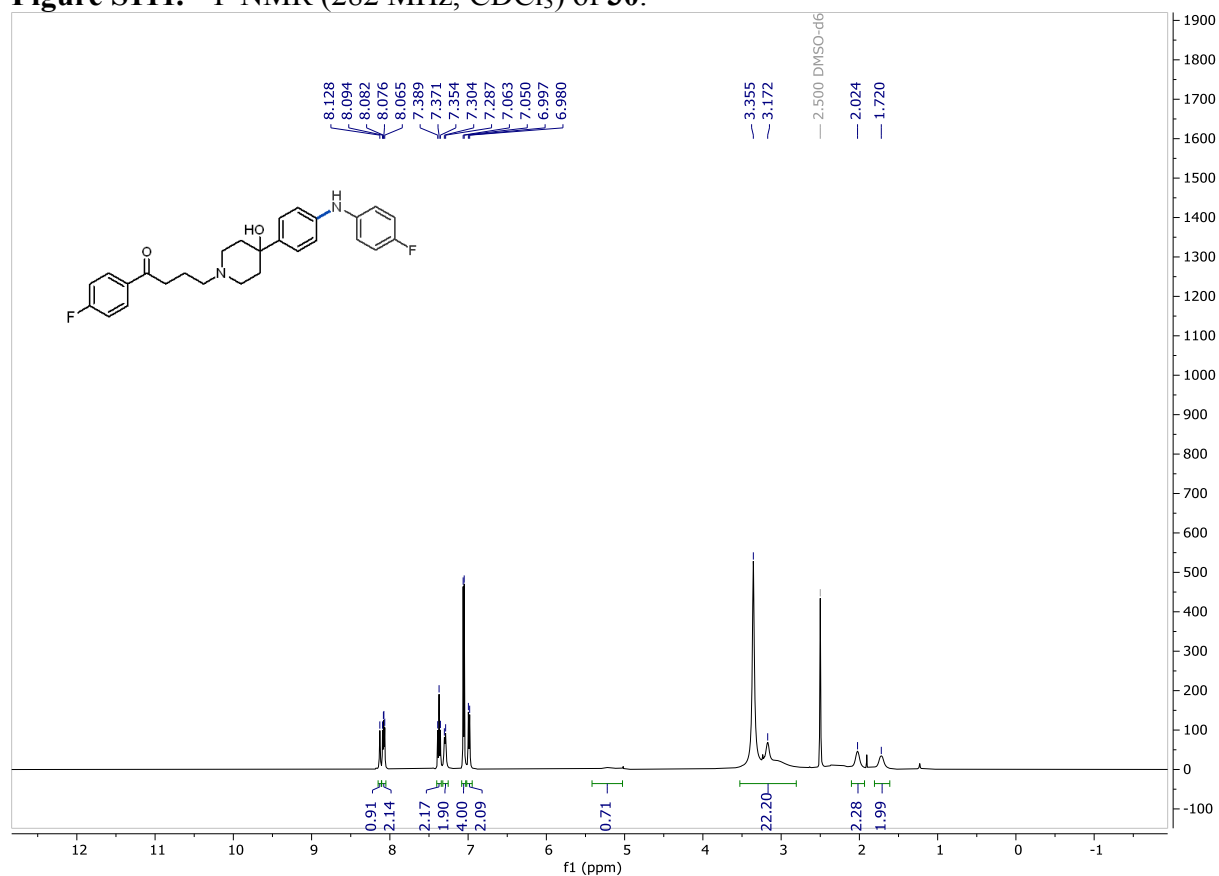

Figure S112. <sup>1</sup>H NMR (500 MHz, CDCl<sub>3</sub>) of 31.

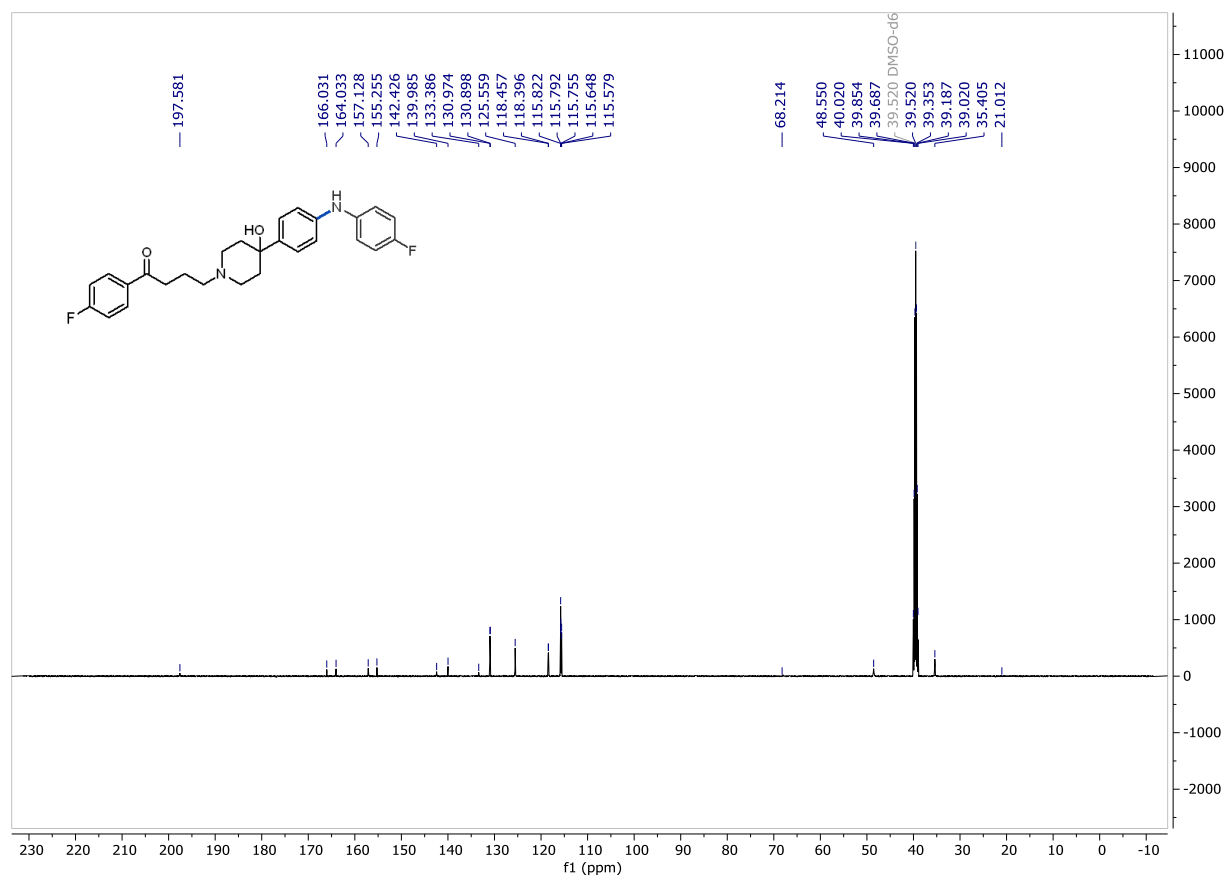

**Figure S113.** <sup>13</sup>C NMR (126 MHz, CDCl<sub>3</sub>) of **31**.

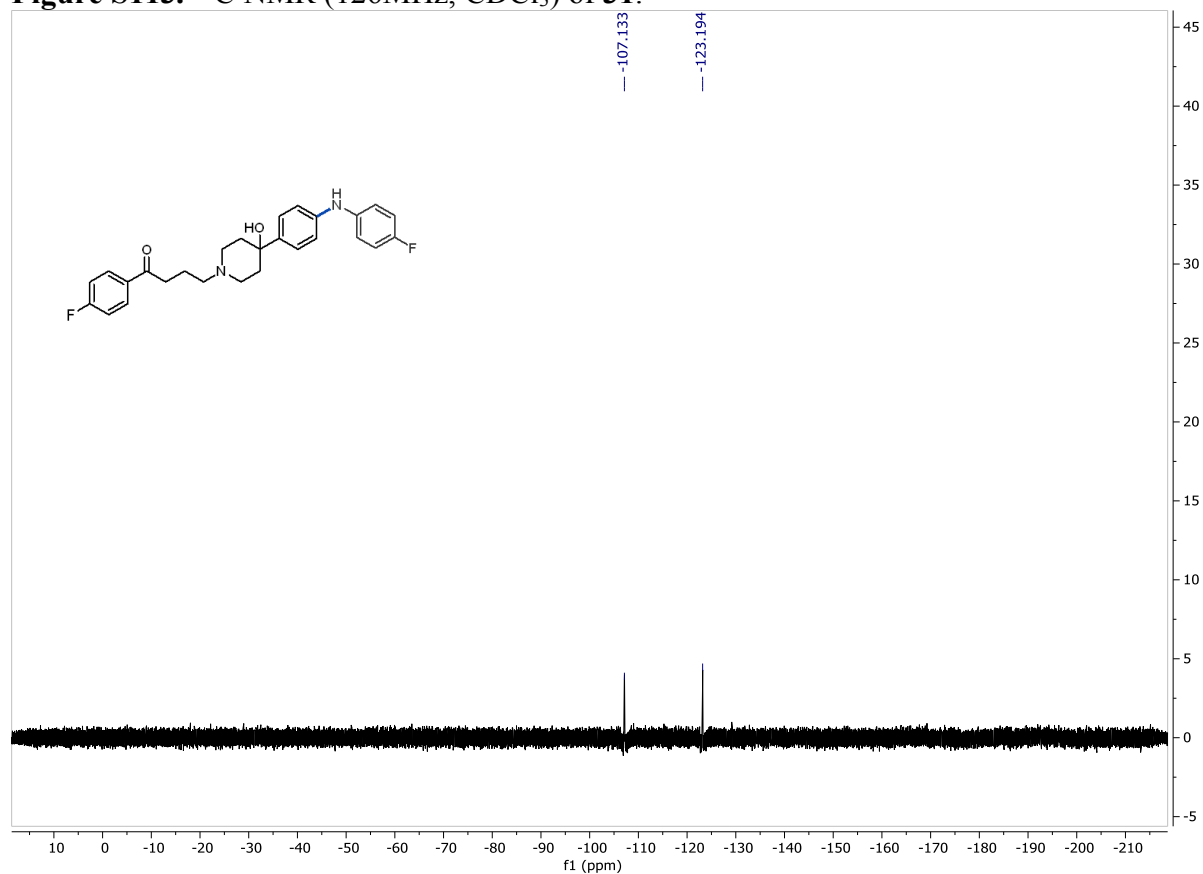

**Figure S114.** <sup>19</sup>F NMR (376 MHz, CDCl<sub>3</sub>) of **31**.

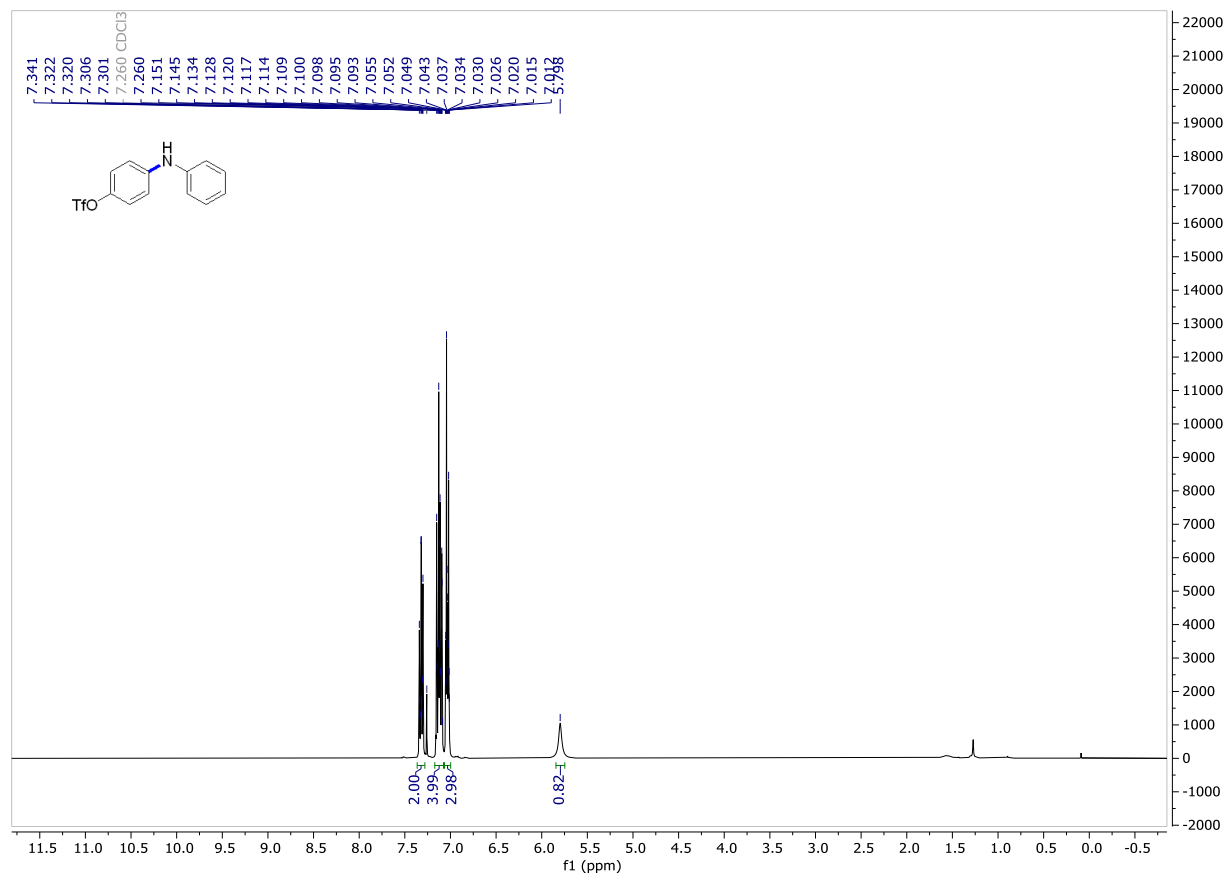

Figure S115. <sup>1</sup>F NMR (400 MHz, CDCl<sub>3</sub>) of S1.

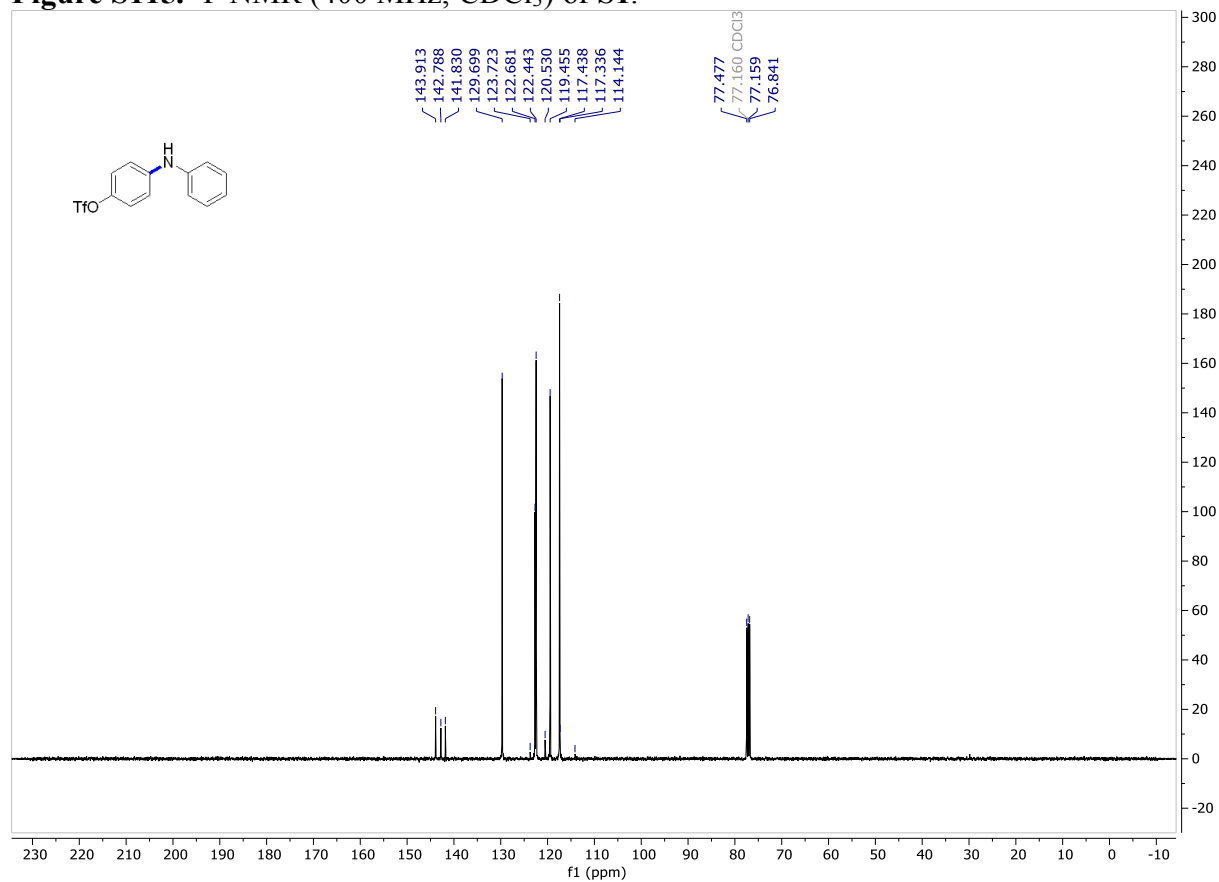

Figure S116. <sup>13</sup>C{<sup>1</sup>H} NMR (101 MHz, CDCl<sub>3</sub>) of S1.

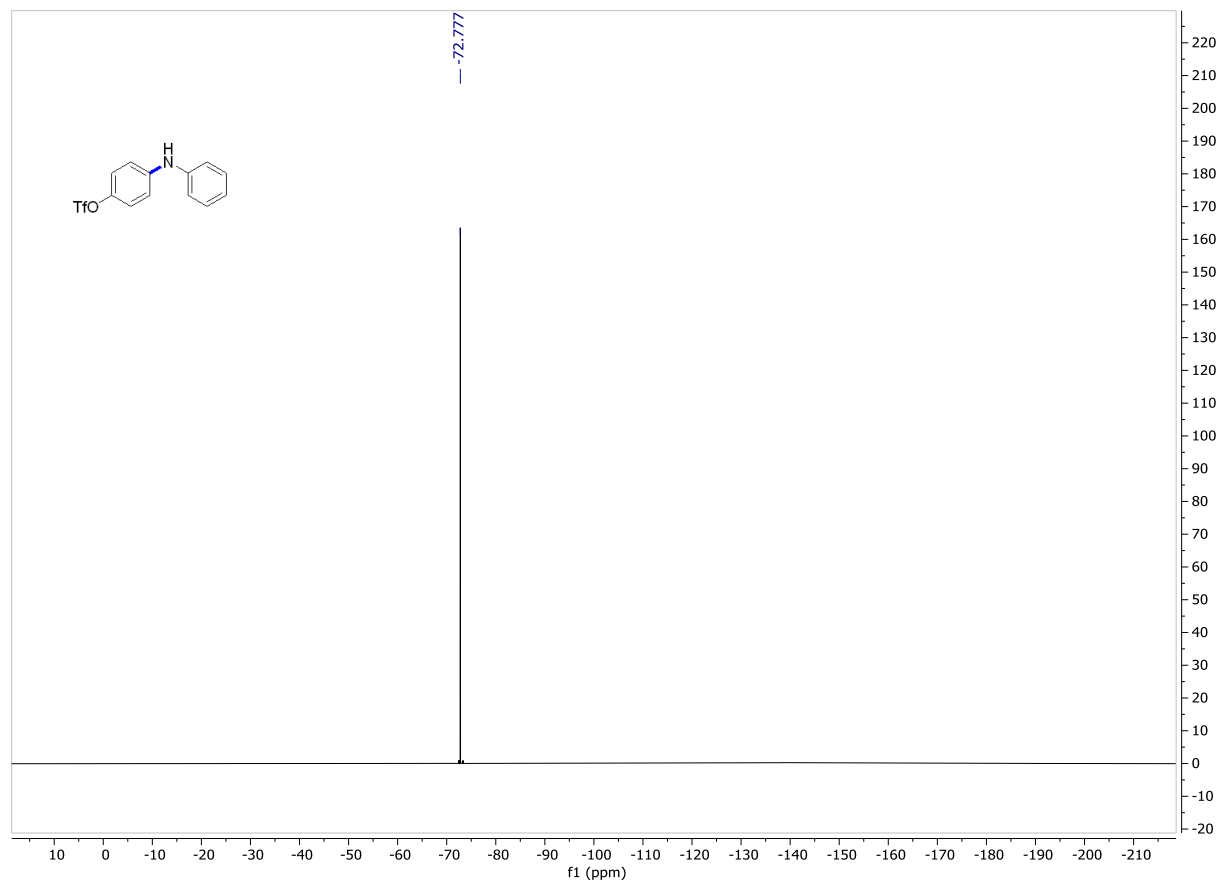

**Figure S117.**  $^{19}\text{F}$  NMR (376 MHz,  $\text{CDCl}_3$ ) of S1.

## References

- (1) Chen, L.; Ren, P.; Carrow, B. P. Tri(1-adamantyl)phosphine: Expanding the Boundary of Electron-Releasing Character Available to Organophosphorus Compounds. *J. Am. Chem. Soc.* **2016**, *138*, 6392-6395.
- (2) Chen, L.; Francis, H.; Carrow, B. P. An “On-Cycle” Precatalyst Enables Room-Temperature Polyfluoroarylation Using Sensitive Boronic Acids. *ACS Catalysis* **2018**, *8*, 2989-2994.
- (3) Chen, L.; Sanchez, D. R.; Zhang, B.; Carrow, B. P. “Cationic” Suzuki–Miyaura Coupling with Acutely Base-Sensitive Boronic Acids. *J. Am. Chem. Soc.* **2017**, *139*, 12418-12421.
- (4) Fulmer, G. R.; Miller, A. J. M.; Sherden, N. H.; Gottlieb, H. E.; Nudelman, A.; Stoltz, B. M.; Bercaw, J. E.; Goldberg, K. I. NMR Chemical Shifts of Trace Impurities: Common Laboratory Solvents, Organics, and Gases in Deuterated Solvents Relevant to the Organometallic Chemist. *Organometallics* **2010**, *29*, 2176-2179.
- (5) Nykaza, T. V.; Yang, J.; Radosevich, A. T.  $\text{PEt}_3$ -mediated deoxygenative CN coupling of nitroarenes and boronic acids. *Tetrahedron* **2019**, *75*, 3248-3252.
- (6) (a) Stambuli, J. P.; Kuwano, R.; Hartwig, J. F. Unparalleled rates for the activation of aryl chlorides and bromides: coupling with amines and boronic acids in minutes at room temperature. *Angew. Chem., Int. Ed.* **2002**, *41*, 4746-4748; (b) Marion, N.; Navarro, O.; Mei, J.; Stevens, E. D.; Scott, N. M.; Nolan, S. P. Modified (NHC)Pd(allyl)Cl (NHC = N-Heterocyclic Carbene) Complexes for Room-Temperature Suzuki–Miyaura and Buchwald–Hartwig Reactions. *J. Am. Chem. Soc.* **2006**, *128*, 4101-4111; (c) Beutner, G. L.; Coombs, J. R.; Green, R. A.; Inankur, B.; Lin, D.; Qiu, J.; Roberts, F.; Simmons, E. M.; Wisniewski, S. R. Palladium-Catalyzed Amidation and Amination of (Hetero)aryl Chlorides under Homogeneous Conditions Enabled by a Soluble DBU/NaTFA Dual-Base System. *Org. Process Res. Dev.* **2019**, *23*, 1529-1537; (d) Kashani, S. K.; Jessiman, J. E.; Newman, S. G. Exploring Homogeneous Conditions for Mild Buchwald–Hartwig Amination in Batch and Flow. *Org. Process Res. Dev.* **2020**.
- (7) Burés, J. Variable Time Normalization Analysis: General Graphical Elucidation of Reaction Orders from Concentration Profiles. *Angew. Chem. Int. Ed.* **2016**, *55*, 16084-16087.
- (8) (a) Bastug, G.; Nolan, S. P. [Pd(IPr\*OMe)(cin)Cl] (cin = Cinnamyl): A Versatile Catalyst for C–N and C–C Bond Formation. *Organometallics* **2014**, *33*, 1253-1258; (b) Akram, M. O.; Das, A.; Chakrabarty, I.; Patil, N. T. Ligand-Enabled Gold-Catalyzed C(sp<sup>2</sup>)–N Cross-Coupling Reactions of Aryl Iodides with Amines. *Org. Lett.* **2019**, *21*, 8101-8105; (c) Kampmann, S. S.; Sobolev, A. N.; Koutsantonis, G. A.; Stewart, S. G. Stable Nickel(0) Phosphites as Catalysts for C–N Cross-Coupling Reactions. *Adv. Synth. Catal.* **2014**, *356*, 1967-1973; (d) Kudisch, M.; Lim, C.-H.; Thordarson, P.; Miyake, G. M. Energy Transfer to Ni–Amine Complexes in Dual Catalytic, Light-Driven C–N Cross-Coupling Reactions. *J. Am. Chem. Soc.* **2019**, *141*, 19479-19486.



- (9) Hammett, L. P. The Effect of Structure upon the Reactions of Organic Compounds. Benzene Derivatives. *J. Am. Chem. Soc.* **1937**, *59*, 96-103.
- (10) (a) Kitamura, M.; Suga, S.; Oka, H.; Noyori, R. Quantitative Analysis of the Chiral Amplification in the Amino Alcohol-Promoted Asymmetric Alkylation of Aldehydes with Dialkylzincs. *J. Am. Chem. Soc.* **1998**, *120*, 9800-9809; (b) Rosner, T.; Le Bars, J.; Pfaltz, A.; Blackmond, D. G. Kinetic Studies of Heck Coupling Reactions Using Palladacycle Catalysts: Experimental and Kinetic Modeling of the Role of Dimer Species. *J. Am. Chem. Soc.* **2001**, *123*, 1848-1855; (c) Kina, A.; Iwamura, H.; Hayashi, T. A Kinetic Study on Rh/Binap-Catalyzed 1,4-Addition of Phenylboronic Acid to Enones: Negative Nonlinear Effect Caused by Predominant Homochiral Dimer Contribution. *J. Am. Chem. Soc.* **2006**, *128*, 3904-3905.
- (11) (a) Polynski, M. V.; Ananikov, V. P. Modeling Key Pathways Proposed for the Formation and Evolution of “Cocktail”-Type Systems in Pd-Catalyzed Reactions Involving ArX Reagents. *ACS Catal.* **2019**, *9*, 3991-4005; (b) Carrow, B. P.; Hartwig, J. F. Ligandless, Anionic, Arylpalladium Halide Intermediates in the Heck Reaction. *J. Am. Chem. Soc.* **2010**, *132*, 79-81; (c) Kolter, M.; Böck, K.; Karaghiosoff, K.; Koszinowski, K. Anionic Palladium(0) and Palladium(II) Ate Complexes. *Angew. Chem., Int. Ed.* **2017**, *56*, 13244-13248.
